# Supplementary material for: Dietary analysis reveals differences in the prey use of two sympatric bat species
Source: PubMed Central journal article supplement (PMC8717349; doi:10.1002/ece3.8472), 2021-12-16
Supplement: ECE3-11-18651-s001.pdf [file ECE3-11-18651-s001.pdf]

## Supplementary information S4 for *Dietary analysis reveals differences in the prey use of two sympatric bat species*

Olga Heim<sup>1</sup>, Anna I.E. Puisto<sup>2</sup>, Ilari Sääksjärvi<sup>3</sup>, Dai Fukui<sup>4</sup> and Eero J. Vesterinen<sup>5\*</sup>

<sup>1</sup> Faculty of Life and Medical Sciences, Doshisha University, 610-0321 Kyotanabe, Japan

<sup>2</sup> Centre for Population Health Research, University of Turku, 20014 Turku, Finland

<sup>3</sup> Biodiversity Unit, University of Turku, 20014 Turku, Finland

<sup>4</sup> The University of Tokyo Hokkaido Forest, The University of Tokyo, 079-1563 Furano, Japan

<sup>5</sup> Department of Biology, University of Turku, 20014 Turku, Finland

### List of checked species from the orders Coleoptera and Lepidoptera

| Primer | Order       | Family         | Subfamily      | Genus              | Species          | BIN          | Pest<br>[yes/no] | Crop/Host                      | Reference                                                                                                                                                                                                                                                                                       | Accessed |
|--------|-------------|----------------|----------------|--------------------|------------------|--------------|------------------|--------------------------------|-------------------------------------------------------------------------------------------------------------------------------------------------------------------------------------------------------------------------------------------------------------------------------------------------|----------|
| COI    | Coleoptera  | Carabidae      | Harpalinae     | Pterostichus       | oblongopunctatus | BOLD:ABY4764 | n                | -                              | www.cabi.org                                                                                                                                                                                                                                                                                    | 22-04-21 |
| COI    | Coleoptera  | Cryptophagidae | Atomariinae    | Atomaria           | turgida          | BOLD:AAJ9463 | n                | -                              | www.cabi.org                                                                                                                                                                                                                                                                                    | 22-04-21 |
| 16S    | Coleoptera  | Melandryidae   | Malandryinae   | Phloiotrya         | planiuscula      |              | n                | -                              | www.cabi.org                                                                                                                                                                                                                                                                                    | 22-04-21 |
| COI    | Coleoptera  | Nitidulidae    | Nitidulinae    | Cychramus          | variegatus       | BOLD:ABW4745 | n                | -                              | www.cabi.org                                                                                                                                                                                                                                                                                    | 22-04-21 |
| COI    | Lepidoptera | Crambidae      | Scopariinae    | Eudonia            | persimilis       | BOLD:AAF1478 | n                | -                              | www.cabi.org                                                                                                                                                                                                                                                                                    | 22-04-21 |
| COI    | Lepidoptera | Crambidae      | Spilomelinae   | Pleuroptya/Patania | expictalis       | BOLD:AAL4502 | n                | -                              | www.cabi.org                                                                                                                                                                                                                                                                                    | 22-04-21 |
| COI    | Lepidoptera | Drepanidae     | Thyatirinae    | Tetheella          | fluctuosa        | BOLD:AAD3647 | n                | -                              | www.cabi.org                                                                                                                                                                                                                                                                                    | 22-04-21 |
| COI    | Lepidoptera | Erebidae       | Erebinae       | Thyas              | juno             | BOLD:AAF1405 | y                | nut and fruit trees            | <a href="https://www.cabi.org/cpc/search/?q=Thyas+juno%0d%0a">https://www.cabi.org/cpc/search/?q=Thyas+juno%0d%0a</a>                                                                                                                                                                           | 22-04-21 |
| COI    | Lepidoptera | Erebidae       | Lymantriinae   | Lymantria          | dispar           | BOLD:AAA2052 | y                | deciduous and coniferous trees | <a href="https://www.cabi.org/isc/datasheet/31807#toimpact">https://www.cabi.org/isc/datasheet/31807#toimpact</a> ; <a href="http://www.ffpri-hkd.affrc.go.jp/group/konchu/Zukan/HTML/Lepi_Dokuga.htm">http://www.ffpri-hkd.affrc.go.jp/group/konchu/Zukan/HTML/Lepi_Dokuga.htm</a>             | 14-01-21 |
| COI    | Lepidoptera | Erebidae       | Lymantriinae   | Lymantria          | monacha          | BOLD:AAA5537 | y                | deciduous and coniferous trees | <a href="https://www.cabi.org/isc/datasheet/31811#todistribution">https://www.cabi.org/isc/datasheet/31811#todistribution</a> ; <a href="http://www.ffpri-hkd.affrc.go.jp/group/konchu/Zukan/HTML/Lepi_Dokuga.htm">http://www.ffpri-hkd.affrc.go.jp/group/konchu/Zukan/HTML/Lepi_Dokuga.htm</a> | 14-01-21 |
| COI    | Lepidoptera | Gelechiidae    | Gelechiinae    | Gelechia           | cuneatella       | BOLD:AAF5086 | n                | -                              | www.cabi.org                                                                                                                                                                                                                                                                                    | 22-04-21 |
| COI    | Lepidoptera | Gelechiidae    | Gelechiinae    | Psoricoptera       | gibbosella       | BOLD:AAD0608 | y                | oak                            | <a href="https://www.cabi.org/cpc/search/?q=Psoricoptera+gibbosella%0d%0a">https://www.cabi.org/cpc/search/?q=Psoricoptera+gibbosella%0d%0a</a>                                                                                                                                                 | 14-01-21 |
| 16S    | Lepidoptera | Geometridae    | Ennominae      | Arichanna          | melanaria        |              | n                | -                              | www.cabi.org                                                                                                                                                                                                                                                                                    | 22-04-21 |
| COI    | Lepidoptera | Geometridae    | Ennominae      | Cleora             | insolita         | BOLD:ACJ3813 | n                | -                              | www.cabi.org                                                                                                                                                                                                                                                                                    | 22-04-21 |
| COI    | Lepidoptera | Geometridae    | Ennominae      | Deileptenia        | ribeata          | BOLD:AAC3800 | n                | -                              | www.cabi.org                                                                                                                                                                                                                                                                                    | 22-04-21 |
| COI    | Lepidoptera | Geometridae    | Ennominae      | Ectropis           | crepuscularia    | BOLD:AAA2076 | y                | deciduous and coniferous trees | <a href="https://www.cabi.org/cpc/search/?q=Ectropis+crepuscularia%0d%0a">https://www.cabi.org/cpc/search/?q=Ectropis+crepuscularia%0d%0a</a>                                                                                                                                                   | 22-04-21 |
| 16S    | Lepidoptera | Geometridae    | Ennominae      | Ectropis           | obliqua          |              | y                | tea                            | 1                                                                                                                                                                                                                                                                                               |          |
| COI    | Lepidoptera | Geometridae    | Ennominae      | Hypomecis          | punctinalis      | BOLD:ACA2461 | n                | -                              | www.cabi.org                                                                                                                                                                                                                                                                                    | 22-04-21 |
| COI    | Lepidoptera | Geometridae    | Ennominae      | Menophra           | senilis          | BOLD:AAF3823 | n                | -                              | www.cabi.org                                                                                                                                                                                                                                                                                    | 22-04-21 |
| 16S    | Lepidoptera | Geometridae    | Ennominae      | Myrioblephara      | cilicornaria     |              | n                | -                              | www.cabi.org                                                                                                                                                                                                                                                                                    | 22-04-21 |
| COI    | Lepidoptera | Geometridae    | Ennominae      | Ourapteryx         | maculicaudaria   | BOLD:AAW9443 | n                | -                              | www.cabi.org                                                                                                                                                                                                                                                                                    | 22-04-21 |
| COI    | Lepidoptera | Geometridae    | Ennominae      | Phthorosema        | tendinosaria     | BOLD:AAF6489 | n                | -                              | www.cabi.org                                                                                                                                                                                                                                                                                    | 22-04-21 |
| COI    | Lepidoptera | Geometridae    | Geometrinae    | Jodis              | putata           | BOLD:ABZ4040 | n                | -                              | www.cabi.org                                                                                                                                                                                                                                                                                    | 22-04-21 |
| COI    | Lepidoptera | Geometridae    | Larentiinae    | Gandaritis         | fixseni          | BOLD:AAY1335 | n                | -                              | www.cabi.org                                                                                                                                                                                                                                                                                    | 22-04-21 |
| 16S    | Lepidoptera | Geometridae    | Larentiinae    | Lobogonodes        | erectaria        |              | n                | -                              | www.cabi.org                                                                                                                                                                                                                                                                                    | 22-04-21 |
| COI    | Lepidoptera | Gracillariidae | Gracillariinae | Caloptilia         | cf. heringi      | BOLD:ADK1669 | n                | -                              | www.cabi.org                                                                                                                                                                                                                                                                                    | 22-04-21 |

| Primer | Order       | Family         | Subfamily      | Genus          | Species         | BIN          | Pest<br>[yes/no] | Crop/Host                          | Reference                                                         | Accessed |
|--------|-------------|----------------|----------------|----------------|-----------------|--------------|------------------|------------------------------------|-------------------------------------------------------------------|----------|
| COI    | Lepidoptera | Gracillariidae | Gracillariinae | Caloptilia     | hidakensis      | BOLD:AAK1674 | n                | -                                  | www.cabi.org                                                      | 22-04-21 |
| COI    | Lepidoptera | Hesperiidae    | Coeliadinae    | Burara/Bibasis | aquilina        | BOLD:ACD6545 | y                | deciduous and<br>coniferous trees  | www.ffpri-hkd.affrc.go.jp/group/konchu/Zukan/HTML/Lepi_Chou.htm   | 14-01-21 |
| COI    | Lepidoptera | Hesperiidae    | Hesperiinae    | Thoessa        | varia           | BOLD:ADK0840 | n                | -                                  | www.cabi.org                                                      | 22-04-21 |
| COI    | Lepidoptera | Lasiocampidae  | Lasiocampinae  | Euthrix        | potatoria       | BOLD:AAC1584 | n                | -                                  | www.cabi.org                                                      | 22-04-21 |
| COI    | Lepidoptera | Noctuidae      | Acronictinae   | Belciades      | niveola         | BOLD:ACU0724 | n                | -                                  | www.cabi.org                                                      | 22-04-21 |
| COI    | Lepidoptera | Noctuidae      | Amphipyriinae  | Brachionycha   | nubeculosa      | BOLD:AAE0860 | n                | -                                  | www.cabi.org                                                      | 22-04-21 |
| COI    | Lepidoptera | Noctuidae      | Noctuinae      | Apamea         | helva           | BOLD:AAC5412 | n                | -                                  | www.cabi.org                                                      | 22-04-21 |
| COI    | Lepidoptera | Noctuidae      | Noctuinae      | Lithophane     | socia           | BOLD:AAE6607 | n                | -                                  | www.cabi.org                                                      | 22-04-21 |
| COI    | Lepidoptera | Noctuidae      | Noctuinae      | Spodoptera     | ciliium         | BOLD:AAC8279 | y                | vegetables                         | 2                                                                 |          |
| COI    | Lepidoptera | Noctuidae      | Noctuinae      | Spodoptera     | exigua          | BOLD:AAA6644 | y                | vegetables                         | 3                                                                 |          |
| COI    | Lepidoptera | Nolidae        | Chloephorinae  | Pseudoips      | prasinana       | BOLD:AAB8807 | y                | oak                                | https://www.cabi.org/cpc/search/?q=Pseudoips+prasinana%0d%0a      | 22-04-21 |
| COI    | Lepidoptera | Nolidae        | Nolinae        | Nola           | confusalis      | BOLD:AAB5563 | n                | -                                  | www.cabi.org                                                      | 22-04-21 |
| COI    | Lepidoptera | Notodontidae   | Heterocampinae | Stauropus      | fagi            | BOLD:AAD0646 | n                | -                                  | www.cabi.org                                                      | 22-04-21 |
| COI    | Lepidoptera | Pyralidae      | Pyralinae      | Endotracha     | olivacealis     | BOLD:ACI9403 | n                | -                                  | www.cabi.org                                                      | 22-04-21 |
| COI    | Lepidoptera | Saturniidae    | Saturniinae    | Saturnia       | jonasii         | BOLD:AAD1452 | n                | -                                  | www.cabi.org                                                      | 22-04-21 |
| COI    | Lepidoptera | Sphingidae     | Smerinthinae   | Marumba        | gaschkewitschii | BOLD:ABU7231 | y                | plum<br>deciduous trees,<br>shrubs | https://www.agric.wa.gov.au/organisms/105875                      | 14-01-21 |
| COI    | Lepidoptera | Sphingidae     | Sphinginae     | Sphinx         | ligustri        | BOLD:AAB6107 | y                |                                    | https://www.cabi.org/cpc/search/?q=Sphinx+ligustri%0d%0a          |          |
| COI    | Lepidoptera | Stathmopodidae | NA             | Stathmopoda    | pedella         | BOLD:AAD4282 | n                | -                                  | www.cabi.org                                                      | 22-04-21 |
| 16S    | Lepidoptera | Thyrididae     | Siculodinae    | Pyrrinioides   | aurea           |              | n                | -                                  | www.cabi.org                                                      | 22-04-21 |
| COI    | Lepidoptera | Tineidae       | Scardiinae     | Morophaga      | bucephala       | BOLD:AAG8510 | n                | -                                  | www.cabi.org                                                      | 22-04-21 |
| COI    | Lepidoptera | Tortricidae    | Olethreutinae  | Epinotia       | nisella         | BOLD:AAA7530 | n                | -                                  | www.cabi.org                                                      | 22-04-21 |
| COI    | Lepidoptera | Tortricidae    | Olethreutinae  | Eudemis        | porphyrana      | BOLD:AAC6854 | n                | -                                  | www.cabi.org                                                      | 22-04-21 |
| COI    | Lepidoptera | Tortricidae    | Olethreutinae  | Gypsonoma      | dealbana        | BOLD:AAB0380 | y                | poplar species                     | https://www.cabi.org/isc/datasheet/26271#tohostsOrSpeciesAffected | 22-04-21 |
| COI    | Lepidoptera | Tortricidae    | Olethreutinae  | Rhopobota      | naevana         | BOLD:AAA9812 | y                | fruit trees                        | 4                                                                 |          |
| COI    | Lepidoptera | Tortricidae    | Olethreutinae  | Spilonota      | laricana        | BOLD:AAA7739 | y                |                                    | https://www.cabi.org/isc/datasheet/51015#toplantTrade             | 22-04-21 |
| COI    | Lepidoptera | Tortricidae    | Olethreutinae  | Zeiraphera     | rufimitrana     | BOLD:AAM3356 | y                | fir species                        | https://www.cabi.org/cpc/search/?q=Zeiraphera+rufimitrana%0d%0a   | 22-04-21 |
| COI    | Lepidoptera | Tortricidae    | Tortricinae    | Acleris        | paradiseana     | BOLD:ADI2826 | n                | -                                  | www.cabi.org                                                      | 22-04-21 |
| COI    | Lepidoptera | Tortricidae    | Tortricinae    | Archips        | betulana        | BOLD:ACM3437 | n                | -                                  | www.cabi.org                                                      | 22-04-21 |
| COI    | Lepidoptera | Tortricidae    | Tortricinae    | Archips        | crataeganus     | BOLD:AAD6620 | y                | fruit trees                        | https://www.cabi.org/cpc/search/?q=Archips+crataeganus%0d%0a      | 22-04-21 |
| COI    | Lepidoptera | Tortricidae    | Tortricinae    | Choristoneura  | diversana       | BOLD:AAD8048 | y                | trees                              | 北海道森林害虫图鉴 (affrc.go.jp)                                           | 14-01-21 |
| COI    | Lepidoptera | Tortricidae    | Tortricinae    | Eana           | incanana        | BOLD:AAD7476 | n                | -                                  | www.cabi.org                                                      | 22-04-21 |
| COI    | Lepidoptera | Tortricidae    | Tortricinae    | Pandemis       | cinnamomeana    | BOLD:AAD0575 | y                | fruit trees                        | https://www.cabi.org/cpc/search/?q=Pandemis+cinnamomeana%0d%0a    | 22-04-21 |
| COI    | Lepidoptera | Tortricidae    | Tortricinae    | Pandemis       | corylana        | BOLD:AAC5400 | y                | nut and fruit trees                | https://www.cabi.org/cpc/search/?q=Pandemis+corylana              | 22-04-21 |
| COI    | Lepidoptera | Tortricidae    | Tortricinae    | Ptycholoma     | lecheanum       | BOLD:AAD3264 | y                | fruit trees                        | https://www.cabi.org/cpc/search/?q=Ptycholoma+lecheanum%0d%0a     | 22-04-21 |
| COI    | Lepidoptera | Ypsolophidae   | Ypsolophinae   | Ypsolopha      | vittella        | BOLD:AAD9548 | n                | -                                  | www.cabi.org                                                      | 22-04-21 |

## References

- 1 YANG, Y., ZHANG, L., GUO, F., LONG, Y., WANG, Y. & WAN, X. 2016. Reidentification of sex pheromones of tea geometrid *Ectropis obliqua* Prout (Lepidoptera: Geometridae). *Journal of economic entomology*, 109, 167-175.
- 2 WATABIKI, D., YOSHIMATSU, S.-I., YOSHITAKE, H., BABA, Y., UESATO, T., SHIMATANI, M., IBUSUKI, H. & YUDA, T. 2013. Discrimination methods for Japanese pest species of *Spodoptera* Guenée (Lepidoptera: Noctuidae) lured by traps using a synthetic sex pheromone for *Spodoptera exempta*. *Japanese Journal of Applied Entomology and Zoology*, 57, 19-26.
- 3 XIA-LIN, Z., CONG, X.-P., WANG, X.-P. & LEI, C.-L. 2011. A review of geographic distribution, overwintering and migration in *Spodoptera exigua* Hübner (Lepidoptera: Noctuidae). *Journal of the Entomological Research Society*, 13, 39-48.
- 4 FITZPATRICK, S. M. & TROUBRIDGE, J. T. 1993. Fecundity, number of diapause eggs, and egg size of successive generations of the blackheaded fireworm (Lepidoptera: Tortricidae) on cranberries. *Environmental entomology*, 22, 818-823.
