# Supplementary material for: Dietary analysis reveals differences in the prey use of two sympatric bat species
Source: PubMed Central journal article supplement (PMC8717349; doi:10.1002/ece3.8472), 2021-12-16
Supplement: ECE3-11-18651-s003.pdf [file ECE3-11-18651-s003.pdf]

## Supplementary information S3 for *Dietary analysis reveals differences in the prey use of two sympatric bat species*

Olga Heim<sup>1</sup>, Anna I.E. Puisto<sup>2</sup>, Ilari Sääksjärvi<sup>3</sup>, Dai Fukui<sup>4</sup> and Eero J. Vesterinen<sup>5\*</sup>

1 Faculty of Life and Medical Sciences, Doshisha University, 610-0321 Kyotanabe, Japan

2 Centre for Population Health Research, University of Turku, 20014 Turku, Finland

3 Biodiversity Unit, University of Turku, 20014 Turku, Finland

4 The University of Tokyo Hokkaido Forest, The University of Tokyo, 079-1563 Furano, Japan

5 Department of Biology, University of Turku, 20014 Turku, Finland

### Prey item classification

| Order      | Family          | Subfamily     | Genus              | Species          | BIN          | Flight capability | Reference       | Diel activity | Reference                            | Mode of capture |
|------------|-----------------|---------------|--------------------|------------------|--------------|-------------------|-----------------|---------------|--------------------------------------|-----------------|
| Araneae    | Lycosidae       | NA            | Pardosa            |                  | BOLD:ABA5238 | non-volant        | Morphology      |               |                                      | gleaning        |
| Araneae    | Salticidae      |               |                    |                  | BOLD:AAV1597 | non-volant        | Morphology      |               |                                      | gleaning        |
| Araneae    | Salticidae      |               |                    |                  | GBCH10991-13 | non-volant        | Morphology      |               |                                      | gleaning        |
| Araneae    | Salticidae      |               |                    |                  | BOLD:ACH5240 | non-volant        | Morphology      |               |                                      | gleaning        |
| Collembola | Bourletiellidae | NA            | Deuterostminthurus |                  | BOLD:AAB7915 | non-volant        | Morphology      |               |                                      | gleaning        |
| Blattodea  | Ectobiidae      | Ectobiinae    |                    |                  | BOLD:ACI8100 | non-volant        | Morphology      |               |                                      | gleaning        |
| Coleoptera | Carabidae       |               |                    |                  | BOLD:AAZ4621 | non-volant        | Roff 1990       |               |                                      | gleaning        |
| Coleoptera | Coccinellidae   |               |                    |                  | BOLD:ACP4109 | volant            | Roff 1994       | diurnal       | Honek&Hodek 1996                     | gleaning        |
| Coleoptera | Cantharidae     | Cantharinae   | Podabrus           |                  | BOLD:ACD6222 | volant            | Roff 1994       | diurnal       | Tsukiji 2020 (2021/05/18)            | gleaning        |
| Coleoptera | Cantharidae     | Cantharinae   | Podabrus           |                  | BOLD:ACD6257 | volant            | Roff 1994       | diurnal       | Tsukiji 2020 (2021/05/18)            | gleaning        |
| Coleoptera | Carabidae       | Harpalinae    |                    |                  | BOLD:ABX4019 | non-volant        | Roff 1990       |               |                                      | gleaning        |
| Coleoptera | Carabidae       | Carabinae     | Carabus            |                  | BOLD:ABY6003 | non-volant        | Roff 1990       |               |                                      | gleaning        |
| Coleoptera | Carabidae       | Harpalinae    | Pterostichus       | oblongopunctatus | BOLD:ABY4764 | non-volant        | Roff 1990       |               |                                      | gleaning        |
| Coleoptera | Cerambycidae    | Lamiinae      | Monochamus         |                  | BOLD:AAC3388 | volant            | Roff 1994       | undecided     | Tsukiji 2020 (2021/05/18)            | undecided       |
| Coleoptera | Chrysomelidae   | Chrysomelinae |                    |                  | BOLD:AAC0432 | volant            | Roff 1994       | diurnal       | Jolivet&Pierre 1981                  | gleaning        |
| Coleoptera | Cryptophagidae  | Atomariinae   | Atomaria           | turgida          | BOLD:AAJ9463 | volant            | Roff 1994       | nocturnal     | Tharandt 2010                        | aerial-hawking  |
| Coleoptera | Curculionidae   | Entiminae     | Polydrusus         |                  | BOLD:ACO8630 | volant            | Roff 1994       | diurnal       | Novella-Fernandez et al. 2020        | gleaning        |
| Coleoptera | Hydrophilidae   | Hydrophilinae | Enochrus           |                  | BOLD:AAF0204 | volant            | Roff 1994       | diurnal       | Tsukiji 2020 (2021/05/18)            | gleaning        |
| Coleoptera | Nitidulidae     | Nitidulinae   | Cychramus          | variegatus       | BOLD:ABW4745 | volant            | Roff 1994       | nocturnal     | Yee & Kehl 2015; Mikkola 1972        | aerial-hawking  |
| Coleoptera | Staphylinidae   | Euaesthetinae | Euaesthetus        |                  | BOLD:ACG9244 | volant            | Roff 1994       | nocturnal     |                                      | aerial-hawking  |
| Diptera    | Anthomyiidae    |               |                    |                  | BOLD:AAG2490 | volant            | Roff 1990, 1994 | diurnal       | Novella-Fernandez et al. 2020        | gleaning        |
| Diptera    | Tachinidae      | Exoristinae   |                    |                  | BOLD:AAI6325 | volant            | Roff 1990, 1994 | diurnal       | Novella-Fernandez et al. 2020        | gleaning        |
| Diptera    | Tipulidae       | Tipulinae     | Tipula             |                  | BOLD:AAN5045 | volant            | Roff 1990, 1994 | nocturnal     | Mikkola 1972                         | aerial-hawking  |
| Diptera    | Tipulidae       | Tipulinae     | Tipula             |                  | BOLD:AAN9029 | volant            | Roff 1990, 1994 | nocturnal     | Mikkola 1972                         | aerial-hawking  |
| Diptera    | Limoniidae      | Chioneinae    | Teucholabis        |                  | BOLD:AAV2508 | volant            | Roff 1990, 1994 | nocturnal     | Novella-Fernandez et al. 2020        | aerial-hawking  |
| Diptera    | Limoniidae      | Chioneinae    |                    |                  | BOLD:ABA4102 | volant            | Roff 1990, 1994 | nocturnal     | Novella-Fernandez et al. 2020        | aerial-hawking  |
| Diptera    | Cecidomyiidae   |               |                    |                  | BOLD:ABV2094 | volant            | Roff 1990, 1994 | nocturnal     | Scudder & Cannings 2006 (2021/05/19) | aerial-hawking  |
| Diptera    | Limoniidae      |               |                    |                  | BOLD:ABX4369 | volant            | Roff 1990, 1994 | nocturnal     | Novella-Fernandez et al. 2020        | aerial-hawking  |
| Diptera    | Limoniidae      | Limoniinae    | Libnotes           |                  | BOLD:ABY2385 | volant            | Roff 1990, 1994 | nocturnal     | Novella-Fernandez et al. 2020        | aerial-hawking  |

| Order   | Family         | Subfamily      | Genus               | Species   | BIN          | Flight capability | Reference       | Diel activity | Reference                            | Mode of capture |
|---------|----------------|----------------|---------------------|-----------|--------------|-------------------|-----------------|---------------|--------------------------------------|-----------------|
| Diptera | Syrphidae      | Eristalinae    |                     |           | BOLD:ABY2389 | volant            | Roff 1990, 1994 | diurnal       | Novella-Fernandez et al. 2020        | gleaning        |
| Diptera | Tipulidae      | Tipulinae      | Tipula              |           | BOLD:ABY5691 | volant            | Roff 1990, 1994 | nocturnal     | Mikkola 1972                         | aerial-hawking  |
| Diptera | Phoridae       |                |                     |           | BOLD:ACA3150 | volant            | Roff 1990, 1994 | diurnal       | Novella-Fernandez et al. 2020        | gleaning        |
| Diptera | Tachinidae     | Tachininae     | Nemoraea            | takanoi   | BOLD:ACA7375 | volant            | Roff 1990, 1994 | diurnal       | Novella-Fernandez et al. 2020        | gleaning        |
| Diptera | Chironomidae   | Chironominae   | Glyptotendipes      |           | BOLD:ACE3296 | volant            | Roff 1990, 1994 | nocturnal     | Scudder & Cannings 2006 (2021/05/19) | aerial-hawking  |
| Diptera | Tachinidae     |                |                     |           | BOLD:ACF0578 | volant            | Roff 1990, 1994 | diurnal       | Novella-Fernandez et al. 2020        | gleaning        |
| Diptera | Tipulidae      | Tipulinae      | Tipula              |           | BOLD:ACF0878 | volant            | Roff 1990, 1994 | nocturnal     | Mikkola 1972                         | aerial-hawking  |
| Diptera | Phoridae       |                |                     |           | BOLD:ACF6080 | volant            | Roff 1990, 1994 | diurnal       | Novella-Fernandez et al. 2020        | gleaning        |
| Diptera | Sphaeroceridae | Limosiniinae   | Rachispoda          |           | BOLD:ACK2192 | volant            | Roff 1990, 1994 | diurnal       | Novella-Fernandez et al. 2020        | gleaning        |
| Diptera | Chironomidae   |                |                     |           | BOLD:ACK8680 | volant            | Roff 1990, 1994 | nocturnal     | Scudder & Cannings 2006 (2021/05/19) | aerial-hawking  |
| Diptera | Sciaridae      |                |                     |           | BOLD:ACM6077 | volant            | Roff 1990, 1994 | nocturnal     | Novella-Fernandez et al. 2020        | aerial-hawking  |
| Diptera | Simuliidae     |                |                     |           | BOLD:ACM8222 | volant            | Roff 1990, 1994 | nocturnal     | Novella-Fernandez et al. 2020        | aerial-hawking  |
| Diptera | Limoniidae     |                |                     |           | BOLD:ACN0178 | volant            | Roff 1990, 1994 | nocturnal     | Novella-Fernandez et al. 2020        | aerial-hawking  |
| Diptera | Limoniidae     |                |                     |           | BOLD:ACN0238 | volant            | Roff 1990, 1994 | nocturnal     | Novella-Fernandez et al. 2020        | aerial-hawking  |
| Diptera | Mycetophilidae |                |                     |           | BOLD:ACN0859 | volant            | Roff 1990, 1994 | nocturnal     | Mikkola 1972                         | aerial-hawking  |
| Diptera | Calliphoridae  |                |                     |           | BOLD:ACN1515 | volant            | Roff 1990, 1994 |               | Novella-Fernandez et al. 2020        | gleaning        |
| Diptera | Psychodidae    |                |                     |           | BOLD:ACN3276 | volant            | Roff 1990, 1994 | nocturnal     | Scudder & Cannings 2006 (2021/05/19) | aerial-hawking  |
| Diptera | Drosophilidae  |                |                     |           | BOLD:ACN4805 | volant            | Roff 1990, 1994 | diurnal       | Novella-Fernandez et al. 2020        | gleaning        |
| Diptera |                |                |                     |           | BOLD:ACN5240 | volant            | Roff 1990, 1994 | undecided     |                                      | undecided       |
| Diptera | Limoniidae     |                |                     |           | BOLD:ACN5325 | volant            | Roff 1990, 1994 | nocturnal     | Novella-Fernandez et al. 2020        | aerial-hawking  |
| Diptera | Phoridae       |                |                     |           | BOLD:ACO0272 | volant            | Roff 1990, 1994 | diurnal       | Novella-Fernandez et al. 2020        | gleaning        |
| Diptera | Chironomidae   |                |                     |           | BOLD:ACO4488 | volant            | Roff 1990, 1994 | nocturnal     | Scudder & Cannings 2006 (2021/05/19) | aerial-hawking  |
| Diptera |                |                |                     |           | BOLD:ACP6542 | volant            | Roff 1990, 1994 | undecided     |                                      | undecided       |
| Diptera | Chloropidae    |                |                     |           | BOLD:ACR0489 | volant            | Roff 1990, 1994 | diurnal       | Novella-Fernandez et al. 2020        | gleaning        |
| Diptera | Muscidae       |                |                     |           | BOLD:ACT7328 | volant            | Roff 1990, 1994 | diurnal       | Novella-Fernandez et al. 2020        | gleaning        |
| Diptera | Sciaridae      |                |                     |           | BOLD:ACU8386 | volant            | Roff 1990, 1994 | nocturnal     | Novella-Fernandez et al. 2020        | aerial-hawking  |
| Diptera | Muscidae       | Phaoniinae     | Helina              |           | BOLD:ACV2533 | volant            | Roff 1990, 1994 | diurnal       | Novella-Fernandez et al. 2020        | gleaning        |
| Diptera | Psychodidae    |                |                     |           | BOLD:ACW2931 | volant            | Roff 1990, 1994 | nocturnal     | Scudder & Cannings 2006 (2021/05/19) | aerial-hawking  |
| Diptera | Agromyzidae    |                |                     |           | BOLD:AAV4874 | volant            | Roff 1990, 1994 | diurnal       | Weintraub & Horowitz 1996            | gleaning        |
| Diptera | Anthomyiidae   | Anthomyiinae   | Botanophila         |           | BOLD:AAG2502 | volant            | Roff 1990, 1994 | diurnal       | Novella-Fernandez et al. 2020        | gleaning        |
| Diptera | Anthomyiidae   | Anthomyiinae   | Lasiomma            |           | BOLD:ACK1581 | volant            | Roff 1990, 1994 | diurnal       | Novella-Fernandez et al. 2020        | gleaning        |
| Diptera | Anthomyiidae   | Anthomyiinae   | Delia               | platura   | BOLD:AAG2511 | volant            | Roff 1990, 1994 | diurnal       | Novella-Fernandez et al. 2020        | gleaning        |
| Diptera | Anthomyiidae   | Anthomyiinae   | Botanophila         | profuga   | BOLD:ACP6334 | volant            | Roff 1990, 1994 | diurnal       | Novella-Fernandez et al. 2020        | gleaning        |
| Diptera | Bolitophilidae | NA             | Bolitophila         |           | BOLD:AAM9007 | volant            | Roff 1990, 1994 | undecided     |                                      | undecided       |
| Diptera | Cecidomyiidae  |                |                     |           | BOLD:ACP9491 | volant            | Roff 1990, 1994 | nocturnal     | Scudder & Cannings 2006 (2021/05/19) | aerial-hawking  |
| Diptera | Cecidomyiidae  |                |                     |           | BOLD:ACU9836 | volant            | Roff 1990, 1994 | nocturnal     | Scudder & Cannings 2006 (2021/05/19) | aerial-hawking  |
| Diptera | Cecidomyiidae  | Cecidomyiinae  | Feltiella           | acarisuga | BOLD:ACD4136 | volant            | Roff 1990, 1994 | nocturnal     | Scudder & Cannings 2006 (2021/05/19) | aerial-hawking  |
| Diptera | Chamaemyiidae  |                |                     |           | BOLD:ACC5885 | volant            | Roff 1990, 1994 |               | Novella-Fernandez et al. 2020        | gleaning        |
| Diptera | Chironomidae   | Diamesinae     | Diamesa             |           | BOLD:AAB5106 | volant            | Roff 1990, 1994 | nocturnal     | Scudder & Cannings 2006 (2021/05/19) | aerial-hawking  |
| Diptera | Chironomidae   | Orthocladiinae | Heterotrissocladius | marcidus  | BOLD:AAF2163 | volant            | Roff 1990, 1994 | nocturnal     | Scudder & Cannings 2006 (2021/05/19) | aerial-hawking  |
| Diptera | Chironomidae   | Orthocladiinae | Eukiefferiella      |           | BOLD:AAI5126 | volant            | Roff 1990, 1994 | nocturnal     | Scudder & Cannings 2006 (2021/05/19) | aerial-hawking  |
| Diptera |                |                |                     |           | BOLD:ACQ9269 | volant            | Roff 1990, 1994 | undecided     |                                      | undecided       |
| Diptera | Chironomidae   | Orthocladiinae | Cricotopus          | bicinctus | BOLD:AAT9677 | volant            | Roff 1990, 1994 | nocturnal     | Scudder & Cannings 2006 (2021/05/19) | aerial-hawking  |

| Order   | Family          | Subfamily       | Genus        | Species    | BIN          | Flight capability | Reference       | Diel activity | Reference                            | Mode of capture |
|---------|-----------------|-----------------|--------------|------------|--------------|-------------------|-----------------|---------------|--------------------------------------|-----------------|
| Diptera | Chironomidae    |                 |              |            | BOLD:ACB8882 | volant            | Roff 1990, 1994 | nocturnal     | Scudder & Cannings 2006 (2021/05/19) | aerial-hawking  |
| Diptera | Chironomidae    |                 |              |            | BOLD:ACF6427 | volant            | Roff 1990, 1994 | nocturnal     | Scudder & Cannings 2006 (2021/05/19) | aerial-hawking  |
| Diptera | Chironomidae    | Diamesinae      |              |            | BOLD:ACK5496 | volant            | Roff 1990, 1994 | nocturnal     | Scudder & Cannings 2006 (2021/05/19) | aerial-hawking  |
| Diptera | Chloropidae     | Oscinellinae    |              |            | BOLD:AAN5657 | volant            | Roff 1990, 1994 | diurnal       | Novella-Fernandez et al. 2020        | gleaning        |
| Diptera | Chloropidae     |                 |              |            | BOLD:ADC9928 | volant            | Roff 1990, 1994 | diurnal       | Novella-Fernandez et al. 2020        | gleaning        |
| Diptera | Culicidae       | Culicinae       |              |            | BOLD:AAF2904 | volant            | Roff 1990, 1994 | nocturnal     | Mikkola 1972                         | aerial-hawking  |
| Diptera | Culicidae       | Culicinae       | Culex        | orientalis | BOLD:ACB9306 | volant            | Roff 1990, 1994 | nocturnal     | Mikkola 1972                         | aerial-hawking  |
| Diptera | Culicidae       | Culicinae       | Culex        |            | BOLD:AAA4751 | volant            | Roff 1990, 1994 | nocturnal     | Mikkola 1972                         | aerial-hawking  |
| Diptera | Cylindrotomidae | Cylindrotominae | Cylindrotoma |            | BOLD:AAD0770 | volant            | Roff 1990, 1994 | undecided     |                                      | undecided       |
| Diptera | Drosophilidae   | Drosophilinae   | Drosophila   |            | BOLD:AA0127  | volant            | Roff 1990, 1994 | diurnal       | Novella-Fernandez et al. 2020        | gleaning        |
| Diptera | Drosophilidae   | Drosophilinae   | Drosophila   |            | BOLD:ADH1432 | volant            | Roff 1990, 1994 | diurnal       | Novella-Fernandez et al. 2020        | gleaning        |
| Diptera | Drosophilidae   | Steganinae      | Leucophenga  |            | BOLD:ACA1411 | volant            | Roff 1990, 1994 | diurnal       | Novella-Fernandez et al. 2020        | gleaning        |
| Diptera | Ephydriidae     |                 |              |            | BOLD:ACS0447 | volant            | Roff 1990, 1994 |               | Novella-Fernandez et al. 2020        | gleaning        |
| Diptera | Hybotidae       | Tachydromiinae  | Chersodromia |            | BOLD:ACJ9160 | volant            | Roff 1990, 1994 |               | Novella-Fernandez et al. 2020        | aerial-hawking  |
| Diptera | Keroplattidae   |                 |              |            | BOLD:AAG4943 | volant            | Roff 1990, 1994 |               | Novella-Fernandez et al. 2020        | aerial-hawking  |
| Diptera | Limoniidae      | Limoniinae      | Antocha      | bifida     | BOLD:AAW5955 | volant            | Roff 1990, 1994 | nocturnal     | Novella-Fernandez et al. 2020        | aerial-hawking  |
| Diptera | Limoniidae      | Limoniinae      | Dicranomyia  | frontalis  | BOLD:ABA5203 | volant            | Roff 1990, 1994 | nocturnal     | Novella-Fernandez et al. 2020        | aerial-hawking  |
| Diptera | Limoniidae      | Limoniinae      | Dicranomyia  |            | BOLD:ABW0212 | volant            | Roff 1990, 1994 | nocturnal     | Novella-Fernandez et al. 2020        | aerial-hawking  |
| Diptera | Limoniidae      |                 |              |            | BOLD:ABV4791 | volant            | Roff 1990, 1994 | nocturnal     | Novella-Fernandez et al. 2020        | aerial-hawking  |
| Diptera | Limoniidae      |                 |              |            | BOLD:ACS9407 | volant            | Roff 1990, 1994 | nocturnal     | Novella-Fernandez et al. 2020        | aerial-hawking  |
| Diptera | Limoniidae      | Limoniinae      | Discobola    |            | BOLD:ABW4922 | volant            | Roff 1990, 1994 | nocturnal     | Novella-Fernandez et al. 2020        | aerial-hawking  |
| Diptera | Limoniidae      | Limoniinae      | Libnotes     |            | BOLD:ABW9478 | volant            | Roff 1990, 1994 | nocturnal     | Novella-Fernandez et al. 2020        | aerial-hawking  |
| Diptera | Limoniidae      | Limoniinae      | Dicranomyia  |            | BOLD:AAO3939 | volant            | Roff 1990, 1994 | nocturnal     | Novella-Fernandez et al. 2020        | aerial-hawking  |
| Diptera | Limoniidae      | Limoniinae      | Dicranomyia  |            | FINTI487-12  | volant            | Roff 1990, 1994 | nocturnal     | Novella-Fernandez et al. 2020        | aerial-hawking  |
| Diptera | Limoniidae      | Limoniinae      | Metalimnobia |            | BOLD:ABU9381 | volant            | Roff 1990, 1994 | nocturnal     | Novella-Fernandez et al. 2020        | aerial-hawking  |
| Diptera | Limoniidae      | Limoniinae      | Metalimnobia |            | BOLD:AAX5093 | volant            | Roff 1990, 1994 | nocturnal     | Novella-Fernandez et al. 2020        | aerial-hawking  |
| Diptera | Limoniidae      | Limoniinae      | Rhipidia     | maculata   | BOLD:ACB7799 | volant            | Roff 1990, 1994 | nocturnal     | Novella-Fernandez et al. 2020        | aerial-hawking  |
| Diptera | Lonchopteridae  | NA              | Lonchoptera  |            | BOLD:ACB6694 | volant            | Roff 1990, 1994 | nocturnal     | Novella-Fernandez et al. 2020        | aerial-hawking  |
| Diptera | Muscidae        |                 |              |            | BOLD:AAG1765 | volant            | Roff 1990, 1994 | diurnal       | Novella-Fernandez et al. 2020        | gleaning        |
| Diptera | Muscidae        |                 |              |            | BOLD:ACD2056 | volant            | Roff 1990, 1994 | diurnal       | Novella-Fernandez et al. 2020        | gleaning        |
| Diptera | Muscidae        | Phaoniinae      | Helina       | obscurata  | BOLD:AAE6931 | volant            | Roff 1990, 1994 | diurnal       | Novella-Fernandez et al. 2020        | gleaning        |
| Diptera | Muscidae        | Azeliinae       | Muscina      | pascuorum  | BOLD:AAG1714 | volant            | Roff 1990, 1994 | diurnal       | Novella-Fernandez et al. 2020        | gleaning        |
| Diptera | Muscidae        |                 |              |            | BOLD:ACR5608 | volant            | Roff 1990, 1994 | diurnal       | Novella-Fernandez et al. 2020        | gleaning        |
| Diptera | Muscidae        |                 |              |            | BOLD:AAX1493 | volant            | Roff 1990, 1994 | diurnal       | Novella-Fernandez et al. 2020        | gleaning        |
| Diptera | Muscidae        | Azeliinae       | Hydrotaea    | armipes    | BOLD:AAG6908 | volant            | Roff 1990, 1994 | diurnal       | Novella-Fernandez et al. 2020        | gleaning        |
| Diptera | Muscidae        | Phaoniinae      | Phaonia      |            | BOLD:AAG1772 | volant            | Roff 1990, 1994 | diurnal       | Novella-Fernandez et al. 2020        | gleaning        |
| Diptera | Muscidae        | Phaoniinae      | Phaonia      |            | BOLD:AAP8142 | volant            | Roff 1990, 1994 | diurnal       | Novella-Fernandez et al. 2020        | gleaning        |
| Diptera | Muscidae        | Azeliinae       | Hydrotaea    | glabricula | BOLD:ADK1195 | volant            | Roff 1990, 1994 | diurnal       | Novella-Fernandez et al. 2020        | gleaning        |
| Diptera | Muscidae        | Azeliinae       | Potamia      | littoralis | BOLD:ACQ0523 | volant            | Roff 1990, 1994 | diurnal       | Novella-Fernandez et al. 2020        | gleaning        |
| Diptera | Muscidae        | Azeliinae       | Thricops     | diaphanus  | BOLD:AAG1710 | volant            | Roff 1990, 1994 | diurnal       | Novella-Fernandez et al. 2020        | gleaning        |
| Diptera | Mycetophilidae  | Mycetophilinae  | Platurocypta |            | BOLD:ACC5656 | volant            | Roff 1990, 1994 | nocturnal     | Mikkola 1972                         | aerial-hawking  |
| Diptera | Pediciidae      | Uliinae         | Ula          |            | BOLD:AAV1814 | volant            | Roff 1990, 1994 | nocturnal     | Novella-Fernandez et al. 2020        | aerial-hawking  |
| Diptera | Pediciidae      | Pediciinae      | Dicranota    |            | BOLD:ABW5265 | volant            | Roff 1990, 1994 | nocturnal     | Novella-Fernandez et al. 2020        | aerial-hawking  |

| Order       | Family         | Subfamily       | Genus         | Species     | BIN          | Flight capability | Reference       | Diel activity | Reference                            | Mode of capture |
|-------------|----------------|-----------------|---------------|-------------|--------------|-------------------|-----------------|---------------|--------------------------------------|-----------------|
| Diptera     | Pediciidae     | Uliinae         | Ula           | bolitophila | BOLD:ABU5946 | volant            | Roff 1990, 1994 | nocturnal     | Novella-Fernandez et al. 2020        | aerial-hawking  |
| Diptera     | Pediciidae     | Uliinae         | Ula           |             | BOLD:ABA7462 | volant            | Roff 1990, 1994 | nocturnal     | Novella-Fernandez et al. 2020        | aerial-hawking  |
| Diptera     | Periscelididae |                 |               |             | BOLD:ADE5755 | volant            | Roff 1990, 1994 | undecided     |                                      | undecided       |
| Diptera     | Phoridae       |                 |               |             | BOLD:AAP6413 | volant            | Roff 1990, 1994 | diurnal       | Novella-Fernandez et al. 2020        | gleaning        |
| Diptera     | Psychodidae    |                 |               |             | BOLD:ACO7340 | volant            | Roff 1990, 1994 | nocturnal     | Scudder & Cannings 2006 (2021/05/19) | aerial-hawking  |
| Diptera     | Psychodidae    |                 |               |             | BOLD:ADE7332 | volant            | Roff 1990, 1994 | nocturnal     | Scudder & Cannings 2006 (2021/05/19) | aerial-hawking  |
| Diptera     | Psychodidae    |                 |               |             | BOLD:ADE8063 | volant            | Roff 1990, 1994 | nocturnal     | Scudder & Cannings 2006 (2021/05/19) | aerial-hawking  |
| Diptera     | Psychodidae    | Psychodinae     | Psychoda      |             | BOLD:AAL7819 | volant            | Roff 1990, 1994 | nocturnal     | Scudder & Cannings 2006 (2021/05/19) | aerial-hawking  |
| Diptera     | Psychodidae    | Psychodinae     | Psychoda      |             | BOLD:ACD9559 | volant            | Roff 1990, 1994 | nocturnal     | Scudder & Cannings 2006 (2021/05/19) | aerial-hawking  |
| Diptera     | Sarcophagidae  |                 |               |             | BOLD:ACU3079 | volant            | Roff 1990, 1994 | diurnal       | Novella-Fernandez et al. 2020        | gleaning        |
| Diptera     | Sciaridae      |                 |               |             | BOLD:ACC1760 | volant            | Roff 1990, 1994 | nocturnal     | Novella-Fernandez et al. 2020        | aerial-hawking  |
| Diptera     | Sciaridae      |                 |               |             | BOLD:ACI7364 | volant            | Roff 1990, 1994 | nocturnal     | Novella-Fernandez et al. 2020        | aerial-hawking  |
| Diptera     | Simuliidae     | Simuliinae      | Simulium      |             | BOLD:ABA1846 | volant            | Roff 1990, 1994 | nocturnal     | Novella-Fernandez et al. 2020        | aerial-hawking  |
| Diptera     | Sphaeroceridae | Limosiniinae    | Opalimosina   | mirabilis   | BOLD:AAN6406 | volant            | Roff 1990, 1994 | diurnal       | Novella-Fernandez et al. 2020        | gleaning        |
| Diptera     | Syrphidae      | Eristalinae     | Ferdinandea   | cuprea      | BOLD:AAJ0402 | volant            | Roff 1990, 1994 | diurnal       | Novella-Fernandez et al. 2020        | gleaning        |
| Diptera     | Tachinidae     | Exoristinae     | Cyzenis       |             | BOLD:AAP4829 | volant            | Roff 1990, 1994 | diurnal       | Novella-Fernandez et al. 2020        | gleaning        |
| Diptera     | Tachinidae     | Exoristinae     | Drino         |             | BOLD:AAB6198 | volant            | Roff 1990, 1994 | diurnal       | Novella-Fernandez et al. 2020        | gleaning        |
| Diptera     | Tachinidae     | Exoristinae     |               |             | BOLD:AAN9266 | volant            | Roff 1990, 1994 | diurnal       | Novella-Fernandez et al. 2020        | gleaning        |
| Diptera     | Tachinidae     | Exoristinae     | Cadurciella   | tritaeniata | BOLD:AAN9651 | volant            | Roff 1990, 1994 | diurnal       | Novella-Fernandez et al. 2020        | gleaning        |
| Diptera     | Tachinidae     | Exoristinae     | Phebellia     | villica     | BOLD:ACB0760 | volant            | Roff 1990, 1994 | diurnal       | Novella-Fernandez et al. 2020        | gleaning        |
| Diptera     | Tachinidae     |                 |               |             | BOLD:AAZ8670 | volant            | Roff 1990, 1994 | diurnal       | Novella-Fernandez et al. 2020        | gleaning        |
| Diptera     | Tachinidae     | Exoristinae     |               |             | BOLD:AAC1692 | volant            | Roff 1990, 1994 | diurnal       | Novella-Fernandez et al. 2020        | gleaning        |
| Diptera     | Tipulidae      | Tipulinae       | Tipula        | kuzuensis   | BOLD:AAN9034 | volant            | Roff 1990, 1994 | nocturnal     | Mikkola 1972                         | aerial-hawking  |
| Diptera     | Tipulidae      | Tipulinae       | Tipula        |             | BOLD:ABV3695 | volant            | Roff 1990, 1994 | nocturnal     | Mikkola 1972                         | aerial-hawking  |
| Diptera     | Tipulidae      | Tipulinae       | Tipula        |             | BOLD:ABV4667 | volant            | Roff 1990, 1994 | nocturnal     | Mikkola 1972                         | aerial-hawking  |
| Diptera     | Tipulidae      | Tipulinae       | Tipula        |             | TIPTW088-10  | volant            | Roff 1990, 1994 | nocturnal     | Mikkola 1972                         | aerial-hawking  |
| Diptera     | Tipulidae      |                 |               |             | TIPTW093-10  | volant            | Roff 1990, 1994 | nocturnal     | Mikkola 1972                         | aerial-hawking  |
| Diptera     | Trichoceridae  | Trichocerinae   | Trichocera    |             | BOLD:ACF7745 | volant            | Roff 1990, 1994 | diurnal       | Scudder & Cannings 2006 (2021/05/19) | gleaning        |
| Hemiptera   | Pentatomidae   |                 |               |             | BOLD:AAP3528 | volant            | Roff 1994       | diurnal       | Capinera 2008                        | gleaning        |
| Hemiptera   | Cicadellidae   | Deltocephalinae |               |             | BOLD:AAG8956 | volant            | Roff 1994       | diurnal       | Capinera 2008                        | gleaning        |
| Hemiptera   | Cicadidae      | Cicadinae       | Yezoterpnosia | nigricosta  | BOLD:ACP9813 | volant            | Roff 1990       | diurnal       | Capinera 2008                        | gleaning        |
| Hemiptera   | Psyllidae      |                 |               |             | BOLD:ACM6872 | volant            | Roff 1994       | diurnal       | Capinera 2008                        | gleaning        |
| Hymenoptera | Cimbicidae     | Cimbicinae      | Trichiosoma   |             | BOLD:ACJ7002 | volant            | Roff 1990       | diurnal       |                                      | gleaning        |
| Hymenoptera | Cimbicidae     | Cimbicinae      | Trichiosoma   |             | BOLD:ABZ2163 | volant            | Roff 1990       | diurnal       |                                      | gleaning        |
| Hymenoptera | Ichneumonidae  |                 |               |             | BOLD:ADI1279 | volant            | Roff 1990       | nocturnal     | Mikkola 1972                         | aerial-hawking  |
| Hymenoptera | Pamphiliidae   | Pamphiliinae    | Neurotoma     | nemoralis   | BOLD:AAV6346 | volant            | Roff 1990       | diurnal       |                                      | gleaning        |
| Hymenoptera | Pamphiliidae   | Pamphiliinae    | Pamphilius    |             | BOLD:AAK4614 | volant            | Roff 1990       | diurnal       |                                      | gleaning        |
| Hymenoptera |                |                 |               |             | EII067-15    | volant            | Roff 1990       | undecided     |                                      | undecided       |
| Hymenoptera |                |                 |               |             | EII104-15    | volant            | Roff 1990       | undecided     |                                      | undecided       |
| Hymenoptera | Tenthredinidae | Nematinae       | Pristiphora   |             | BOLD:AAK9450 | volant            | Roff 1990       | diurnal       | Novella-Fernandez et al. 2020        | gleaning        |
| Lepidoptera | Coleophoridae  | Coleophorinae   | Coleophora    |             | BOLD:AAC8694 | volant            | Roff 1994       | diurnal       | Capinera 2008                        | gleaning        |
| Lepidoptera | Crambidae      | Scopariinae     | Eudonia       | persimilis  | BOLD:AAF1478 | volant            | Roff 1994       | nocturnal     | Capinera 2008                        | aerial-hawking  |
| Lepidoptera |                |                 |               |             | BOLD:AAF8577 | volant            | Roff 1994       | undecided     |                                      | undecided       |

| Order       | Family          | Subfamily       | Genus         | Species         | BIN          | Flight capability | Reference | Diel activity | Reference            | Mode of capture |
|-------------|-----------------|-----------------|---------------|-----------------|--------------|-------------------|-----------|---------------|----------------------|-----------------|
| Lepidoptera |                 |                 |               |                 | BOLD:AAG6034 | volant            | Roff 1994 | undecided     |                      | undecided       |
| Lepidoptera | Erebidae        | Arctiinae       |               |                 | BOLD:AAH2626 | volant            | Roff 1994 | diurnal       | Kawahara et al. 2017 | gleaning        |
| Lepidoptera | Gelechiidae     | Gelechiinae     |               |                 | BOLD:AAH5654 | volant            | Roff 1994 | nocturnal     | Kawahara et al. 2017 | aerial-hawking  |
| Lepidoptera | Noctuidae       | Noctuinae       |               |                 | BOLD:AAI3519 | volant            | Roff 1994 | nocturnal     | Capinera 2008        | aerial-hawking  |
| Lepidoptera | Erebidae        |                 |               |                 | BOLD:AAL4384 | volant            | Roff 1994 | nocturnal     | Kawahara et al. 2017 | aerial-hawking  |
| Lepidoptera | Crambidae       | Spilomelinae    | Pleuroptya    | expictalis      | BOLD:AAL4502 | volant            | Roff 1994 | nocturnal     | Capinera 2008        | aerial-hawking  |
| Lepidoptera | Erebidae        | Boletobiinae    | Enispa        |                 | BOLD:AAL7095 | volant            | Roff 1994 | nocturnal     | Kawahara et al. 2017 | aerial-hawking  |
| Lepidoptera | Noctuidae       | Noctuinae       |               |                 | BOLD:AAM0480 | volant            | Roff 1994 | nocturnal     | Capinera 2008        | aerial-hawking  |
| Lepidoptera | Notodontidae    | Notodontinae    | Cerura        |                 | BOLD:AAM4552 | volant            | Roff 1994 | nocturnal     | Capinera 2008        | aerial-hawking  |
| Lepidoptera | Noctuidae       |                 |               |                 | BOLD:AAM9055 | volant            | Roff 1994 | nocturnal     | Capinera 2008        | aerial-hawking  |
| Lepidoptera | Noctuidae       | Noctuinae       |               |                 | BOLD:AAM9761 | volant            | Roff 1994 | nocturnal     | Capinera 2008        | aerial-hawking  |
| Lepidoptera | Crambidae       | Pyraustinae     | Goniorhynchus |                 | BOLD:AAN3555 | volant            | Roff 1994 | nocturnal     | Capinera 2008        | aerial-hawking  |
| Lepidoptera | Hesperiidae     |                 |               |                 | BOLD:AAN7248 | volant            | Roff 1994 | diurnal       | Capinera 2008        | gleaning        |
| Lepidoptera | Noctuidae       |                 |               |                 | BOLD:AAP1728 | volant            | Roff 1994 | nocturnal     | Capinera 2008        | aerial-hawking  |
| Lepidoptera | Geometridae     | Ennominae       |               |                 | BOLD:AAP2372 | volant            | Roff 1994 | nocturnal     | Capinera 2008        | aerial-hawking  |
| Lepidoptera | Gelechiidae     |                 |               |                 | BOLD:AAQ1460 | volant            | Roff 1994 | nocturnal     | Kawahara et al. 2017 | aerial-hawking  |
| Lepidoptera | Crambidae       | Spilomelinae    |               |                 | BOLD:AAQ2087 | volant            | Roff 1994 | nocturnal     | Capinera 2008        | aerial-hawking  |
| Lepidoptera | Geometridae     | Sterrhinae      | Scopula       |                 | BOLD:AAV8961 | volant            | Roff 1994 | nocturnal     | Capinera 2008        | aerial-hawking  |
| Lepidoptera | Erebidae        | Arctiinae       |               |                 | BOLD:AAV5858 | volant            | Roff 1994 | diurnal       | Kawahara et al. 2017 | gleaning        |
| Lepidoptera | Limacodidae     |                 |               |                 | BOLD:AAZ8422 | volant            | Roff 1994 | nocturnal     | Capinera 2008        | aerial-hawking  |
| Lepidoptera | Tortricidae     | Olethreutinae   | Rhopobota     |                 | BOLD:ABA8634 | volant            | Roff 1994 | nocturnal     | Kawahara et al. 2017 | aerial-hawking  |
| Lepidoptera | Geometridae     | Larentiinae     | Leptostegna   |                 | BOLD:ABU5788 | volant            | Roff 1994 | nocturnal     | Capinera 2008        | aerial-hawking  |
| Lepidoptera | Sphingidae      | Smerinthinae    | Marumba       | gaschkewitschii | BOLD:ABU7231 | volant            | Roff 1994 | nocturnal     | Capinera 2008        | aerial-hawking  |
| Lepidoptera |                 |                 |               |                 | BOLD:ABU9226 | volant            | Roff 1994 | undecided     |                      | undecided       |
| Lepidoptera | Tortricidae     |                 |               |                 | BOLD:ABW0658 | volant            | Roff 1994 | nocturnal     | Kawahara et al. 2017 | aerial-hawking  |
| Lepidoptera | Erebidae        | Arctiinae       | Cyana         |                 | BOLD:ABX3752 | volant            | Roff 1994 | diurnal       | Kawahara et al. 2017 | gleaning        |
| Lepidoptera | Erebidae        | Erebinae        | Catocala      |                 | BOLD:ABZ3190 | volant            | Roff 1994 | nocturnal     | Kawahara et al. 2017 | aerial-hawking  |
| Lepidoptera | Erebidae        | Arctiinae       |               |                 | BOLD:ACB1726 | volant            | Roff 1994 | diurnal       | Kawahara et al. 2017 | gleaning        |
| Lepidoptera | Geometridae     | Geometrinae     |               |                 | BOLD:ACE9755 | volant            | Roff 1994 | nocturnal     | Capinera 2008        | aerial-hawking  |
| Lepidoptera | Autostichidae   |                 |               |                 | BOLD:ACF7812 | volant            | Roff 1994 | nocturnal     | Kawahara et al. 2017 | aerial-hawking  |
| Lepidoptera | Cosmopterigidae |                 |               |                 | BOLD:ACJ1842 | volant            | Roff 1994 | diurnal       | Capinera 2008        | gleaning        |
| Lepidoptera | Gelechiidae     | Gelechiinae     | Sophronia     |                 | BOLD:ACL1953 | volant            | Roff 1994 | nocturnal     | Kawahara et al. 2017 | aerial-hawking  |
| Lepidoptera | Geometridae     | Ennominae       |               |                 | BOLD:ACL6993 | volant            | Roff 1994 | nocturnal     | Capinera 2008        | aerial-hawking  |
| Lepidoptera |                 |                 |               |                 | BOLD:ACM3459 | volant            | Roff 1994 | undecided     |                      | undecided       |
| Lepidoptera | Elachistidae    |                 |               |                 | BOLD:ACM9615 | volant            | Roff 1994 | nocturnal     | Capinera 2008        | aerial-hawking  |
| Lepidoptera | Tortricidae     |                 |               |                 | BOLD:ACN0142 | volant            | Roff 1994 | nocturnal     | Kawahara et al. 2017 | aerial-hawking  |
| Lepidoptera | Gelechiidae     |                 |               |                 | BOLD:ACN0185 | volant            | Roff 1994 | nocturnal     | Kawahara et al. 2017 | aerial-hawking  |
| Lepidoptera | Tortricidae     | Tortricinae     | Choristoneura |                 | BOLD:ACN0625 | volant            | Roff 1994 | nocturnal     | Kawahara et al. 2017 | aerial-hawking  |
| Lepidoptera | Erebidae        | Herminiinae     |               |                 | BOLD:ACO1434 | volant            | Roff 1994 | nocturnal     | Kawahara et al. 2017 | aerial-hawking  |
| Lepidoptera | Lasiocampidae   | Poecilocampinae |               |                 | BOLD:ACP2255 | volant            | Roff 1994 | nocturnal     | Capinera 2008        | aerial-hawking  |
| Lepidoptera | Gelechiidae     |                 |               |                 | BOLD:ACR6168 | volant            | Roff 1994 | nocturnal     | Kawahara et al. 2017 | aerial-hawking  |
| Lepidoptera | Stathmopodidae  | NA              | Stathmopoda   |                 | BOLD:ACV9615 | volant            | Roff 1994 | diurnal       | Kawahara et al. 2017 | gleaning        |
| Lepidoptera |                 |                 |               |                 | BOLD:ACW1375 | volant            | Roff 1994 | undecided     |                      | undecided       |

| Order       | Family         | Subfamily      | Genus       | Species     | BIN          | Flight capability | Reference | Diel activity | Reference                 | Mode of capture |
|-------------|----------------|----------------|-------------|-------------|--------------|-------------------|-----------|---------------|---------------------------|-----------------|
| Lepidoptera |                |                |             |             | BOLD:ACX5590 | volant            | Roff 1994 | undecided     |                           | undecided       |
| Lepidoptera | Crambidae      |                |             |             | BOLD:ACX6648 | volant            | Roff 1994 | nocturnal     | Capinera 2008             | aerial-hawking  |
| Lepidoptera |                |                |             |             | BOLD:ADF8756 | volant            | Roff 1994 | undecided     |                           | undecided       |
| Lepidoptera |                |                |             |             | BOLD:ADG3051 | volant            | Roff 1994 | undecided     |                           | undecided       |
| Lepidoptera |                |                |             |             | BOLD:ADI1550 | volant            | Roff 1994 | undecided     |                           | undecided       |
| Lepidoptera | Tortricidae    | Tortricinae    | Acleris     | paradiseana | BOLD:ADI2826 | volant            | Roff 1994 | nocturnal     | Kawahara et al. 2017      | aerial-hawking  |
| Lepidoptera |                |                |             |             | BOLD:ADI2961 | volant            | Roff 1994 | undecided     |                           | undecided       |
| Lepidoptera |                |                |             |             | BOLD:ADI4331 | volant            | Roff 1994 | undecided     |                           | undecided       |
| Lepidoptera | Geometridae    | Sterrhinae     | Scopula     |             | BOLD:ADI7455 | volant            | Roff 1994 | nocturnal     | Capinera 2008             | aerial-hawking  |
| Lepidoptera | Geometridae    | Sterrhinae     | Scopula     |             | BOLD:ADJ2221 | volant            | Roff 1994 | nocturnal     | Capinera 2008             | aerial-hawking  |
| Lepidoptera |                |                |             |             | GWOSS664-11  | volant            | Roff 1994 | undecided     |                           | undecided       |
| Lepidoptera | Geometridae    | Geometrinae    |             |             | NAGEO164-09  | volant            | Roff 1994 | nocturnal     | Capinera 2008             | aerial-hawking  |
| Lepidoptera | Autostichidae  | Autostichinae  |             |             | BOLD:AAC7842 | volant            | Roff 1994 | nocturnal     | Kawahara et al. 2017      | aerial-hawking  |
| Lepidoptera | Blastobasidae  | Blastobasinae  | Hypatopa    |             | BOLD:AAB9632 | volant            | Roff 1994 | nocturnal     | Capinera 2008             | aerial-hawking  |
| Lepidoptera | Blastobasidae  | Blastobasinae  |             |             | BOLD:AA6193  | volant            | Roff 1994 | nocturnal     | Capinera 2008             | aerial-hawking  |
| Lepidoptera | Coleophoridae  | Coleophorinae  | Coleophora  |             | BOLD:AAB8487 | volant            | Roff 1994 | diurnal       | Capinera 2008             | gleaning        |
| Lepidoptera | Crambidae      | Pyraustinae    | Pyrausta    |             | BOLD:AAD0032 | volant            | Roff 1994 | nocturnal     | Capinera 2008             | aerial-hawking  |
| Lepidoptera |                |                |             |             | BOLD:ACM1938 | volant            | Roff 1994 | undecided     |                           | undecided       |
| Lepidoptera | Crambidae      | Acentropinae   | Nymphula    |             | BOLD:AAF2874 | volant            | Roff 1994 | nocturnal     | Capinera 2008             | aerial-hawking  |
| Lepidoptera | Crambidae      | Spilomelinae   | Palpita     |             | BOLD:AAD6468 | volant            | Roff 1994 | nocturnal     | Capinera 2008             | aerial-hawking  |
| Lepidoptera | Crambidae      | Spilomelinae   |             |             | BOLD:AAB6255 | volant            | Roff 1994 | nocturnal     | Capinera 2008             | aerial-hawking  |
| Lepidoptera | Crambidae      | Spilomelinae   | Pleuroptya  |             | BOLD:AAB6257 | volant            | Roff 1994 | nocturnal     | Capinera 2008             | aerial-hawking  |
| Lepidoptera | Depressariidae |                |             |             | BOLD:AA5033  | volant            | Roff 1994 | nocturnal     | Kawahara et al. 2017      | aerial-hawking  |
| Lepidoptera | Depressariidae | Depressariinae | Agonopterix |             | BOLD:AAF7176 | volant            | Roff 1994 | nocturnal     | Kawahara et al. 2017      | aerial-hawking  |
| Lepidoptera | Depressariidae | Depressariinae | Depressaria |             | BOLD:ACN1500 | volant            | Roff 1994 | nocturnal     | Kawahara et al. 2017      | aerial-hawking  |
| Lepidoptera | Depressariidae |                |             |             | BOLD:ACE7937 | volant            | Roff 1994 | nocturnal     | Kawahara et al. 2017      | aerial-hawking  |
| Lepidoptera | Drepanidae     | Thyatirinae    | Tetheella   | fluctuosa   | BOLD:AAD3647 | volant            | Roff 1994 | nocturnal     | Capinera 2008             | aerial-hawking  |
| Lepidoptera | Erebidae       |                |             |             | BOLD:AAB7538 | volant            | Roff 1994 | nocturnal     | Kawahara et al. 2017      | aerial-hawking  |
| Lepidoptera | Erebidae       | Erebinae       | Catocala    |             | BOLD:AAE9541 | volant            | Roff 1994 | nocturnal     | Kawahara et al. 2017      | aerial-hawking  |
| Lepidoptera | Erebidae       | Arctiinae      |             |             | BOLD:AAC3572 | volant            | Roff 1994 | diurnal       | Kawahara et al. 2017      | gleaning        |
| Lepidoptera | Erebidae       | Hypeninae      |             |             | BOLD:AAC7130 | volant            | Roff 1994 | nocturnal     | Kawahara et al. 2017      | aerial-hawking  |
| Lepidoptera | Erebidae       | Erebinae       | Ercheia     |             | BOLD:AAD8285 | volant            | Roff 1994 | nocturnal     | Kawahara et al. 2017      | aerial-hawking  |
| Lepidoptera | Erebidae       | Erebinae       | Thyas       | juno        | BOLD:AAF1405 | volant            | Roff 1994 | nocturnal     | Kawahara et al. 2017      | aerial-hawking  |
| Lepidoptera | Erebidae       | Erebinae       |             |             | BOLD:ABX5513 | volant            | Roff 1994 | nocturnal     | Kawahara et al. 2017      | aerial-hawking  |
| Lepidoptera | Erebidae       | Arctiinae      |             |             | BOLD:ACE8889 | volant            | Roff 1994 | diurnal       | Kawahara et al. 2017      | gleaning        |
| Lepidoptera | Erebidae       |                |             |             | BOLD:ACT9815 | volant            | Roff 1994 | nocturnal     | Kawahara et al. 2017      | aerial-hawking  |
| Lepidoptera | Erebidae       |                |             |             | BOLD:ADF0678 | volant            | Roff 1994 | nocturnal     | Kawahara et al. 2017      | aerial-hawking  |
| Lepidoptera | Erebidae       | Herminiinae    | Hydrillodes |             | BOLD:ACU0270 | volant            | Roff 1994 | nocturnal     | Kawahara et al. 2017      | aerial-hawking  |
| Lepidoptera |                |                |             |             | BOLD:AAV8834 | volant            | Roff 1994 | undecided     |                           | undecided       |
| Lepidoptera | Erebidae       | Lymantriinae   | Lymantria   | dispar      | BOLD:AAA2052 | volant            | Roff 1994 | diurnal       | Tsukiji 2020 (2021/05/18) | gleaning        |
| Lepidoptera | Erebidae       | Lymantriinae   | Lymantria   | monacha     | BOLD:AAA5537 | volant            | Roff 1994 | nocturnal     | Tsukiji 2020 (2021/05/18) | aerial-hawking  |
| Lepidoptera | Erebidae       | Pangraptinae   | Pangrapta   |             | BOLD:ADF1765 | volant            | Roff 1994 | nocturnal     | Kawahara et al. 2017      | aerial-hawking  |
| Lepidoptera | Gelechiidae    | Gelechiinae    | Gelechia    | cuneatella  | BOLD:AAF5086 | volant            | Roff 1994 | nocturnal     | Kawahara et al. 2017      | aerial-hawking  |

| Order       | Family         | Subfamily      | Genus         | Species        | BIN          | Flight capability | Reference | Diel activity | Reference                 | Mode of capture |
|-------------|----------------|----------------|---------------|----------------|--------------|-------------------|-----------|---------------|---------------------------|-----------------|
| Lepidoptera | Gelechiidae    | Gelechiinae    | Psoricoptera  | gibbosella     | BOLD:AAD0608 | volant            | Roff 1994 | nocturnal     | Kawahara et al. 2017      | aerial-hawking  |
| Lepidoptera | Gelechiidae    |                |               |                | BOLD:ABA1140 | volant            | Roff 1994 | nocturnal     | Kawahara et al. 2017      | aerial-hawking  |
| Lepidoptera | Geometridae    | Ennominae      |               |                | BOLD:ACG8719 | volant            | Roff 1994 | nocturnal     | Capinera 2008             | aerial-hawking  |
| Lepidoptera | Geometridae    | Ennominae      | Cleora        | insolita       | BOLD:ACJ3813 | volant            | Roff 1994 | nocturnal     | Capinera 2008             | aerial-hawking  |
| Lepidoptera | Geometridae    | Ennominae      |               |                | BOLD:AAC6655 | volant            | Roff 1994 | nocturnal     | Capinera 2008             | aerial-hawking  |
| Lepidoptera | Geometridae    | Ennominae      | Deileptenia   | ribeata        | BOLD:AAC3800 | volant            | Roff 1994 | nocturnal     | Capinera 2008             | aerial-hawking  |
| Lepidoptera | Geometridae    | Ennominae      | Ectropis      |                | BOLD:AAB5227 | volant            | Roff 1994 | nocturnal     | Capinera 2008             | aerial-hawking  |
| Lepidoptera | Geometridae    | Ennominae      | Ectropis      | crepuscularia  | BOLD:AAA2076 | volant            | Roff 1994 | nocturnal     | Capinera 2008             | aerial-hawking  |
| Lepidoptera | Geometridae    | Ennominae      | Endropiodes   |                | BOLD:AAF7479 | volant            | Roff 1994 | nocturnal     | Capinera 2008             | aerial-hawking  |
| Lepidoptera | Geometridae    | Larentiinae    | Gandaritis    | fixseni        | BOLD:AAZ1335 | volant            | Roff 1994 | nocturnal     | Capinera 2008             | aerial-hawking  |
| Lepidoptera | Geometridae    | Larentiinae    | Gandaritis    |                | BOLD:AAB5983 | volant            | Roff 1994 | nocturnal     | Capinera 2008             | aerial-hawking  |
| Lepidoptera | Geometridae    | Geometrinae    | Geometra      |                | BOLD:AAB2011 | volant            | Roff 1994 | nocturnal     | Capinera 2008             | aerial-hawking  |
| Lepidoptera | Geometridae    | Ennominae      | Protoaboarmia |                | BOLD:AAA2077 | volant            | Roff 1994 | nocturnal     | Capinera 2008             | aerial-hawking  |
| Lepidoptera | Geometridae    | Larentiinae    | Eupithecia    |                | BOLD:AAA2083 | volant            | Roff 1994 | nocturnal     | Capinera 2008             | aerial-hawking  |
| Lepidoptera | Geometridae    | Sterrhinae     | Cyclophora    |                | BOLD:AAD6021 | volant            | Roff 1994 | nocturnal     | Capinera 2008             | aerial-hawking  |
| Lepidoptera | Geometridae    | Geometrinae    |               |                | BOLD:AAE5087 | volant            | Roff 1994 | nocturnal     | Capinera 2008             | aerial-hawking  |
| Lepidoptera | Geometridae    | Ennominae      |               |                | BOLD:AAE6522 | volant            | Roff 1994 | nocturnal     | Capinera 2008             | aerial-hawking  |
| Lepidoptera | Geometridae    | Ennominae      | Menophra      | senilis        | BOLD:AAF3823 | volant            | Roff 1994 | nocturnal     | Capinera 2008             | aerial-hawking  |
| Lepidoptera | Geometridae    | Ennominae      |               |                | BOLD:AAL8521 | volant            | Roff 1994 | nocturnal     | Capinera 2008             | aerial-hawking  |
| Lepidoptera | Geometridae    | Ennominae      |               |                | BOLD:AAP9222 | volant            | Roff 1994 | nocturnal     | Capinera 2008             | aerial-hawking  |
| Lepidoptera | Geometridae    |                |               |                | BOLD:AAZ1901 | volant            | Roff 1994 | nocturnal     | Capinera 2008             | aerial-hawking  |
| Lepidoptera | Geometridae    | Ennominae      |               |                | BOLD:ABU6285 | volant            | Roff 1994 | nocturnal     | Capinera 2008             | aerial-hawking  |
| Lepidoptera | Geometridae    | Geometrinae    | Jodis         | putata         | BOLD:ABZ4040 | volant            | Roff 1994 | nocturnal     | Capinera 2008             | aerial-hawking  |
| Lepidoptera | Geometridae    | Larentiinae    |               |                | BOLD:ACB9627 | volant            | Roff 1994 | nocturnal     | Capinera 2008             | aerial-hawking  |
| Lepidoptera | Geometridae    |                |               |                | BOLD:ADF1852 | volant            | Roff 1994 | nocturnal     | Capinera 2008             | aerial-hawking  |
| Lepidoptera | Geometridae    | Sterrhinae     | Scopula       |                | LNAUS1341-13 | volant            | Roff 1994 | nocturnal     | Capinera 2008             | aerial-hawking  |
| Lepidoptera | Geometridae    | Ennominae      | Hypomecis     | punctinalis    | BOLD:ACA2461 | volant            | Roff 1994 | nocturnal     | Capinera 2008             | aerial-hawking  |
| Lepidoptera | Geometridae    | Ennominae      |               |                | BOLD:ACS9064 | volant            | Roff 1994 | nocturnal     | Capinera 2008             | aerial-hawking  |
| Lepidoptera | Geometridae    | Ennominae      |               |                | BOLD:AAB6560 | volant            | Roff 1994 | nocturnal     | Capinera 2008             | aerial-hawking  |
| Lepidoptera | Geometridae    | Ennominae      | Ourapteryx    | maculicaudaria | BOLD:AAW9443 | volant            | Roff 1994 | nocturnal     | Capinera 2008             | aerial-hawking  |
| Lepidoptera | Geometridae    | Ennominae      |               |                | BOLD:AAA2521 | volant            | Roff 1994 | nocturnal     | Capinera 2008             | aerial-hawking  |
| Lepidoptera | Geometridae    | Ennominae      | Phthonosema   | tendinosaria   | BOLD:AAF6489 | volant            | Roff 1994 | nocturnal     | Capinera 2008             | aerial-hawking  |
| Lepidoptera | Gracillariidae | Gracillariinae | Caloptilia    | cf. heringi    | BOLD:ADK1669 | volant            | Roff 1994 | nocturnal     | Tsukiji 2020 (2021/05/18) | aerial-hawking  |
| Lepidoptera | Gracillariidae | Gracillariinae | Caloptilia    | hidakensis     | BOLD:AAK1674 | volant            | Roff 1994 | nocturnal     | Tsukiji 2020 (2021/05/18) | aerial-hawking  |
| Lepidoptera | Gracillariidae | Gracillariinae | Caloptilia    |                | BOLD:ACL6329 | volant            | Roff 1994 | nocturnal     | Tsukiji 2020 (2021/05/18) | aerial-hawking  |
| Lepidoptera | Gracillariidae | Gracillariinae |               |                | BOLD:ADK2510 | volant            | Roff 1994 | diurnal       | Capinera 2008             | gleaning        |
| Lepidoptera | Hepialidae     | Hepialinae     |               |                | BOLD:AAO2948 | volant            | Roff 1994 | nocturnal     | Capinera 2008             | aerial-hawking  |
| Lepidoptera | Hepialidae     | Hepialinae     |               |                | BOLD:ACN8703 | volant            | Roff 1994 | nocturnal     | Capinera 2008             | aerial-hawking  |
| Lepidoptera | Hesperiidae    | Coeliadinae    | Burara        | aquilina       | BOLD:ACD6545 | volant            | Roff 1994 | diurnal       | Capinera 2008             | gleaning        |
| Lepidoptera | Hesperiidae    | Hesperiinae    |               |                | LIMBC545-11  | volant            | Roff 1994 | diurnal       | Capinera 2008             | gleaning        |
| Lepidoptera | Hesperiidae    | Hesperiinae    | Thoressa      | varia          | BOLD:ADK0840 | volant            | Roff 1994 | diurnal       | Capinera 2008             | gleaning        |
| Lepidoptera | Lasiocampidae  | Lasiocampinae  | Euthrix       | potatoria      | BOLD:AAC1584 | volant            | Roff 1994 | nocturnal     | Capinera 2008             | aerial-hawking  |
| Lepidoptera | Lecithoceridae |                |               |                | BOLD:AAD6680 | volant            | Roff 1994 | nocturnal     | Kawahara et al. 2017      | aerial-hawking  |

| Order       | Family       | Subfamily      | Genus        | Species     | BIN          | Flight capability | Reference | Diel activity | Reference                 | Mode of capture |
|-------------|--------------|----------------|--------------|-------------|--------------|-------------------|-----------|---------------|---------------------------|-----------------|
| Lepidoptera | Limacodidae  | Limacodinae    |              |             | BOLD:ACE6221 | volant            | Roff 1994 | nocturnal     | Capinera 2008             | aerial-hawking  |
| Lepidoptera | Limacodidae  | Limacodinae    |              |             | BOLD:AAA9203 | volant            | Roff 1994 | nocturnal     | Capinera 2008             | aerial-hawking  |
| Lepidoptera | Limacodidae  |                |              |             | BOLD:ACC2517 | volant            | Roff 1994 | nocturnal     | Capinera 2008             | aerial-hawking  |
| Lepidoptera | Limacodidae  | Limacodinae    | Parasa       |             | BOLD:AAM0823 | volant            | Roff 1994 | nocturnal     | Capinera 2008             | aerial-hawking  |
| Lepidoptera | Limacodidae  | Limacodinae    | Phrixolepia  |             | BOLD:AAV5028 | volant            | Roff 1994 | nocturnal     | Capinera 2008             | aerial-hawking  |
| Lepidoptera | Lycaenidae   | Theclinae      | Rapala       |             | BOLD:AAL1375 | volant            | Roff 1994 | diurnal       | Tsukiji 2020 (2021/05/18) | gleaning        |
| Lepidoptera | Noctuidae    | Acronictinae   | Acronicta    |             | BOLD:ADK0044 | volant            | Roff 1994 | nocturnal     | Capinera 2008             | aerial-hawking  |
| Lepidoptera | Noctuidae    | Pantheinae     | Anacronicta  |             | BOLD:AAK1458 | volant            | Roff 1994 | nocturnal     | Capinera 2008             | aerial-hawking  |
| Lepidoptera | Noctuidae    | Noctuinae      | Apamea       | helva       | BOLD:AAC5412 | volant            | Roff 1994 | nocturnal     | Capinera 2008             | aerial-hawking  |
| Lepidoptera | Noctuidae    | Noctuinae      | Athetis      |             | BOLD:AAV0425 | volant            | Roff 1994 | nocturnal     | Capinera 2008             | aerial-hawking  |
| Lepidoptera | Noctuidae    | Acronictinae   | Belciades    | niveola     | BOLD:ACU0724 | volant            | Roff 1994 | nocturnal     | Capinera 2008             | aerial-hawking  |
| Lepidoptera | Noctuidae    | Amphipyriinae  | Brachionycha | nubeculosa  | BOLD:AAE0860 | volant            | Roff 1994 | nocturnal     | Capinera 2008             | aerial-hawking  |
| Lepidoptera |              |                |              |             | BOLD:ADF8757 | volant            | Roff 1994 | undecided     |                           | undecided       |
| Lepidoptera | Noctuidae    |                |              |             | BOLD:ACT9151 | volant            | Roff 1994 | nocturnal     | Capinera 2008             | aerial-hawking  |
| Lepidoptera | Noctuidae    | Noctuinae      |              |             | BOLD:ACJ1078 | volant            | Roff 1994 | nocturnal     | Capinera 2008             | aerial-hawking  |
| Lepidoptera | Noctuidae    | Oncocnemidinae |              |             | BOLD:AAE4319 | volant            | Roff 1994 | nocturnal     | Capinera 2008             | aerial-hawking  |
| Lepidoptera | Noctuidae    | Plusiinae      |              |             | BOLD:AAE7504 | volant            | Roff 1994 | nocturnal     | Capinera 2008             | aerial-hawking  |
| Lepidoptera | Noctuidae    | Amphipyriinae  |              |             | BOLD:AAW4866 | volant            | Roff 1994 | nocturnal     | Capinera 2008             | aerial-hawking  |
| Lepidoptera | Noctuidae    | Noctuinae      | Leucania     |             | BOLD:AAJ2503 | volant            | Roff 1994 | nocturnal     | Capinera 2008             | aerial-hawking  |
| Lepidoptera | Noctuidae    | Noctuinae      | Lithophane   | socia       | BOLD:AAE6607 | volant            | Roff 1994 | nocturnal     | Capinera 2008             | aerial-hawking  |
| Lepidoptera | Noctuidae    | Noctuinae      | Spodoptera   | exigua      | BOLD:AAA6644 | volant            | Roff 1994 | nocturnal     | Capinera 2008             | aerial-hawking  |
| Lepidoptera | Noctuidae    | Noctuinae      | Spodoptera   | cilium      | BOLD:AAC8279 | volant            | Roff 1994 | nocturnal     | Capinera 2008             | aerial-hawking  |
| Lepidoptera | Noctuidae    | Amphipyriinae  |              |             | BOLD:AAH5319 | volant            | Roff 1994 | nocturnal     | Capinera 2008             | aerial-hawking  |
| Lepidoptera |              |                |              |             | BOLD:ADG3545 | volant            | Roff 1994 | undecided     |                           | undecided       |
| Lepidoptera |              |                |              |             | BOLD:AAB6211 | volant            | Roff 1994 | undecided     |                           | undecided       |
| Lepidoptera | Noctuidae    | Noctuinae      |              |             | BOLD:AAB6980 | volant            | Roff 1994 | nocturnal     | Capinera 2008             | aerial-hawking  |
| Lepidoptera | Noctuidae    | Noctuinae      | Xylena       |             | BOLD:AAE4735 | volant            | Roff 1994 | nocturnal     | Capinera 2008             | aerial-hawking  |
| Lepidoptera | Nolidae      | Chloephorinae  | Nycteola     |             | BOLD:AAE2641 | volant            | Roff 1994 | nocturnal     | Tsukiji 2020 (2021/05/18) | aerial-hawking  |
| Lepidoptera | Nolidae      | Nolinae        | Nola         | confusalis  | BOLD:AAB5563 | volant            | Roff 1994 | nocturnal     | Tsukiji 2020 (2021/05/18) | aerial-hawking  |
| Lepidoptera | Nolidae      | Nolinae        |              |             | BOLD:AAL7275 | volant            | Roff 1994 | nocturnal     | Kawahara et al. 2017      | aerial-hawking  |
| Lepidoptera | Nolidae      | Chloephorinae  | Pseudoips    | prasinana   | BOLD:AAB8807 | volant            | Roff 1994 | nocturnal     | Tsukiji 2020 (2021/05/18) | aerial-hawking  |
| Lepidoptera | Notodontidae |                |              |             | BOLD:AAM3801 | volant            | Roff 1994 | nocturnal     | Capinera 2008             | aerial-hawking  |
| Lepidoptera | Notodontidae | Notodontinae   |              |             | BOLD:AAL6465 | volant            | Roff 1994 | nocturnal     | Capinera 2008             | aerial-hawking  |
| Lepidoptera | Notodontidae | Heterocampinae |              |             | BOLD:AAM4825 | volant            | Roff 1994 | nocturnal     | Capinera 2008             | aerial-hawking  |
| Lepidoptera | Notodontidae | Notodontinae   | Notodonta    |             | BOLD:AAC1146 | volant            | Roff 1994 | nocturnal     | Capinera 2008             | aerial-hawking  |
| Lepidoptera | Notodontidae | Notodontinae   | Shaka        |             | BOLD:ACJ1076 | volant            | Roff 1994 | nocturnal     | Capinera 2008             | aerial-hawking  |
| Lepidoptera | Notodontidae | Heterocampinae | Stauropus    | fagi        | BOLD:AAD0646 | volant            | Roff 1994 | nocturnal     | Capinera 2008             | aerial-hawking  |
| Lepidoptera | Nymphalidae  | Heliconiinae   | Boloria      |             | BOLD:AAB9155 | volant            | Roff 1994 | diurnal       | Kawahara et al. 2017      | gleaning        |
| Lepidoptera | Oecophoridae | Oecophorinae   |              |             | BOLD:AAF9734 | volant            | Roff 1994 | nocturnal     | Capinera 2008             | aerial-hawking  |
| Lepidoptera | Papilionidae | Papilioninae   | Papilio      |             | BOLD:AAI5285 | volant            | Roff 1994 | diurnal       | Capinera 2008             | gleaning        |
| Lepidoptera | Pyrilidae    | Pyrilinae      | Endotricha   | olivacealis | BOLD:ACI9403 | volant            | Roff 1994 | nocturnal     | Tsukiji 2020 (2021/05/18) | aerial-hawking  |
| Lepidoptera | Saturniidae  |                |              |             | BOLD:AAA5428 | volant            | Roff 1994 | nocturnal     | Capinera 2008             | aerial-hawking  |
| Lepidoptera | Saturniidae  | Saturniinae    | Saturnia     |             | BOLD:AAB9581 | volant            | Roff 1994 | nocturnal     | Capinera 2008             | aerial-hawking  |



| Order       | Family         | Subfamily         | Genus         | Species      | BIN          | Flight capability | Reference | Diel activity | Reference                 | Mode of capture |
|-------------|----------------|-------------------|---------------|--------------|--------------|-------------------|-----------|---------------|---------------------------|-----------------|
| Lepidoptera | Saturniidae    | Saturniinae       | Saturnia      | jonasii      | BOLD:AAD1452 | volant            | Roff 1994 | nocturnal     | Capinera 2008             | aerial-hawking  |
| Lepidoptera | Sphingidae     | Smerinthinae      | Callambulyx   |              | BOLD:ABY4871 | volant            | Roff 1994 | nocturnal     | Capinera 2008             | aerial-hawking  |
| Lepidoptera | Sphingidae     | Macroglossinae    |               |              | BOLD:AAB0931 | volant            | Roff 1994 | nocturnal     | Capinera 2008             | aerial-hawking  |
| Lepidoptera | Sphingidae     | Sphinginae        | Sphinx        | ligustri     | BOLD:AAB6107 | volant            | Roff 1994 | nocturnal     | Capinera 2008             | aerial-hawking  |
| Lepidoptera | Sphingidae     | Sphinginae        | Sphinx        |              | BOLD:ACF5246 | volant            | Roff 1994 | nocturnal     | Capinera 2008             | aerial-hawking  |
| Lepidoptera | Stathmopodidae | NA                | Stathmopoda   | pedella      | BOLD:AAD4282 | volant            | Roff 1994 | diurnal       | Kawahara et al. 2017      | gleaning        |
| Lepidoptera | Tineidae       | Scardiinae        | Morophaga     | bucephala    | BOLD:AAG8510 | volant            | Roff 1994 | nocturnal     | Capinera 2008             | aerial-hawking  |
| Lepidoptera | Tortricidae    | Tortricinae       |               |              | BOLD:AAC3136 | volant            | Roff 1994 | nocturnal     | Kawahara et al. 2017      | aerial-hawking  |
| Lepidoptera | Tortricidae    | Tortricinae       | Archips       | betulana     | BOLD:ACM3437 | volant            | Roff 1994 | nocturnal     | Kawahara et al. 2017      | aerial-hawking  |
| Lepidoptera | Tortricidae    | Tortricinae       | Archips       |              | BOLD:AAB5839 | volant            | Roff 1994 | nocturnal     | Kawahara et al. 2017      | aerial-hawking  |
| Lepidoptera | Tortricidae    | Tortricinae       | Choristoneura | diversana    | BOLD:AAD8048 | volant            | Roff 1994 | nocturnal     | Kawahara et al. 2017      | aerial-hawking  |
| Lepidoptera | Tortricidae    | Tortricinae       |               |              | BOLD:ACT2120 | volant            | Roff 1994 | nocturnal     | Kawahara et al. 2017      | aerial-hawking  |
| Lepidoptera | Tortricidae    | Tortricinae       | Dichelia      |              | ANICU1645-11 | volant            | Roff 1994 | nocturnal     | Kawahara et al. 2017      | aerial-hawking  |
| Lepidoptera | Tortricidae    | Tortricinae       | Eana          | incanana     | BOLD:AAD7476 | volant            | Roff 1994 | nocturnal     | Kawahara et al. 2017      | aerial-hawking  |
| Lepidoptera | Tortricidae    | Olethreutinae     | Epinotia      |              | BOLD:AAE1784 | volant            | Roff 1994 | nocturnal     | Kawahara et al. 2017      | aerial-hawking  |
| Lepidoptera | Tortricidae    | Olethreutinae     | Epinotia      | nisella      | BOLD:AAA7530 | volant            | Roff 1994 | nocturnal     | Kawahara et al. 2017      | aerial-hawking  |
| Lepidoptera | Tortricidae    | Olethreutinae     | Eudemis       | porphyrana   | BOLD:AAC6854 | volant            | Roff 1994 | nocturnal     | Kawahara et al. 2017      | aerial-hawking  |
| Lepidoptera | Tortricidae    | Olethreutinae     | Gypsonoma     | dealbana     | BOLD:AAB0380 | volant            | Roff 1994 | nocturnal     | Kawahara et al. 2017      | aerial-hawking  |
| Lepidoptera | Tortricidae    | Olethreutinae     | Lobesia       |              | BOLD:ABV8007 | volant            | Roff 1994 | nocturnal     | Kawahara et al. 2017      | aerial-hawking  |
| Lepidoptera | Tortricidae    | Olethreutinae     |               |              | BOLD:ABZ7645 | volant            | Roff 1994 | nocturnal     | Kawahara et al. 2017      | aerial-hawking  |
| Lepidoptera | Tortricidae    | Olethreutinae     | Olethreutes   |              | BOLD:ACS0054 | volant            | Roff 1994 | nocturnal     | Kawahara et al. 2017      | aerial-hawking  |
| Lepidoptera | Tortricidae    | Tortricinae       | Pandemis      | cinnamomeana | BOLD:AAD0575 | volant            | Roff 1994 | nocturnal     | Kawahara et al. 2017      | aerial-hawking  |
| Lepidoptera | Tortricidae    | Tortricinae       | Pandemis      | corylana     | BOLD:AAC5400 | volant            | Roff 1994 | nocturnal     | Kawahara et al. 2017      | aerial-hawking  |
| Lepidoptera | Tortricidae    | Olethreutinae     | Phiaris       |              | BOLD:AAJ2026 | volant            | Roff 1994 | nocturnal     | Kawahara et al. 2017      | aerial-hawking  |
| Lepidoptera | Tortricidae    | Tortricinae       | Ptycholoma    | lecheanum    | BOLD:AAD3264 | volant            | Roff 1994 | nocturnal     | Kawahara et al. 2017      | aerial-hawking  |
| Lepidoptera | Tortricidae    | Olethreutinae     | Rhopobota     | naevana      | BOLD:AAA9812 | volant            | Roff 1994 | nocturnal     | Kawahara et al. 2017      | aerial-hawking  |
| Lepidoptera | Tortricidae    | Olethreutinae     |               |              | BOLD:AAA0213 | volant            | Roff 1994 | nocturnal     | Kawahara et al. 2017      | aerial-hawking  |
| Lepidoptera | Tortricidae    | Olethreutinae     | Spilionota    | laricana     | BOLD:AAA7739 | volant            | Roff 1994 | nocturnal     | Kawahara et al. 2017      | aerial-hawking  |
| Lepidoptera | Tortricidae    | Tortricinae       | Archips       | crataeganus  | BOLD:AAD6620 | volant            | Roff 1994 | nocturnal     | Kawahara et al. 2017      | aerial-hawking  |
| Lepidoptera |                |                   |               |              | BOLD:AAH4639 | volant            | Roff 1994 | undecided     |                           | undecided       |
| Lepidoptera | Tortricidae    | Olethreutinae     | Epinotia      |              | BOLD:AAN7425 | volant            | Roff 1994 | nocturnal     | Kawahara et al. 2017      | aerial-hawking  |
| Lepidoptera | Tortricidae    | Olethreutinae     |               |              | BOLD:AAV9504 | volant            | Roff 1994 | nocturnal     | Kawahara et al. 2017      | aerial-hawking  |
| Lepidoptera | Tortricidae    |                   |               |              | BOLD:ADE9961 | volant            | Roff 1994 | nocturnal     | Kawahara et al. 2017      | aerial-hawking  |
| Lepidoptera | Tortricidae    | Tortricinae       |               |              | BOLD:ACP8754 | volant            | Roff 1994 | nocturnal     | Kawahara et al. 2017      | aerial-hawking  |
| Lepidoptera | Tortricidae    | Olethreutinae     | Zeiraphera    | rufimitrana  | BOLD:AAM3356 | volant            | Roff 1994 | nocturnal     | Kawahara et al. 2017      | aerial-hawking  |
| Lepidoptera | Uraniidae      | Uraniinae         |               |              | BOLD:ACF4699 | volant            | Roff 1994 | nocturnal     | Capinera 2008             | aerial-hawking  |
| Lepidoptera | Yponomeutidae  | Yponomeutinae     |               |              | BOLD:AAE4109 | volant            | Roff 1994 | diurnal       | Kawahara et al. 2017      | gleaning        |
| Lepidoptera | Ypsolophidae   | Ypsolophinae      | Ypsolopha     | vittella     | BOLD:AAD9548 | volant            | Roff 1994 | diurnal       | Kawahara et al. 2017      | gleaning        |
| Lepidoptera |                |                   |               |              | BOLD:AAD3218 | volant            | Roff 1994 | undecided     |                           | undecided       |
| Mecoptera   | Panorpidae     | Panorpiniae       | Panorpa       | pryeri       | BOLD:ACA3726 | volant            |           | diurnal       | Tsukiji 2020 (2021/05/19) | gleaning        |
| Neuroptera  | Hemerobiidae   | Drepanopteryginae | Drepanopteryx |              | BOLD:ACT2374 | volant            | Roff 1990 | undecided     | Kawahara et al. 2017      | undecided       |
| Neuroptera  | Hemerobiidae   | Hemerobiinae      | Hemerobius    |              | BOLD:AAG0897 | volant            | Roff 1990 | nocturnal     | Tsukiji 2020 (2021/05/18) | aerial-hawking  |
| Neuroptera  | Hemerobiidae   | Hemerobiinae      | Hemerobius    |              | BOLD:ABZ0149 | volant            | Roff 1990 | nocturnal     | Tsukiji 2020 (2021/05/18) | aerial-hawking  |

| Order       | Family           | Subfamily        | Genus         | Species           | BIN          | Flight capability | Reference       | Diel activity | Reference                            | Mode of capture |
|-------------|------------------|------------------|---------------|-------------------|--------------|-------------------|-----------------|---------------|--------------------------------------|-----------------|
| Neuroptera  | Hemerobiidae     | Hemerobiinae     | Hemerobius    | fenestratus       | BOLD:AAU3559 | volant            | Roff 1990       | nocturnal     | Tsukiji 2020 (2021/05/18)            | aerial-hawking  |
| Neuroptera  | Hemerobiidae     | Hemerobiinae     | Hemerobius    | simulans          | BOLD:ACM1832 | volant            | Roff 1990       | nocturnal     | Tsukiji 2020 (2021/05/18)            | aerial-hawking  |
| Neuroptera  | Hemerobiidae     | Hemerobiinae     |               |                   | BOLD:ABU9030 | volant            | Roff 1990       | undecided     | Tsukiji 2020 (2021/05/18)            | undecided       |
| Neuroptera  | Osmyidae         |                  |               |                   | INRMA502-12  | volant            | Roff 1990       | undecided     | Tsukiji 2020 (2021/05/18)            | undecided       |
| Plecoptera  | Nemouridae       | Amphinemurinae   |               |                   | BOLD:AAL6222 | volant            | Roff 1994       | nocturnal     | Yoshimura 2014                       | aerial-hawking  |
| Psocodea    | Psocidae         | Psocinae         | Psococerastis |                   | BOLD:ACC5474 | volant            | Roff 1994       | diurnal       | Tsukiji 2020 (2021/05/19)            | gleaning        |
| Trichoptera | Lepidostomatidae | Lepidostomatinae | Lepidostoma   | elongatum         | RUSST089-12  | volant            | Roff 1990       | nocturnal     | Capinera 2008                        | aerial-hawking  |
| Trichoptera | Psychomyiidae    | Psychomyiinae    | Tinodes       | higashiyamanus    | BOLD:ACD6706 | volant            | Roff 1990       | nocturnal     | Capinera 2008                        | aerial-hawking  |
| Trichoptera | Thremmatidae     | Thremmatinae     | Neophylax     | ussuriensis       | BOLD:AAG9568 | volant            | Roff 1990       | nocturnal     | Capinera 2008                        | aerial-hawking  |
| Opiliones   | Sclerosomatidae  | Leibuninae       | Leibunum      | tohokuense        | NA           | non-volant        |                 |               |                                      | gleaning        |
| Coleoptera  | Elateridae       | Elaterinae       | Agriotes      |                   | NA           | volant            | Roff 1994       | nocturnal     | Capinera 2008                        | aerial-hawking  |
| Coleoptera  | Scarabaeidae     | Rutelinae        | Anomala       |                   | NA           | volant            | Roff 1994       | undecided     | Tsukiji 2020 (2021/05/18)            | undecided       |
| Coleoptera  | Curculionidae    | Curculioninae    | Curculio      |                   | NA           | volant            | Roff 1994       | diurnal       | Tsukiji 2020 (2021/05/18)            | gleaning        |
| Coleoptera  | Cerambycidae     | Lamiinae         | Eutetrappa    |                   | NA           | volant            | Roff 1994       | diurnal       | Tsukiji 2020 (2021/05/18)            | gleaning        |
| Coleoptera  | Tenebrionidae    | Alleculinae      | Hymenalia     |                   | NA           | volant            | Roff 1994       | undecided     | Capinera 2008                        | undecided       |
| Coleoptera  | Scarabaeidae     |                  |               |                   | NA           | volant            | Roff 1994       | diurnal       | Gill et al. 2012                     | gleaning        |
| Coleoptera  | Scarabaeidae     |                  |               |                   | NA           | volant            | Roff 1994       | diurnal       | Gill et al. 2012                     | gleaning        |
| Coleoptera  | Melandryidae     | Malandryinae     | Phloiotrya    | planiuscula       | NA           | volant            | Roff 1994       | nocturnal     | Thomas et al. 2002                   | aerial-hawking  |
| Coleoptera  | Scarabaeidae     |                  |               |                   | NA           | volant            | Roff 1994       | diurnal       | Gill et al. 2012                     | gleaning        |
| Coleoptera  | Cantharidae      | Cantharinae      | Podabrus      |                   | NA           | volant            | Roff 1994       | diurnal       | Tsukiji 2020 (2021/05/18)            | gleaning        |
| Coleoptera  | Chrysomelidae    |                  |               |                   | NA           | volant            | Roff 1994       | diurnal       | Jolivet&Pierre 1981                  | gleaning        |
| Dermaptera  | Forficulidae     | Anechurinae      | Anechura      | harmandi          | NA           | undecided         | Roff 1994       | diurnal       | Novella-Fernandez et al. 2020        | gleaning        |
| Dermaptera  | Forficulidae     | Forficulinae     | Forficula     | mikado            | NA           | undecided         | Roff 1994       | diurnal       | Novella-Fernandez et al. 2020        | gleaning        |
| Diptera     | Mycetophilidae   | Gnoristinae      | Boletina      |                   | NA           | volant            | Roff 1990, 1994 | nocturnal     | Mikkola 1972                         | aerial-hawking  |
| Diptera     | Tachinidae       | Exoristinae      | Botria        | japonica          | NA           | volant            | Roff 1990, 1994 | diurnal       | Novella-Fernandez et al. 2020        | gleaning        |
| Diptera     | Sciaridae        | NA               | Chaetosciara  |                   | NA           | volant            | Roff 1990, 1994 | nocturnal     | Novella-Fernandez et al. 2020        | aerial-hawking  |
| Diptera     | Calliphoridae    | Chrysomyinae     | Chrysomya     |                   | NA           | volant            | Roff 1990, 1994 | nocturnal     | Novella-Fernandez et al. 2020        | gleaning        |
| Diptera     | Empidoidea       |                  |               |                   | NA           | volant            | Roff 1990, 1994 | undecided     |                                      | undecided       |
| Diptera     | Culicidae        | Culicinae        | Culex         |                   | NA           | volant            | Roff 1990, 1994 | nocturnal     | Mikkola 1972                         | aerial-hawking  |
| Diptera     | Culicidae        | Culicinae        | Culex         | tritaeniorhynchus | NA           | volant            | Roff 1990, 1994 | nocturnal     | Mikkola 1972                         | aerial-hawking  |
| Diptera     | Limoniidae       | Limoniinae       | Dicranomyia   |                   | NA           | volant            | Roff 1990, 1994 | nocturnal     | Novella-Fernandez et al. 2020        | aerial-hawking  |
| Diptera     | Limoniidae       | Limoniinae       | Dicranomyia   |                   | NA           | volant            | Roff 1990, 1994 | nocturnal     | Novella-Fernandez et al. 2020        | aerial-hawking  |
| Diptera     | Limoniidae       | Limoniinae       | Dicranomyia   |                   | NA           | volant            | Roff 1990, 1994 | nocturnal     | Novella-Fernandez et al. 2020        | aerial-hawking  |
| Diptera     | Limoniidae       | Limoniinae       | Dicranomyia   |                   | NA           | volant            | Roff 1990, 1994 | nocturnal     | Novella-Fernandez et al. 2020        | aerial-hawking  |
| Diptera     | Tachinidae       | Exoristinae      | Eumea         | linearicornis     | NA           | volant            | Roff 1990, 1994 | diurnal       | Novella-Fernandez et al. 2020        | gleaning        |
| Diptera     | Mycetophilidae   | Mycetophilinae   | Exechia       |                   | NA           | volant            | Roff 1990, 1994 | nocturnal     | Mikkola 1972                         | aerial-hawking  |
| Diptera     | Mycetophilidae   | Mycetophilinae   | Exechia       |                   | NA           | volant            | Roff 1990, 1994 | nocturnal     | Mikkola 1972                         | aerial-hawking  |
| Diptera     | Tachinidae       | Exoristinae      | Gonia         | chinensis         | NA           | volant            | Roff 1990, 1994 | diurnal       | Tsukiji 2020 (2021/05/19)            | gleaning        |
| Diptera     | Limoniidae       |                  |               |                   | NA           | volant            | Roff 1990, 1994 | nocturnal     | Novella-Fernandez et al. 2020        | aerial-hawking  |
| Diptera     | Chironomidae     | Chironominae     | Micropsectra  |                   | NA           | volant            | Roff 1990, 1994 | nocturnal     | Scudder & Cannings 2006 (2021/05/19) | aerial-hawking  |
| Diptera     | Chironomidae     | Chironominae     | Micropsectra  |                   | NA           | volant            | Roff 1990, 1994 | nocturnal     | Scudder & Cannings 2006 (2021/05/19) | aerial-hawking  |
| Diptera     | Mycetophilidae   | Mycetophilinae   | Mycetophila   |                   | NA           | volant            | Roff 1990, 1994 | nocturnal     | Mikkola 1972                         | aerial-hawking  |
| Diptera     | Mycetophilidae   | Mycetophilinae   | Mycetophila   | fungorum          | NA           | volant            | Roff 1990, 1994 | nocturnal     | Mikkola 1972                         | aerial-hawking  |

| Order         | Family           | Subfamily        | Genus            | Species   | BIN | Flight capability | Reference       | Diel activity | Reference                            | Mode of capture |
|---------------|------------------|------------------|------------------|-----------|-----|-------------------|-----------------|---------------|--------------------------------------|-----------------|
| Diptera       | Mycetophilidae   | Mycomyinae       | Mycomya          |           | NA  | volant            | Roff 1990, 1994 | nocturnal     | Mikkola 1972                         | aerial-hawking  |
| Diptera       |                  |                  |                  |           | NA  | volant            | Roff 1990, 1994 | undecided     |                                      | undecided       |
| Diptera       | Empidoidea       |                  |                  |           | NA  | volant            | Roff 1990, 1994 | undecided     |                                      | undecided       |
| Diptera       | Limoniidae       |                  |                  |           | NA  | volant            | Roff 1990, 1994 | nocturnal     | Novella-Fernandez et al. 2020        | aerial-hawking  |
| Diptera       | Psychodidae      |                  |                  |           | NA  | volant            | Roff 1990, 1994 | nocturnal     | Scudder & Cannings 2006 (2021/05/19) | aerial-hawking  |
| Diptera       | Rhagionidae      |                  |                  |           | NA  | volant            | Roff 1990, 1994 | undecided     |                                      | undecided       |
| Diptera       | Tipulidae        |                  |                  |           | NA  | volant            | Roff 1990, 1994 | nocturnal     | Mikkola 1972                         | aerial-hawking  |
| Diptera       | Culicidae        | Culicinae        | Ochlerotatus     |           | NA  | volant            | Roff 1990, 1994 | nocturnal     | Mikkola 1972                         | aerial-hawking  |
| Diptera       | Pediciidae       | Pediciinae       | Pedicia          |           | NA  | volant            | Roff 1990, 1994 | nocturnal     | Novella-Fernandez et al. 2020        | aerial-hawking  |
| Diptera       | Rhinophoridae    |                  |                  |           | NA  | volant            | Roff 1990, 1994 | diurnal       | Novella-Fernandez et al. 2020        | gleaning        |
| Diptera       | Mycetophilidae   | Mycetophilinae   | Pseudobrachypeza |           | NA  | volant            | Roff 1990, 1994 | nocturnal     | Mikkola 1972                         | aerial-hawking  |
| Diptera       | Phoridae         | Phorinae         | Stichillus       |           | NA  | volant            | Roff 1990, 1994 | diurnal       | Novella-Fernandez et al. 2020        | gleaning        |
| Diptera       | Tachinidae       | Exoristinae      | Suensonomyia     | nudinerva | NA  | volant            | Roff 1990, 1994 | diurnal       | Novella-Fernandez et al. 2020        | gleaning        |
| Diptera       | Mycetophilidae   |                  |                  |           | NA  | volant            | Roff 1990, 1994 | nocturnal     | Mikkola 1972                         | aerial-hawking  |
| Diptera       | Muscidae         | Azeliinae        | Thricops         |           | NA  | volant            | Roff 1990, 1994 | diurnal       | Novella-Fernandez et al. 2020        | gleaning        |
| Diptera       | Tipulidae        | Tipulinae        | Tipula           |           | NA  | volant            | Roff 1990, 1994 | nocturnal     | Mikkola 1972                         | aerial-hawking  |
| Diptera       | Tipulidae        | Tipulinae        | Tipula           |           | NA  | volant            | Roff 1990, 1994 | nocturnal     | Mikkola 1972                         | aerial-hawking  |
| Diptera       | Mycetophilidae   | Mycetophilinae   |                  |           | NA  | volant            | Roff 1990, 1994 | nocturnal     | Mikkola 1972                         | aerial-hawking  |
| Ephemeroptera | Heptageniidae    | Rhithrogeniinae  | Rhithrogena      |           | NA  | volant            | Roff 1994       | nocturnal     | Capinera 2008                        | aerial-hawking  |
| Ephemeroptera | Heptageniidae    | Rhithrogeniinae  | Rhithrogena      |           | NA  | volant            | Roff 1994       | nocturnal     | Capinera 2008                        | aerial-hawking  |
| Hemiptera     | Miridae          | Mirinae          | Adelphocoris     |           | NA  | volant            | Roff 1994       | diurnal       | Capinera 2008                        | gleaning        |
| Hemiptera     | Miridae          | Deraeocorinae    | Alloeotomus      | simplus   | NA  | volant            | Roff 1994       | diurnal       | Capinera 2008                        | gleaning        |
| Hemiptera     | Miridae          | Mirinae          | Arbolygus        | rubripes  | NA  | volant            | Roff 1994       | diurnal       | Capinera 2008                        | gleaning        |
| Hemiptera     | Acanthosomatidae | Acanthosomatinae | Elasmucha        | signoreti | NA  | volant            | Roff 1994       | diurnal       | Tsukiji 2020 (2021/05/19)            | gleaning        |
| Hemiptera     | Miridae          | Mirinae          | Phytocoris       |           | NA  | volant            | Roff 1994       | diurnal       | Capinera 2008                        | gleaning        |
| Hemiptera     | Psyllidae        | Psyllinae        | Psylla           |           | NA  | volant            | Roff 1994       | diurnal       | Tsukiji 2020 (2021/05/19)            | gleaning        |
| Hemiptera     | Psyllidae        | Psyllinae        | Psylla           |           | NA  | volant            | Roff 1994       | diurnal       | Tsukiji 2020 (2021/05/19)            | gleaning        |
| Hemiptera     | Aphididae        | Calaphidinae     | Symydobius       | kabae     | NA  | volant            | Roff 1994       | diurnal       | Tsukiji 2020 (2021/05/19)            | gleaning        |
| Hymenoptera   | Braconidae       | Rogadinae        | Aleiodes         |           | NA  | volant            | Roff 1990       | nocturnal     | Mikkola 1972                         | aerial-hawking  |
| Hymenoptera   | Ichneumonidae    | Campopleginae    | Hyposoter        |           | NA  | volant            | Roff 1990       | nocturnal     | Mikkola 1972                         | aerial-hawking  |
| Hymenoptera   | Braconidae       | Microgastrinae   | Microplitis      |           | NA  | volant            | Roff 1990       | nocturnal     | Mikkola 1972                         | aerial-hawking  |
| Hymenoptera   |                  |                  |                  |           | NA  | volant            | Roff 1990       | undecided     |                                      | undecided       |
| Hymenoptera   | Formicidae       |                  |                  |           | NA  | volant            | Roff 1990       | nocturnal     | Novella-Fernandez et al. 2020        | aerial-hawking  |
| Hymenoptera   | Tenthredinidae   | Nematinae        | Nematinus        | luteus    | NA  | volant            | Roff 1990       | diurnal       | Novella-Fernandez et al. 2020        | gleaning        |
| Lepidoptera   | Geometridae      | Ennominae        | Arichanna        | melanaria | NA  | volant            | Roff 1994       | nocturnal     | Capinera 2008                        | aerial-hawking  |
| Lepidoptera   | Noctuidae        |                  |                  |           | NA  | volant            | Roff 1994       | nocturnal     | Capinera 2008                        | aerial-hawking  |
| Lepidoptera   | Tortricidae      | Tortricinae      |                  |           | NA  | volant            | Roff 1994       | nocturnal     | Kawahara et al. 2017                 | aerial-hawking  |
| Trichoptera   | Limnephilidae    | Dicosmoecinae    | Dicosmoecus      |           | NA  | volant            | Roff 1990       | nocturnal     | Capinera 2008                        | aerial-hawking  |
| Lepidoptera   | Geometridae      | Ennominae        | Ectropis         | obliqua   | NA  | volant            | Roff 1994       | nocturnal     | Capinera 2008                        | aerial-hawking  |
| Lepidoptera   | Tortricidae      | Tortricinae      |                  |           | NA  | volant            | Roff 1994       | nocturnal     | Kawahara et al. 2017                 | aerial-hawking  |
| Lepidoptera   | Geometridae      | Ennominae        | Jankowskia       |           | NA  | volant            | Roff 1994       | nocturnal     | Capinera 2008                        | aerial-hawking  |
| Lepidoptera   | Geometridae      | Larentiinae      | Lobogonodes      | erectaria | NA  | volant            | Roff 1994       | nocturnal     | Capinera 2008                        | aerial-hawking  |
| Lepidoptera   | Erebidae         | Lymantriinae     | Lymantria        |           | NA  | volant            | Roff 1994       | undecided     | Tsukiji 2020 (2021/05/18)            | undecided       |

| Order        | Family           | Subfamily       | Genus            | Species        | BIN | Flight capability | Reference           | Diel activity | Reference                 | Mode of capture |
|--------------|------------------|-----------------|------------------|----------------|-----|-------------------|---------------------|---------------|---------------------------|-----------------|
| Lepidoptera  | Geometridae      | Ennominae       | Myrioblephara    | cilicornaria   | NA  | volant            | Roff 1994           | nocturnal     | Capinera 2008             | aerial-hawking  |
| Lepidoptera  |                  |                 |                  |                | NA  | volant            | Roff 1994           | undecided     |                           | undecided       |
| Lepidoptera  | Noctuidae        | Noctuinae       | Panolis          |                | NA  | volant            | Roff 1994           | nocturnal     | Capinera 2008             | aerial-hawking  |
| Lepidoptera  | Noctuidae        | Hadeninae       | Panolis          |                | NA  | volant            | Roff 1994           | nocturnal     | Capinera 2008             | aerial-hawking  |
| Lepidoptera  | Noctuidae        |                 |                  |                | NA  | volant            | Roff 1994           | nocturnal     | Capinera 2008             | aerial-hawking  |
| Lepidoptera  | Noctuidae        |                 |                  |                | NA  | volant            | Roff 1994           | nocturnal     | Capinera 2008             | aerial-hawking  |
| Lepidoptera  | Thyrididae       | Siculodinae     | Pyrinioides      | aurea          | NA  | volant            | Roff 1994           | diurnal       | Capinera 2008             | gleaning        |
| Lepidoptera  | Saturniidae      | Saturniinae     | Saturnia         |                | NA  | volant            | Roff 1994           | nocturnal     | Capinera 2008             | aerial-hawking  |
| Mecoptera    | Panorpidae       | Panorpiniae     | Panorpa          | takenouchii    | NA  | volant            |                     | diurnal       | Tsukiji 2020 (2021/05/19) | gleaning        |
| Neuroptera   | Chrysopidae      | Chrysopinae     | Apertochrysa     |                | NA  | volant            | Roff 1990           | undecided     | Kawahara et al. 2017      | undecided       |
| Neuroptera   | Chrysopidae      | Chrysopinae     | Chrysoperla      |                | NA  | volant            | Roff 1990           | diurnal       | Tsukiji 2020 (2021/05/18) | gleaning        |
| Neuroptera   | Chrysopidae      | Chrysopinae     | Chrysoperla      |                | NA  | volant            | Roff 1990           | diurnal       | Tsukiji 2020 (2021/05/18) | gleaning        |
| Neuroptera   | Osmylidae        | Osmylinae       | Osmylus          |                | NA  | volant            | Roff 1990           | diurnal       | Tsukiji 2020 (2021/05/18) | gleaning        |
| Neuroptera   | Hemerobiidae     | Hemerobiinae    |                  |                | NA  | volant            | Roff 1990           | undecided     | Tsukiji 2020 (2021/05/18) | undecided       |
| Odonata      | Libellulidae     | Sympetrinae     | Sympetrum        | frequens       | NA  | volant            | Roff 1994           | diurnal       | Capinera 2008             | gleaning        |
| Odonata      | Libellulidae     | Sympetrinae     | Sympetrum        | infuscatum     | NA  | volant            | Roff 1994           | diurnal       | Capinera 2008             | gleaning        |
| Orthoptera   | Rhaphidophoridae | Aemodogryllinae |                  |                | NA  | non-volant        | Leubner et al. 2016 |               |                           | gleaning        |
| Orthoptera   | Trigonidiidae    | Nemobiinae      | Dianemobius      | nigrofasciatus | NA  | non-volant        | Leubner et al. 2016 |               |                           | gleaning        |
| Orthoptera   | Rhaphidophoridae | Aemodogryllinae | Diestrammena     |                | NA  | non-volant        | Leubner et al. 2016 |               |                           | gleaning        |
| Orthoptera   | Rhaphidophoridae |                 |                  |                | NA  | non-volant        | Leubner et al. 2016 |               |                           | gleaning        |
| Orthoptera   | Rhaphidophoridae |                 |                  |                | NA  | non-volant        | Leubner et al. 2016 |               |                           | gleaning        |
| Plecoptera   | Perlidae         | Acroneuriinae   | Calineuria       |                | NA  | volant            | Roff 1994           | nocturnal     | Yoshimura 2014            | aerial-hawking  |
| Plecoptera   | Nemouridae       |                 |                  |                | NA  | volant            | Roff 1994           | nocturnal     | Yoshimura 2014            | aerial-hawking  |
| Psocodea     | Amphipsocidae    | Amphipsocinae   | Amphipsocus      | japonicus      | NA  | volant            | Roff 1994           | diurnal       |                           | gleaning        |
| Psocodea     |                  |                 |                  |                | NA  | volant            | Roff 1994           | diurnal       |                           | gleaning        |
| Psocodea     | Mesopsocidae     | NA              | Mesopsocus       | unipunctatus   | NA  | volant            | Roff 1994           | diurnal       |                           | gleaning        |
| Psocodea     | Psocidae         | Psocinae        | Psococerastis    |                | NA  | volant            | Roff 1994           | diurnal       | Tsukiji 2020 (2021/05/19) | gleaning        |
| Psocodea     | Psocidae         | Psocinae        | Psococerastis    | nubila         | NA  | volant            | Roff 1994           | diurnal       | Tsukiji 2020 (2021/05/19) | gleaning        |
| Psocodea     | Stenopsocidae    | NA              | Stenopsocus      | nigricellus    | NA  | volant            | Roff 1994           | diurnal       | Tsukiji 2020 (2021/05/19) | gleaning        |
| Psocodea     | Psocidae         | Psocinae        | Trichadenotecnum |                | NA  | volant            | Roff 1994           | diurnal       |                           | gleaning        |
| Psocodea     | Psocidae         | Psocinae        | Trichadenotecnum | incognitum     | NA  | volant            | Roff 1994           | diurnal       |                           | gleaning        |
| Psocodea     | Psocidae         | Psocinae        | Trichadenotecnum |                | NA  | volant            | Roff 1994           | diurnal       |                           | gleaning        |
| Thysanoptera | Thripidae        | Thripinae       | Thrips           |                | NA  | volant            | Roff 1990           | nocturnal     | Sites et al. 1992         | aerial-hawking  |
