# Supplementary material for: Dietary analysis reveals differences in the prey use of two sympatric bat species
Source: PubMed Central journal article supplement (PMC8717349; doi:10.1002/ece3.8472), 2021-12-16
Supplement: ECE3-11-18651-s004.pdf [file ECE3-11-18651-s004.pdf]

## Supplementary information S1 for *Dietary analysis reveals differences in the prey use of two sympatric bat species*

Olga Heim<sup>1</sup>, Anna I.E. Puisto<sup>2</sup>, Ilari Sääksjärvi<sup>3</sup>, Dai Fukui<sup>4</sup> and Eero J. Vesterinen<sup>5\*</sup>

<sup>1</sup> Faculty of Life and Medical Sciences, Doshisha University, 610-0321 Kyotanabe, Japan

<sup>2</sup> Centre for Population Health Research, University of Turku, 20014 Turku, Finland

<sup>3</sup> Biodiversity Unit, University of Turku, 20014 Turku, Finland

<sup>4</sup> The University of Tokyo Hokkaido Forest, The University of Tokyo, 079-1563 Furano, Japan

<sup>5</sup> Department of Biology, University of Turku, 20014 Turku, Finland

### Prey list

| in Japan | in Hokkaido | Primer | Class      | Order       | Family                | Subfamily            | Genus                    | Species                 | BIN          | Family                     | Subfamily               | Genus                           | Species               |
|----------|-------------|--------|------------|-------------|-----------------------|----------------------|--------------------------|-------------------------|--------------|----------------------------|-------------------------|---------------------------------|-----------------------|
|          |             | COI    | Arachnida  | Araneae     | Lycosidae             | NA                   | <b>Pardosa</b>           |                         | BOLD:ABA5238 |                            | NA                      | Nadolny et al. 2016             |                       |
|          |             | COI    | Arachnida  | Araneae     | <b>Salticidae</b>     |                      |                          |                         | BOLD:AAV1597 | Ono et al. 2009            |                         |                                 |                       |
|          |             | COI    | Arachnida  | Araneae     | <b>Salticidae</b>     |                      |                          |                         | GBCH10991-13 | Yaginuma 1972              |                         |                                 |                       |
|          |             | COI    | Arachnida  | Araneae     | <b>Salticidae</b>     |                      |                          |                         | BOLD:ACH5240 | Ono et al. 2009            |                         |                                 |                       |
|          |             | COI    | Collembola | Symphyleona | Bourletiellidae       | NA                   | <b>Deuterosminthurus</b> |                         | BOLD:AAB7915 |                            | NA                      | Yosii 1977                      |                       |
|          |             | COI    | Insecta    | Blattodea   | <b>Ectobiidae</b>     | <b>Ectobiinae</b>    |                          |                         | BOLD:ACI8100 | 小松 et al. 2015; 小松 2019    | Becalloni 2014; 1       |                                 |                       |
|          |             | COI    | Insecta    | Coleoptera  | <b>Carabidae</b>      |                      |                          |                         | BOLD:AAZ4621 | Kaizuka & Iwasa 2015       |                         |                                 |                       |
|          |             | COI    | Insecta    | Coleoptera  | <b>Coccinellidae</b>  |                      |                          |                         | BOLD:ACP4109 | Okuda & Hodek 1994         |                         |                                 |                       |
|          |             | COI    | Insecta    | Coleoptera  | Cantharidae           | Cantharinae          | <b>Podabrus</b>          |                         | BOLD:ACD6222 |                            |                         | Kazantsev 2011                  |                       |
|          |             | COI    | Insecta    | Coleoptera  | Cantharidae           | Cantharinae          | <b>Podabrus</b>          |                         | BOLD:ACD6257 |                            |                         | Kazantsev 2011                  |                       |
|          |             | COI    | Insecta    | Coleoptera  | Carabidae             | <b>Harpalinae</b>    |                          |                         | BOLD:ABX4019 |                            | Kaizuka & Iwasa 2015    |                                 |                       |
|          |             | COI    | Insecta    | Coleoptera  | Carabidae             | Carabinae            | <b>Carabus</b>           |                         | BOLD:ABY6003 |                            |                         | Löbl & Löbl 2017                |                       |
|          |             | COI    | Insecta    | Coleoptera  | Carabidae             | Harpalinae           | <b>Pterostichus</b>      | <b>oblongopunctatus</b> | BOLD:ABY4764 |                            |                         | Kosuda et al. 2016              | Roskov et al. 2019; 2 |
|          |             | COI    | Insecta    | Coleoptera  | Cerambycidae          | Lamiinae             | <b>Monochamus</b>        |                         | BOLD:AAC3388 |                            |                         | Togashi et al. 2010             |                       |
|          |             | COI    | Insecta    | Coleoptera  | Chrysomelidae         | <b>Chrysomelinae</b> |                          |                         | BOLD:AAC0432 |                            | Cho & Świętojańska 2017 |                                 |                       |
|          |             | COI    | Insecta    | Coleoptera  | <b>Cryptophagidae</b> | <b>Atomariinae</b>   | <b>Atomaria</b>          | <b>turgida</b>          | BOLD:AAJ9463 | Otero et al. 2017          | Otero et al. 2017       | Otero et al. 2017               | Lyubarsky 2014        |
|          |             | COI    | Insecta    | Coleoptera  | Curculionidae         | Entiminae            | <b>Polydrusus</b>        |                         | BOLD:ACO8630 |                            |                         | Morimoto et al. 2015            |                       |
|          |             | COI    | Insecta    | Coleoptera  | Hydrophilidae         | Hydrophilinae        | <b>Enochrus</b>          |                         | BOLD:AAF0204 |                            |                         | Minoshima 2019; Jia & Wang 2010 |                       |
|          |             | COI    | Insecta    | Coleoptera  | Nitidulidae           | <b>Nitidulinae</b>   | <b>Cychramus</b>         | <b>variegatus</b>       | BOLD:ABW4745 | Kashizaki & Hisamatsu 2011 | Lee et al. 2017         | Hayashi 1978                    | Hayashi 1978          |
|          |             | COI    | Insecta    | Coleoptera  | Staphylinidae         | <b>Euaesthetinae</b> | <b>Euaesthetus</b>       |                         | BOLD:ACG9244 | Oh & Cho 2015              | Puthz 2010              | Puthz 2010                      |                       |
|          |             | COI    | Insecta    | Diptera     | <b>Anthomyiidae</b>   |                      |                          |                         | BOLD:AAG2490 | Suwa 2018                  |                         |                                 |                       |
|          |             | COI    | Insecta    | Diptera     | Tachinidae            | <b>Exoristinae</b>   |                          |                         | BOLD:AAI6325 |                            | O'Hara et al. 2019      |                                 |                       |
|          |             | COI    | Insecta    | Diptera     | Tipulidae             | Tipulinae            | <b>Tipula</b>            |                         | BOLD:AAN5045 |                            |                         | Men et al. 2019                 |                       |
|          |             | COI    | Insecta    | Diptera     | Tipulidae             | Tipulinae            | <b>Tipula</b>            |                         | BOLD:AAN9029 |                            |                         | Men et al. 2019                 |                       |
|          |             | COI    | Insecta    | Diptera     | Limoniidae            | Chioneinae           | <b>Teucholabis</b>       |                         | BOLD:AAV2508 |                            |                         | Kato 2019                       |                       |
|          |             | COI    | Insecta    | Diptera     | Limoniidae            | <b>Chioneinae</b>    |                          |                         | BOLD:ABA4102 |                            | Kato 2019               |                                 |                       |
|          |             | COI    | Insecta    | Diptera     | <b>Cecidomyiidae</b>  |                      |                          |                         | BOLD:ABV2094 | Abe et al. 2011            |                         |                                 |                       |
|          |             | COI    | Insecta    | Diptera     | <b>Limoniidae</b>     |                      |                          |                         | BOLD:ABX4369 | Savchenko et al. 1992      |                         |                                 |                       |
|          |             | COI    | Insecta    | Diptera     | Limoniidae            | Limoniinae           | <b>Libnotes</b>          |                         | BOLD:ABY2385 |                            |                         | Savchenko et al. 1992           |                       |

| Primer | Class   | Order   | Family         | Subfamily     | Genus          | Species   | BIN          | Family                                   | Subfamily             | Genus                  | Species            |
|--------|---------|---------|----------------|---------------|----------------|-----------|--------------|------------------------------------------|-----------------------|------------------------|--------------------|
| COI    | Insecta | Diptera | Syrphidae      | Eristalinae   |                |           | BOLD:ABY2389 |                                          | Prokhorov et al. 2018 |                        |                    |
| COI    | Insecta | Diptera | Tipulidae      | Tipulinae     | Tipula         |           | BOLD:ABY5691 |                                          |                       | Men et al. 2019        |                    |
| COI    | Insecta | Diptera | Phoridae       |               |                |           | BOLD:ACA3150 | Michailovskaya 1998                      |                       |                        |                    |
| COI    | Insecta | Diptera | Tachinidae     | Tachininae    | Nemoraea       | takanoi   | BOLD:ACA7375 |                                          |                       |                        | O'Hara et al. 2019 |
| COI    | Insecta | Diptera | Chironomidae   | Chironominae  | Glyptotendipes |           | BOLD:ACE3296 |                                          |                       | Yamamoto 1996          |                    |
| COI    | Insecta | Diptera | Tachinidae     |               |                |           | BOLD:ACF0578 | O'Hara et al. 2019                       |                       |                        |                    |
| COI    | Insecta | Diptera | Tipulidae      | Tipulinae     | Tipula         |           | BOLD:ACF0878 |                                          |                       | Men et al. 2019        |                    |
| COI    | Insecta | Diptera | Phoridae       |               |                |           | BOLD:ACF6080 | Michailovskaya 1998                      |                       |                        |                    |
| COI    | Insecta | Diptera | Sphaeroceridae | Limosininae   | Rachispoda     |           | BOLD:ACK2192 |                                          |                       | Hayashi 1986           |                    |
| COI    | Insecta | Diptera | Chironomidae   |               |                |           | BOLD:ACK8680 | Sasa & Suzuki 2000, Yamamoto et al. 2015 |                       |                        |                    |
| COI    | Insecta | Diptera | Sciaridae      |               |                |           | BOLD:ACM6077 | Menzel & Mohrig 2000                     |                       |                        |                    |
| COI    | Insecta | Diptera | Simuliidae     |               |                |           | BOLD:ACM8222 | Adler & Crosskey 2008                    |                       |                        |                    |
| COI    | Insecta | Diptera | Limoniidae     |               |                |           | BOLD:ACN0178 | Savchenko et al. 1992                    |                       |                        |                    |
| COI    | Insecta | Diptera | Limoniidae     |               |                |           | BOLD:ACN0238 | Savchenko et al. 1992                    |                       |                        |                    |
| COI    | Insecta | Diptera | Mycetophilidae |               |                |           | BOLD:ACN0859 | Ratnasingham & Hebert 2007               |                       |                        |                    |
| COI    | Insecta | Diptera | Calliphoridae  |               |                |           | BOLD:ACN1515 | Hori et al. 1990                         |                       |                        |                    |
| COI    | Insecta | Diptera | Psychodidae    |               |                |           | BOLD:ACN3276 | Sanjoba et al. 2011                      |                       |                        |                    |
| COI    | Insecta | Diptera | Drosophilidae  |               |                |           | BOLD:ACN4805 | Toda 1987                                |                       |                        |                    |
| COI    | Insecta | Diptera |                |               |                |           | BOLD:ACN5240 |                                          |                       |                        |                    |
| COI    | Insecta | Diptera | Limoniidae     |               |                |           | BOLD:ACN5325 | Savchenko et al. 1992                    |                       |                        |                    |
| COI    | Insecta | Diptera | Phoridae       |               |                |           | BOLD:ACO0272 | Michailovskaya 1998                      |                       |                        |                    |
| COI    | Insecta | Diptera | Chironomidae   |               |                |           | BOLD:ACO4488 | Sasa & Suzuki 2000, Yamamoto et al. 2015 |                       |                        |                    |
| COI    | Insecta | Diptera |                |               |                |           | BOLD:ACP6542 |                                          |                       |                        |                    |
| COI    | Insecta | Diptera | Chloropidae    |               |                |           | BOLD:ACR0489 | Nartshuk 2017                            |                       |                        |                    |
| COI    | Insecta | Diptera | Muscidae       |               |                |           | BOLD:ACT7328 | Ratnasingham & Hebert 2007               |                       |                        |                    |
| COI    | Insecta | Diptera | Sciaridae      |               |                |           | BOLD:ACU8386 | Menzel & Mohrig 2000                     |                       |                        |                    |
| COI    | Insecta | Diptera | Muscidae       | Phaoniinae    | Helina         |           | BOLD:ACV2533 |                                          |                       | Zhang & Kurahashi 2000 |                    |
| COI    | Insecta | Diptera | Psychodidae    |               |                |           | BOLD:ACW2931 | Sanjoba et al. 2011                      |                       |                        |                    |
| COI    | Insecta | Diptera | Agromyzidae    |               |                |           | BOLD:AAV4874 | Sasakawa 2015                            |                       |                        |                    |
| COI    | Insecta | Diptera | Anthomyiidae   | Anthomyiinae  | Botanophila    |           | BOLD:AAG2502 |                                          |                       | Sevcik & Papp 2004     |                    |
| COI    | Insecta | Diptera | Anthomyiidae   | Anthomyiinae  | Lasiomma       |           | BOLD:ACK1581 |                                          |                       | Suwa 2018              |                    |
| COI    | Insecta | Diptera | Anthomyiidae   | Anthomyiinae  | Delia          | platura   | BOLD:AAG2511 |                                          |                       |                        | Mizukoshi 2000     |
| COI    | Insecta | Diptera | Anthomyiidae   | Anthomyiinae  | Botanophila    | profuga   | BOLD:ACP6334 |                                          |                       |                        | Suwa 1999          |
| COI    | Insecta | Diptera | Bolitophilidae | NA            | Bolitophila    |           | BOLD:AAM9007 |                                          | NA                    | Sevcik & Papp 2004     |                    |
| COI    | Insecta | Diptera | Cecidomyiidae  |               |                |           | BOLD:ACP9491 | Abe et al. 2011                          |                       |                        |                    |
| COI    | Insecta | Diptera | Cecidomyiidae  |               |                |           | BOLD:ACU9836 | Abe et al. 2011                          |                       |                        |                    |
| COI    | Insecta | Diptera | Cecidomyiidae  | Cecidomyiinae | Feltiella      | acarisuga | BOLD:ACD4136 |                                          |                       |                        | Abe et al. 2011    |

| Primer | Class   | Order   | Family          | Subfamily       | Genus               | Species    | BIN          | Family                                   | Subfamily                                | Genus                                           | Species                    |
|--------|---------|---------|-----------------|-----------------|---------------------|------------|--------------|------------------------------------------|------------------------------------------|-------------------------------------------------|----------------------------|
| COI    | Insecta | Diptera | Chamaemyiidae   |                 |                     |            | BOLD:ACC5885 | Nagatomi 1968                            |                                          |                                                 |                            |
| COI    | Insecta | Diptera | Chironomidae    | Diamesinae      | Diamesa             |            | BOLD:AAB5106 |                                          |                                          | Suzuki 1998                                     |                            |
| COI    | Insecta | Diptera | Chironomidae    | Orthoclaadiinae | Heterotrissocladius | marcidus   | BOLD:AAF2163 |                                          | Sasa & Suzuki 2000, Yamamoto et al. 2015 | Yamamoto 2004                                   | Yamamoto 2004              |
| COI    | Insecta | Diptera | Chironomidae    | Orthoclaadiinae | Eukiefferiella      |            | BOLD:AAI5126 |                                          |                                          | Sasa & Suzuki 2000                              |                            |
| COI    | Insecta | Diptera |                 |                 |                     |            | BOLD:ACQ9269 |                                          |                                          |                                                 |                            |
| COI    | Insecta | Diptera | Chironomidae    | Orthoclaadiinae | Cricotopus          | bicinctus  | BOLD:AAT9677 |                                          |                                          |                                                 | Sasa & Suzuki 2001         |
| COI    | Insecta | Diptera | Chironomidae    |                 |                     |            | BOLD:ACB8882 | Sasa & Suzuki 2000, Yamamoto et al. 2015 |                                          |                                                 |                            |
| COI    | Insecta | Diptera | Chironomidae    |                 |                     |            | BOLD:ACF6427 | Sasa & Suzuki 2000, Yamamoto et al. 2015 |                                          |                                                 |                            |
| COI    | Insecta | Diptera | Chironomidae    | Diamesinae      |                     |            | BOLD:ACK5496 |                                          | Ratnasingham & Hebert 2007               |                                                 |                            |
| COI    | Insecta | Diptera | Chloropidae     | Oscinellinae    |                     |            | BOLD:AAN5657 |                                          | Nartshuk 2017                            |                                                 |                            |
| COI    | Insecta | Diptera | Chloropidae     |                 |                     |            | BOLD:ADC9928 | Nartshuk 2017                            |                                          |                                                 |                            |
| COI    | Insecta | Diptera | Culicidae       | Culicinae       |                     |            | BOLD:AAF2904 |                                          |                                          | Tanaka 1999                                     |                            |
| COI    | Insecta | Diptera | Culicidae       | Culicinae       | Culex               | orientalis | BOLD:ACB9306 |                                          |                                          |                                                 | Ratnasingham & Hebert 2007 |
| COI    | Insecta | Diptera | Culicidae       | Culicinae       | Culex               |            | BOLD:AAA4751 |                                          |                                          | Ratnasingham & Hebert 2007; Fonseca et al. 2009 |                            |
| COI    | Insecta | Diptera | Cylindrotomidae | Cylindrotominae | Cylindrotoma        |            | BOLD:AAD0770 |                                          |                                          | Ratnasingham & Hebert 2007                      |                            |
| COI    | Insecta | Diptera | Drosophilidae   | Drosophilinae   | Drosophila          |            | BOLD:AAY0127 |                                          |                                          | Ratnasingham & Hebert 2007                      |                            |
| COI    | Insecta | Diptera | Drosophilidae   | Drosophilinae   | Drosophila          |            | BOLD:ADH1432 |                                          |                                          | Ratnasingham & Hebert 2007                      |                            |
| COI    | Insecta | Diptera | Drosophilidae   | Steganinae      | Leucophenga         |            | BOLD:ACA1411 |                                          |                                          | Chen & Aotsuka 2003                             |                            |
| COI    | Insecta | Diptera | Ephydriidae     |                 |                     |            | BOLD:ACS0447 | Kang & Suh 2017                          |                                          |                                                 |                            |
| COI    | Insecta | Diptera | Hybotidae       | Tachydromiinae  | Chersodromia        |            | BOLD:ACJ9160 |                                          |                                          | Maeda 2011                                      |                            |
| COI    | Insecta | Diptera | Keroplastidae   |                 |                     |            | BOLD:AAG4943 | Polevoi & Barkalov 2017                  |                                          |                                                 |                            |
| COI    | Insecta | Diptera | Limoniidae      | Limoniinae      | Antocha             | bifida     | BOLD:AAW5955 |                                          |                                          |                                                 | Savchenko et al. 1992      |
| COI    | Insecta | Diptera | Limoniidae      | Limoniinae      | Dicranomyia         | frontalis  | BOLD:ABA5203 |                                          |                                          |                                                 | Savchenko et al. 1992      |
| COI    | Insecta | Diptera | Limoniidae      | Limoniinae      | Dicranomyia         |            | BOLD:ABW0212 |                                          |                                          | Savchenko et al. 1992                           |                            |
| COI    | Insecta | Diptera | Limoniidae      |                 |                     |            | BOLD:ABV4791 | Savchenko et al. 1992                    |                                          |                                                 |                            |
| COI    | Insecta | Diptera | Limoniidae      |                 |                     |            | BOLD:ACS9407 | Savchenko et al. 1992                    |                                          |                                                 |                            |
| COI    | Insecta | Diptera | Limoniidae      | Limoniinae      | Discobola           |            | BOLD:ABW4922 |                                          |                                          | Savchenko et al. 1992                           |                            |
| COI    | Insecta | Diptera | Limoniidae      | Limoniinae      | Libnotes            |            | BOLD:ABW9478 |                                          |                                          | Savchenko et al. 1992                           |                            |
| COI    | Insecta | Diptera | Limoniidae      | Limoniinae      | Dicranomyia         |            | BOLD:AAO3939 |                                          |                                          | Savchenko et al. 1992                           |                            |
| COI    | Insecta | Diptera | Limoniidae      | Limoniinae      | Dicranomyia         |            | FINTI487-12  |                                          |                                          | Savchenko et al. 1992                           |                            |
| COI    | Insecta | Diptera | Limoniidae      | Limoniinae      | Metalimnobia        |            | BOLD:ABU9381 |                                          |                                          | Savchenko et al. 1992                           |                            |
| COI    | Insecta | Diptera | Limoniidae      | Limoniinae      | Metalimnobia        |            | BOLD:AAX5093 |                                          |                                          | Savchenko et al. 1992                           |                            |
| COI    | Insecta | Diptera | Limoniidae      | Limoniinae      | Rhipidia            | maculata   | BOLD:ACB7799 |                                          |                                          |                                                 | Savchenko et al. 1992      |
| COI    | Insecta | Diptera | Lonchopteridae  | NA              | Lonchoptera         |            | BOLD:ACB6694 |                                          | NA                                       | Wagner et al. 2008                              |                            |
| COI    | Insecta | Diptera | Muscidae        |                 |                     |            | BOLD:ACD2056 | Vikhrev 2009; Ratnasingham & Hebert 2007 |                                          |                                                 |                            |

| Primer | Class   | Order   | Family         | Subfamily      | Genus        | Species     | BIN          | Family                                                            | Subfamily                  | Genus                          | Species                  |
|--------|---------|---------|----------------|----------------|--------------|-------------|--------------|-------------------------------------------------------------------|----------------------------|--------------------------------|--------------------------|
| COI    | Insecta | Diptera | Muscidae       |                |              |             | BOLD:AAG1765 | Vikhrev 2009; Ratnasingham & Hebert 2007                          |                            |                                |                          |
| COI    | Insecta | Diptera | Muscidae       | Phaoniinae     | Helina       | obscurata   | BOLD:AAE6931 |                                                                   |                            | Zhang & Kurahashi 2000         | Sorokina et al. 2018     |
| COI    | Insecta | Diptera | Muscidae       | Azeliinae      | Muscina      | pascuorum   | BOLD:AAG1714 |                                                                   |                            | Vikhrev 2009                   | Sawabe et al. 2006       |
| COI    | Insecta | Diptera | Muscidae       |                |              |             | BOLD:ACR5608 | Vikhrev 2009                                                      |                            |                                |                          |
| COI    | Insecta | Diptera | Muscidae       |                |              |             | BOLD:AAX1493 | Ratnasingham & Hebert 2007;<br>Zhang & Kurahashi 2000; Iwasa 2007 |                            |                                |                          |
| COI    | Insecta | Diptera | Muscidae       | Azeliinae      | Hydrotaea    | armipes     | BOLD:AAG6908 |                                                                   |                            | Vikhrev 2015                   | Mihalyi 1976             |
| COI    | Insecta | Diptera | Muscidae       | Phaoniinae     | Phaonia      |             | BOLD:AAG1772 |                                                                   |                            | Вихрев & Ерофеева 2018         |                          |
| COI    | Insecta | Diptera | Muscidae       | Phaoniinae     | Phaonia      |             | BOLD:AAP8142 |                                                                   |                            | Вихрев & Ерофеева 2018         |                          |
| COI    | Insecta | Diptera | Muscidae       | Azeliinae      | Hydrotaea    | glabricula  | BOLD:ADK1195 |                                                                   |                            | Vikhrev 2015                   | Vikhrev 2015             |
| COI    | Insecta | Diptera | Muscidae       | Azeliinae      | Potamia      | littoralis  | BOLD:ACQ0523 |                                                                   |                            |                                | Iwasa et al. 1995        |
| COI    | Insecta | Diptera | Muscidae       | Azeliinae      | Thricops     | diaphanus   | BOLD:AAG1710 |                                                                   |                            |                                | Beppu 2004               |
| COI    | Insecta | Diptera | Mycetophilidae | Mycetophilinae | Platurocypta |             | BOLD:ACC5656 |                                                                   | Ratnasingham & Hebert 2007 | 杉浦 et al. 2003                 |                          |
| COI    | Insecta | Diptera | Pediciidae     | Uliinae        | Ula          |             | BOLD:AAV1814 |                                                                   |                            | Savchenko et al. 1992          |                          |
| COI    | Insecta | Diptera | Pediciidae     | Pediciinae     | Dicranota    |             | BOLD:ABW5265 |                                                                   |                            | Savchenko et al. 1992          |                          |
| COI    | Insecta | Diptera | Pediciidae     | Uliinae        | Ula          | bolitophila | BOLD:ABU5946 |                                                                   |                            |                                | Savchenko et al. 1992    |
| COI    | Insecta | Diptera | Pediciidae     | Uliinae        | Ula          |             | BOLD:ABA7462 |                                                                   |                            | Savchenko et al. 1992          |                          |
| COI    | Insecta | Diptera | Perisclididae  |                |              |             | BOLD:ADE5755 | Sueyoshi & Mathis 2004                                            |                            |                                |                          |
| COI    | Insecta | Diptera | Phoridae       |                |              |             | BOLD:AAP6413 | Michailovskaya 1998                                               |                            |                                |                          |
| COI    | Insecta | Diptera | Psychodidae    |                |              |             | BOLD:ACO7340 | Sanjoba et al. 2011                                               |                            |                                |                          |
| COI    | Insecta | Diptera | Psychodidae    |                |              |             | BOLD:ADE7332 | Sanjoba et al. 2011                                               |                            |                                |                          |
| COI    | Insecta | Diptera | Psychodidae    |                |              |             | BOLD:ADE8063 | Sanjoba et al. 2011                                               |                            |                                |                          |
| COI    | Insecta | Diptera | Psychodidae    | Psychodinae    | Psychoda     |             | BOLD:AAL7819 | Sanjoba et al. 2011                                               |                            | Kiyoku 1958; Yones et al. 2013 |                          |
| COI    | Insecta | Diptera | Psychodidae    | Psychodinae    | Psychoda     |             | BOLD:ACD9559 | Sanjoba et al. 2011                                               | Yones et al. 2013          | Yones et al. 2013              |                          |
| COI    | Insecta | Diptera | Sarcophagidae  |                |              |             | BOLD:ACU3079 | Verves & Khrokalo 2006                                            |                            |                                |                          |
| COI    | Insecta | Diptera | Sciaridae      |                |              |             | BOLD:ACC1760 | Menzel & Mohrig 2000                                              |                            |                                |                          |
| COI    | Insecta | Diptera | Sciaridae      |                |              |             | BOLD:ACI7364 | Menzel & Mohrig 2000                                              |                            |                                |                          |
| COI    | Insecta | Diptera | Simuliidae     | Simuliinae     | Simulium     |             | BOLD:ABA1846 |                                                                   |                            | Adler & Crosskey 2008          |                          |
| COI    | Insecta | Diptera | Sphaeroceridae | Limosininae    | Opalimosina  | mirabilis   | BOLD:AAN6406 |                                                                   |                            |                                | Hayashi 2010             |
| COI    | Insecta | Diptera | Syrphidae      | Eristalinae    | Ferdinandea  | cuprea      | BOLD:AAJ0402 |                                                                   | Prokhorov et al. 2018      | Khaghaninia et al., 2014       | Khaghaninia et al., 2014 |
| COI    | Insecta | Diptera | Tachinidae     | Exoristinae    | Cyzenis      |             | BOLD:AAP4829 |                                                                   |                            | O'Hara et al. 2019             |                          |
| COI    | Insecta | Diptera | Tachinidae     | Exoristinae    | Drino        |             | BOLD:AAB6198 |                                                                   |                            | O'Hara et al. 2019             |                          |
| COI    | Insecta | Diptera | Tachinidae     | Exoristinae    |              |             | BOLD:AAN9266 |                                                                   |                            | O'Hara et al. 2019             |                          |
| COI    | Insecta | Diptera | Tachinidae     | Exoristinae    | Cadurciella  | tritaeniata | BOLD:AAN9651 |                                                                   |                            |                                | O'Hara et al. 2019       |
| COI    | Insecta | Diptera | Tachinidae     | Exoristinae    | Phebellia    | villica     | BOLD:ACB0760 |                                                                   |                            |                                | O'Hara et al. 2019       |
| COI    | Insecta | Diptera | Tachinidae     |                |              |             | BOLD:AAZ8670 | O'Hara et al. 2019                                                |                            |                                |                          |
| COI    | Insecta | Diptera | Tachinidae     | Exoristinae    |              |             | BOLD:AAC1692 |                                                                   |                            | O'Hara et al. 2019             |                          |

| Primer | Class   | Order       | Family         | Subfamily       | Genus               | Species    | BIN          | Family                    | Subfamily       | Genus                                                                      | Species                                   |
|--------|---------|-------------|----------------|-----------------|---------------------|------------|--------------|---------------------------|-----------------|----------------------------------------------------------------------------|-------------------------------------------|
| COI    | Insecta | Diptera     | Tipulidae      | Tipulinae       | Tipula              | kuzuensis  | BOLD:AAN9034 |                           |                 | Men et al. 2019                                                            | Young et al. 2013                         |
| COI    | Insecta | Diptera     | Tipulidae      | Tipulinae       | Tipula              |            | BOLD:ABV3695 |                           |                 | Men et al. 2019                                                            |                                           |
| COI    | Insecta | Diptera     | Tipulidae      | Tipulinae       | Tipula              |            | BOLD:ABV4667 |                           |                 | Men et al. 2019                                                            |                                           |
| COI    | Insecta | Diptera     | Tipulidae      | Tipulinae       | Tipula              |            | TIPTW088-10  |                           |                 | Men et al. 2019                                                            |                                           |
| COI    | Insecta | Diptera     | Tipulidae      |                 |                     |            | TIPTW093-10  | Men et al. 2019           |                 |                                                                            |                                           |
| COI    | Insecta | Diptera     | Trichoceridae  | Trichocerinae   | Trichocera          |            | BOLD:ACF7745 |                           |                 | Krzeminska 2001 (Trichocera sakaguchii is in Japan; has no record in BOLD) |                                           |
| COI    | Insecta | Hemiptera   | Pentatomidae   |                 |                     |            | BOLD:AAP3528 | Ishikawa & Moriya 2019    |                 |                                                                            |                                           |
| COI    | Insecta | Hemiptera   | Cicadellidae   | Deltocephalinae |                     |            | BOLD:AAG8956 |                           | Luo et al. 2019 |                                                                            |                                           |
| COI    | Insecta | Hemiptera   | Cicadidae      | Cicadinae       | Yezoterpnosia       | nigricosta | BOLD:ACP9813 |                           |                 |                                                                            | 中田 et al. 2006                            |
| COI    | Insecta | Hemiptera   | Psyllidae      |                 |                     |            | BOLD:ACM6872 | Cho et al. 2019           |                 |                                                                            |                                           |
| COI    | Insecta | Hymenoptera | Cimbicidae     | Cimbicinae      | Trichiosoma         |            | BOLD:ACJ7002 |                           |                 | Лелей et al. 2012                                                          |                                           |
| COI    | Insecta | Hymenoptera | Cimbicidae     | Cimbicinae      | Trichiosoma         |            | BOLD:ABZ2163 |                           |                 | Лелей et al. 2012                                                          |                                           |
| COI    | Insecta | Hymenoptera | Ichneumonidae  |                 |                     |            | BOLD:ADI1279 | Watanabe 2015             |                 |                                                                            |                                           |
| COI    | Insecta | Hymenoptera | Pamphiliidae   | Pamphiliinae    | Neurotoma           | nemoralis  | BOLD:AAV6346 |                           |                 |                                                                            | ЛЕЛЕЙ et al. 2016                         |
| COI    | Insecta | Hymenoptera | Pamphiliidae   | Pamphiliinae    | Pamphilius          |            | BOLD:AAK4614 |                           |                 | Лелей et al. 2012                                                          |                                           |
| COI    | Insecta | Hymenoptera |                |                 |                     |            | EII067-15    |                           |                 |                                                                            |                                           |
| COI    | Insecta | Hymenoptera |                |                 |                     |            | EII104-15    |                           |                 |                                                                            |                                           |
| COI    | Insecta | Hymenoptera | Tenthredinidae | Nematinae       | Pristiphora         |            | BOLD:AAK9450 |                           |                 | Лелей et al. 2012                                                          |                                           |
| COI    | Insecta | Lepidoptera | Coleophoridae  | Coleophorinae   | Coleophora          |            | BOLD:AAC8694 |                           |                 | Niwaka & Jimbo 2018; 3                                                     |                                           |
| COI    | Insecta | Lepidoptera | Crambidae      | Scopariinae     | Eudonia             | persimilis | BOLD:AAF1478 |                           |                 |                                                                            | Niwaka & Jimbo 2018; 4                    |
| COI    | Insecta | Lepidoptera |                |                 |                     |            | BOLD:AAF8577 |                           |                 |                                                                            |                                           |
| COI    | Insecta | Lepidoptera |                |                 |                     |            | BOLD:AAG6034 |                           |                 |                                                                            |                                           |
| COI    | Insecta | Lepidoptera | Erebidae       | Arctiinae       |                     |            | BOLD:AAH2626 |                           |                 | ЛЕЛЕЙ et al. 2016                                                          |                                           |
| COI    | Insecta | Lepidoptera | Gelechiidae    | Gelechiinae     |                     |            | BOLD:AAH5654 |                           |                 | ЛЕЛЕЙ et al. 2016                                                          |                                           |
| COI    | Insecta | Lepidoptera | Noctuidae      | Noctuinae       |                     |            | BOLD:AAI3519 |                           |                 | Sayama et al. 2012; ЛЕЛЕЙ et al. 2016                                      |                                           |
| COI    | Insecta | Lepidoptera | Erebidae       |                 |                     |            | BOLD:AAL4384 | Lafontaine & Schmidt 2013 |                 |                                                                            |                                           |
| COI    | Insecta | Lepidoptera | Crambidae      | Spilomelinae    | Pleuroptya/ Patania | expictalis | BOLD:AAL4502 |                           |                 |                                                                            | ЛЕЛЕЙ et al. 2016; Niwaka & Jimbo 2018; 5 |
| COI    | Insecta | Lepidoptera | Erebidae       | Boletobiinae    | Enispa              |            | BOLD:AAL7095 |                           |                 | ЛЕЛЕЙ et al. 2016                                                          |                                           |
| COI    | Insecta | Lepidoptera | Noctuidae      | Noctuinae       |                     |            | BOLD:AAM0480 |                           |                 | Sayama et al. 2012; ЛЕЛЕЙ et al. 2016                                      |                                           |
| COI    | Insecta | Lepidoptera | Notodontidae   | Notodontinae    | Cerura              |            | BOLD:AAM4552 |                           |                 | ЛЕЛЕЙ et al. 2016                                                          |                                           |
| COI    | Insecta | Lepidoptera | Noctuidae      |                 |                     |            | BOLD:AAM9055 | ЛЕЛЕЙ et al. 2016         |                 |                                                                            |                                           |
| COI    | Insecta | Lepidoptera | Noctuidae      | Noctuinae       |                     |            | BOLD:AAM9761 |                           |                 | Sayama et al. 2012; ЛЕЛЕЙ et al. 2016                                      |                                           |
| COI    | Insecta | Lepidoptera | Crambidae      | Pyraustinae     | Goniorhynchus       |            | BOLD:AAN3555 |                           |                 | ЛЕЛЕЙ et al. 2016                                                          |                                           |
| COI    | Insecta | Lepidoptera | Hesperiidae    |                 |                     |            | BOLD:AAN7248 | ЛЕЛЕЙ et al. 2016         |                 |                                                                            |                                           |
| COI    | Insecta | Lepidoptera | Noctuidae      |                 |                     |            | BOLD:AAP1728 | ЛЕЛЕЙ et al. 2016         |                 |                                                                            |                                           |

| Primer | Class   | Order       | Family          | Subfamily       | Genus         | Species         | BIN           | Family                                    | Subfamily                                 | Genus                                     | Species            |
|--------|---------|-------------|-----------------|-----------------|---------------|-----------------|---------------|-------------------------------------------|-------------------------------------------|-------------------------------------------|--------------------|
| COI    | Insecta | Lepidoptera | Geometridae     | Ennominae       |               |                 | BOLD: AAP2372 |                                           | Sayama et al. 2012; ЛЕЛЕЙ et al. 2016     |                                           |                    |
| COI    | Insecta | Lepidoptera | Gelechiidae     |                 |               |                 | BOLD: AAQ1460 | ЛЕЛЕЙ et al. 2016                         |                                           |                                           |                    |
| COI    | Insecta | Lepidoptera | Crambidae       | Spilomelinae    |               |                 | BOLD: AAQ2087 |                                           | ЛЕЛЕЙ et al. 2016                         |                                           |                    |
| COI    | Insecta | Lepidoptera | Geometridae     | Sterrhinae      | Scopula       |                 | BOLD: AAV8961 |                                           |                                           | Sayama et al. 2012                        |                    |
| COI    | Insecta | Lepidoptera | Erebidae        | Arctiinae       |               |                 | BOLD: AAY5858 |                                           | ЛЕЛЕЙ et al. 2016                         |                                           |                    |
| COI    | Insecta | Lepidoptera | Limacodidae     |                 |               |                 | BOLD: AAZ8422 | ЛЕЛЕЙ et al. 2016                         |                                           |                                           |                    |
| COI    | Insecta | Lepidoptera | Tortricidae     | Olethreutinae   | Rhopobota     |                 | BOLD: ABA8634 |                                           |                                           | Sayama et al. 2012                        |                    |
| COI    | Insecta | Lepidoptera | Geometridae     | Larentiinae     | Leptostegna   |                 | BOLD: ABU5788 |                                           |                                           | Sayama et al. 2012                        |                    |
| COI    | Insecta | Lepidoptera | Sphingidae      | Smerinthinae    | Marumba       | gaschkewitschii | BOLD: ABU7231 |                                           |                                           |                                           | Sayama et al. 2012 |
| COI    | Insecta | Lepidoptera |                 |                 |               |                 | BOLD: ABU9226 |                                           |                                           |                                           |                    |
| COI    | Insecta | Lepidoptera | Tortricidae     |                 |               |                 | BOLD: ABW0658 | Sayama et al. 2012, ЛЕЛЕЙ et al. 2016     |                                           |                                           |                    |
| COI    | Insecta | Lepidoptera | Erebidae        | Arctiinae       | Cyana         |                 | BOLD: ABX3752 |                                           |                                           | Sayama et al. 2012                        |                    |
| COI    | Insecta | Lepidoptera | Erebidae        | Erebinae        | Catocala      |                 | BOLD: ABZ3190 |                                           |                                           | ЛЕЛЕЙ et al. 2016                         |                    |
| COI    | Insecta | Lepidoptera | Erebidae        | Arctiinae       |               |                 | BOLD: ACB1726 |                                           | ЛЕЛЕЙ et al. 2016                         |                                           |                    |
| COI    | Insecta | Lepidoptera | Geometridae     | Geometrinae     |               |                 | BOLD: ACE9755 |                                           | ЛЕЛЕЙ et al. 2016                         |                                           |                    |
| COI    | Insecta | Lepidoptera | Autostichidae   |                 |               |                 | BOLD: ACF7812 | Park & Kim 2017                           |                                           |                                           |                    |
| COI    | Insecta | Lepidoptera | Cosmopterigidae |                 |               |                 | BOLD: ACJ1842 | ЛЕЛЕЙ et al. 2016                         |                                           |                                           |                    |
| COI    | Insecta | Lepidoptera | Gelechiidae     | Gelechiinae     | Sopronia      |                 | BOLD: ACL1953 |                                           |                                           | ЛЕЛЕЙ et al. 2016                         |                    |
| COI    | Insecta | Lepidoptera | Geometridae     | Ennominae       |               |                 | BOLD: ACL6993 |                                           |                                           | Sayama et al. 2012; ЛЕЛЕЙ et al. 2016     |                    |
| COI    | Insecta | Lepidoptera |                 |                 |               |                 | BOLD: ACM3459 |                                           |                                           |                                           |                    |
| COI    | Insecta | Lepidoptera | Elachistidae    |                 |               |                 | BOLD: ACM9615 | ЛЕЛЕЙ et al. 2016; Niwaka & Jimbo 2018; 6 |                                           |                                           |                    |
| COI    | Insecta | Lepidoptera | Tortricidae     |                 |               |                 | BOLD: ACN0142 | Sayama et al. 2012, ЛЕЛЕЙ et al. 2016     |                                           |                                           |                    |
| COI    | Insecta | Lepidoptera | Gelechiidae     |                 |               |                 | BOLD: ACN0185 | ЛЕЛЕЙ et al. 2016                         |                                           |                                           |                    |
| COI    | Insecta | Lepidoptera | Tortricidae     | Tortricinae     | Choristoneura |                 | BOLD: ACN0625 |                                           |                                           | ЛЕЛЕЙ et al. 2016                         |                    |
| COI    | Insecta | Lepidoptera | Erebidae        | Herminiinae     |               |                 | BOLD: ACO1434 |                                           | ЛЕЛЕЙ et al. 2016                         |                                           |                    |
| COI    | Insecta | Lepidoptera | Lasiocampidae   | Poecilocampinae |               |                 | BOLD: ACP2255 |                                           | ЛЕЛЕЙ et al. 2016; Niwaka & Jimbo 2018; 7 |                                           |                    |
| COI    | Insecta | Lepidoptera | Gelechiidae     |                 |               |                 | BOLD: ACR6168 | ЛЕЛЕЙ et al. 2016                         |                                           |                                           |                    |
| COI    | Insecta | Lepidoptera | Stathmopodidae  | NA              | Stathmopoda   |                 | BOLD: ACV9615 |                                           | NA                                        | ЛЕЛЕЙ et al. 2016; Niwaka & Jimbo 2018; 8 |                    |
| COI    | Insecta | Lepidoptera |                 |                 |               |                 | BOLD: ACW1375 |                                           |                                           |                                           |                    |
| COI    | Insecta | Lepidoptera |                 |                 |               |                 | BOLD: ACX5590 |                                           |                                           |                                           |                    |
| COI    | Insecta | Lepidoptera | Crambidae       |                 |               |                 | BOLD: ACX6648 | ЛЕЛЕЙ et al. 2016                         |                                           |                                           |                    |
| COI    | Insecta | Lepidoptera |                 |                 |               |                 | BOLD: ADF8756 |                                           |                                           |                                           |                    |
| COI    | Insecta | Lepidoptera |                 |                 |               |                 | BOLD: ADG3051 |                                           |                                           |                                           |                    |
| COI    | Insecta | Lepidoptera |                 |                 |               |                 | BOLD: ADI1550 |                                           |                                           |                                           |                    |

| Primer | Class   | Order       | Family         | Subfamily      | Genus                      | Species     | BIN          | Family                                        | Subfamily                                  | Genus                                      | Species           |
|--------|---------|-------------|----------------|----------------|----------------------------|-------------|--------------|-----------------------------------------------|--------------------------------------------|--------------------------------------------|-------------------|
| COI    | Insecta | Lepidoptera | Tortricidae    | Tortricinae    | Acleris                    | paradiseana | BOLD:ADI2826 |                                               |                                            |                                            | ЛЕЛЕЙ et al. 2016 |
| COI    | Insecta | Lepidoptera |                |                |                            |             | BOLD:ADI2961 |                                               |                                            |                                            |                   |
| COI    | Insecta | Lepidoptera |                |                |                            |             | BOLD:ADI4331 |                                               |                                            |                                            |                   |
| COI    | Insecta | Lepidoptera | Geometridae    | Sterrhinae     | Scopula                    |             | BOLD:ADI7455 |                                               |                                            | Sayama et al. 2012                         |                   |
| COI    | Insecta | Lepidoptera | Geometridae    | Sterrhinae     | Scopula                    |             | BOLD:ADJ2221 |                                               |                                            | Sayama et al. 2012                         |                   |
| COI    | Insecta | Lepidoptera |                |                |                            |             | GWOSS664-11  |                                               |                                            |                                            |                   |
| COI    | Insecta | Lepidoptera | Geometridae    | Geometrinae    |                            |             | NAGEO164-09  |                                               | Sayama et al. 2012                         |                                            |                   |
| COI    | Insecta | Lepidoptera | Autostichidae  | Autostichinae  |                            |             | BOLD:AAC7842 | Park & Kim 2017                               | Park & Kim 2017                            |                                            |                   |
| COI    | Insecta | Lepidoptera | Blastobasidae  | Blastobasinae  | Hypatopa                   |             | BOLD:AAB9632 |                                               |                                            | ЛЕЛЕЙ et al. 2016; Niwaka & Jimbo 2018; 9  |                   |
| COI    | Insecta | Lepidoptera | Blastobasidae  | Blastobasinae  |                            |             | BOLD:AAX6193 |                                               | ЛЕЛЕЙ et al. 2016                          |                                            |                   |
| COI    | Insecta | Lepidoptera | Coleophoridae  | Coleophorinae  | Coleophora                 |             | BOLD:AAB8487 |                                               |                                            | Niwaka & Jimbo 2018; 10                    |                   |
| COI    | Insecta | Lepidoptera | Crambidae      | Pyraustinae    | Pyrausta/<br>Goniorhynchus |             | BOLD:AAD0032 |                                               |                                            | ЛЕЛЕЙ et al. 2016; Niwaka & Jimbo 2018; 11 |                   |
| COI    | Insecta | Lepidoptera |                |                |                            |             | BOLD:ACM1938 |                                               |                                            |                                            |                   |
| COI    | Insecta | Lepidoptera | Crambidae      | Acentropinae   | Nymphula/Elophila          |             | BOLD:AAF2874 |                                               |                                            | ЛЕЛЕЙ et al. 2016; Chen et al. 2010        |                   |
| COI    | Insecta | Lepidoptera | Crambidae      | Spilomelinae   | Palpita                    |             | BOLD:AAD6468 |                                               |                                            | Sayama et al. 2012                         |                   |
| COI    | Insecta | Lepidoptera | Crambidae      | Spilomelinae   |                            |             | BOLD:AAB6255 |                                               | ЛЕЛЕЙ et al. 2016; Niwaka & Jimbo 2018; 12 |                                            |                   |
| COI    | Insecta | Lepidoptera | Crambidae      | Spilomelinae   | Pleuroptya/Patania         |             | BOLD:AAB6257 |                                               |                                            | ЛЕЛЕЙ et al. 2016                          |                   |
| COI    | Insecta | Lepidoptera | Depressariidae |                |                            |             | BOLD:AAY5033 | ЛЕЛЕЙ et al. 2016                             |                                            |                                            |                   |
| COI    | Insecta | Lepidoptera | Depressariidae | Depressariinae | Agonopterix                |             | BOLD:AAF7176 |                                               |                                            | ЛЕЛЕЙ et al. 2016                          |                   |
| COI    | Insecta | Lepidoptera | Depressariidae | Depressariinae | Depressaria                |             | BOLD:ACN1500 |                                               |                                            | ЛЕЛЕЙ et al. 2016                          |                   |
| COI    | Insecta | Lepidoptera | Depressariidae |                |                            |             | BOLD:ACE7937 | Buchner & Stănescu 2019;<br>ЛЕЛЕЙ et al. 2016 |                                            |                                            |                   |
| COI    | Insecta | Lepidoptera | Drepanidae     | Thyatirinae    | Tetheella                  | fluctuosa   | BOLD:AAD3647 |                                               |                                            |                                            | ЛЕЛЕЙ et al. 2016 |
| COI    | Insecta | Lepidoptera | Erebidae       |                |                            |             | BOLD:AAB7538 | ЛЕЛЕЙ et al. 2016                             |                                            |                                            |                   |
| COI    | Insecta | Lepidoptera | Erebidae       | Erebinae       | Catocala                   |             | BOLD:AAE9541 |                                               |                                            | Sayama et al. 2012                         |                   |
| COI    | Insecta | Lepidoptera | Erebidae       | Arctiinae      |                            |             | BOLD:AAC3572 |                                               | ЛЕЛЕЙ et al. 2016                          |                                            |                   |
| COI    | Insecta | Lepidoptera | Erebidae       | Hypeninae      |                            |             | BOLD:AAC7130 |                                               | ЛЕЛЕЙ et al. 2016                          |                                            |                   |
| COI    | Insecta | Lepidoptera | Erebidae       | Erebinae       | Ercheia                    |             | BOLD:AAD8285 |                                               |                                            | Niwaka & Jimbo 2018; 13                    |                   |
| COI    | Insecta | Lepidoptera | Erebidae       | Erebinae       | Thyas                      | juno        | BOLD:AAF1405 |                                               |                                            |                                            | ЛЕЛЕЙ et al. 2016 |
| COI    | Insecta | Lepidoptera | Erebidae       | Erebinae       |                            |             | BOLD:ABX5513 |                                               | ЛЕЛЕЙ et al. 2016                          |                                            |                   |
| COI    | Insecta | Lepidoptera | Erebidae       | Arctiinae      |                            |             | BOLD:ACE8889 |                                               | ЛЕЛЕЙ et al. 2016                          |                                            |                   |
| COI    | Insecta | Lepidoptera | Erebidae       |                |                            |             | BOLD:ACT9815 | ЛЕЛЕЙ et al. 2016                             |                                            |                                            |                   |
| COI    | Insecta | Lepidoptera | Erebidae       |                |                            |             | BOLD:ADF0678 | ЛЕЛЕЙ et al. 2016                             |                                            |                                            |                   |
| COI    | Insecta | Lepidoptera | Erebidae       | Herminiinae    | Hydrillodes                |             | BOLD:ACU0270 |                                               |                                            | ЛЕЛЕЙ et al. 2016                          |                   |
| COI    | Insecta | Lepidoptera |                |                |                            |             | BOLD:AAV8834 |                                               |                                            |                                            |                   |
| COI    | Insecta | Lepidoptera | Erebidae       | Lymantriinae   | Lymantria                  | dispar      | BOLD:AAA2052 |                                               |                                            |                                            | ЛЕЛЕЙ et al. 2016 |

| Primer | Class   | Order       | Family      | Subfamily    | Genus        | Species        | BIN          | Family                                | Subfamily                             | Genus                                 | Species            |
|--------|---------|-------------|-------------|--------------|--------------|----------------|--------------|---------------------------------------|---------------------------------------|---------------------------------------|--------------------|
| COI    | Insecta | Lepidoptera | Erebidae    | Lymantriinae | Lymantria    | monacha        | BOLD:AAA5537 |                                       |                                       |                                       | ЛЕЛЕЙ et al. 2016  |
| COI    | Insecta | Lepidoptera | Erebidae    | Pangraptinae | Pangrapta    |                | BOLD:ADF1765 |                                       |                                       | ЛЕЛЕЙ et al. 2016                     |                    |
| COI    | Insecta | Lepidoptera | Gelechiidae | Gelechiinae  | Gelechia     | cuneatella     | BOLD:AAF5086 |                                       |                                       |                                       | ЛЕЛЕЙ et al. 2016  |
| COI    | Insecta | Lepidoptera | Gelechiidae | Gelechiinae  | Psoricoptera | gibbosella     | BOLD:AAD0608 |                                       |                                       |                                       | ЛЕЛЕЙ et al. 2016  |
| COI    | Insecta | Lepidoptera | Gelechiidae |              |              |                | BOLD:ABA1140 | ЛЕЛЕЙ et al. 2016                     |                                       |                                       |                    |
| COI    | Insecta | Lepidoptera | Geometridae | Ennominae    |              |                | BOLD:ACG8719 |                                       | Sayama et al. 2012; ЛЕЛЕЙ et al. 2016 |                                       |                    |
| COI    | Insecta | Lepidoptera | Geometridae | Ennominae    | Cleora       | insolita       | BOLD:ACJ3813 |                                       |                                       |                                       | ЛЕЛЕЙ et al. 2016  |
| COI    | Insecta | Lepidoptera | Geometridae | Ennominae    |              |                | BOLD:AAC6655 |                                       | Sayama et al. 2012                    |                                       |                    |
| COI    | Insecta | Lepidoptera | Geometridae | Ennominae    | Deileptenia  | ribeata        | BOLD:AAC3800 |                                       |                                       |                                       | Sayama et al. 2012 |
| COI    | Insecta | Lepidoptera | Geometridae | Ennominae    | Ectropis     |                | BOLD:AAB5227 |                                       | Sayama et al. 2012                    |                                       |                    |
| COI    | Insecta | Lepidoptera | Geometridae | Ennominae    | Ectropis     | crepuscularia  | BOLD:AAA2076 |                                       |                                       |                                       | Sayama et al. 2012 |
| COI    | Insecta | Lepidoptera | Geometridae | Ennominae    | Endropiodes  |                | BOLD:AAF7479 |                                       |                                       | ЛЕЛЕЙ et al. 2016                     |                    |
| COI    | Insecta | Lepidoptera | Geometridae | Larentiinae  | Gandaritis   | fixseni        | BOLD:AAY1335 |                                       |                                       |                                       | Sayama et al. 2012 |
| COI    | Insecta | Lepidoptera | Geometridae | Larentiinae  | Gandaritis   |                | BOLD:AAB5983 |                                       | Sayama et al. 2012                    |                                       |                    |
| COI    | Insecta | Lepidoptera | Geometridae | Geometrinae  | Geometra     |                | BOLD:AAB2011 |                                       | Sayama et al. 2012                    | Sayama et al. 2012; ЛЕЛЕЙ et al. 2016 |                    |
| COI    | Insecta | Lepidoptera | Geometridae | Ennominae    | Protoboarmia |                | BOLD:AAA2077 |                                       |                                       | Sayama et al. 2012                    |                    |
| COI    | Insecta | Lepidoptera | Geometridae | Larentiinae  | Eupithecia   |                | BOLD:AAA2083 |                                       | Sayama et al. 2012                    |                                       |                    |
| COI    | Insecta | Lepidoptera | Geometridae | Sterrhinae   | Cyclophora   |                | BOLD:AAD6021 |                                       |                                       | ЛЕЛЕЙ et al. 2016                     |                    |
| COI    | Insecta | Lepidoptera | Geometridae | Geometrinae  |              |                | BOLD:AAE5087 |                                       | ЛЕЛЕЙ et al. 2016                     |                                       |                    |
| COI    | Insecta | Lepidoptera | Geometridae | Ennominae    |              |                | BOLD:AAE6522 |                                       | Sayama et al. 2012; ЛЕЛЕЙ et al. 2016 |                                       |                    |
| COI    | Insecta | Lepidoptera | Geometridae | Ennominae    | Menophra     | senilis        | BOLD:AAF3823 |                                       |                                       |                                       | Sayama et al. 2012 |
| COI    | Insecta | Lepidoptera | Geometridae | Ennominae    |              |                | BOLD:AAL8521 |                                       | Sayama et al. 2012; ЛЕЛЕЙ et al. 2016 |                                       |                    |
| COI    | Insecta | Lepidoptera | Geometridae | Ennominae    |              |                | BOLD:AAP9222 |                                       | Sayama et al. 2012; ЛЕЛЕЙ et al. 2016 |                                       |                    |
| COI    | Insecta | Lepidoptera | Geometridae |              |              |                | BOLD:AAZ1901 | Yoshida 1991                          |                                       |                                       |                    |
| COI    | Insecta | Lepidoptera | Geometridae | Ennominae    |              |                | BOLD:ABU6285 |                                       | Sayama et al. 2012; ЛЕЛЕЙ et al. 2016 |                                       |                    |
| COI    | Insecta | Lepidoptera | Geometridae | Geometrinae  | Jodis        | putata         | BOLD:ABZ4040 |                                       |                                       |                                       | ЛЕЛЕЙ et al. 2016  |
| COI    | Insecta | Lepidoptera | Geometridae | Larentiinae  |              |                | BOLD:ACB9627 |                                       |                                       | ЛЕЛЕЙ et al. 2016                     |                    |
| COI    | Insecta | Lepidoptera | Geometridae |              |              |                | BOLD:ADF1852 | Sayama et al. 2012, ЛЕЛЕЙ et al. 2016 |                                       |                                       |                    |
| COI    | Insecta | Lepidoptera | Geometridae | Sterrhinae   | Scopula      |                | LNAUS1341-13 |                                       |                                       | Sayama et al. 2012                    |                    |
| COI    | Insecta | Lepidoptera | Geometridae | Ennominae    | Hypomecis    | punctinalis    | BOLD:ACA2461 |                                       |                                       |                                       | Sayama et al. 2012 |
| COI    | Insecta | Lepidoptera | Geometridae | Ennominae    |              |                | BOLD:ACS9064 |                                       | Sayama et al. 2012; ЛЕЛЕЙ et al. 2016 |                                       |                    |
| COI    | Insecta | Lepidoptera | Geometridae | Ennominae    |              |                | BOLD:AAB6560 |                                       | ЛЕЛЕЙ et al. 2016                     |                                       |                    |
| COI    | Insecta | Lepidoptera | Geometridae | Ennominae    | Ourapteryx   | maculicaudaria | BOLD:AAW9443 |                                       |                                       |                                       | ЛЕЛЕЙ et al. 2016  |



| Primer | Class   | Order       | Family         | Subfamily      | Genus          | Species      | BIN          | Family                                                       | Subfamily                             | Genus                                                            | Species                                                                                                      |
|--------|---------|-------------|----------------|----------------|----------------|--------------|--------------|--------------------------------------------------------------|---------------------------------------|------------------------------------------------------------------|--------------------------------------------------------------------------------------------------------------|
| COI    | Insecta | Lepidoptera | Geometridae    | Ennominae      |                |              | BOLD:AAA2521 |                                                              | Sayama et al. 2012; ЛЕЛЕЙ et al. 2016 |                                                                  |                                                                                                              |
| COI    | Insecta | Lepidoptera | Geometridae    | Ennominae      | Phthonosema    | tendinosaria | BOLD:AAF6489 |                                                              |                                       |                                                                  | ЛЕЛЕЙ et al. 2016                                                                                            |
| COI    | Insecta | Lepidoptera | Gracillariidae | Gracillariinae | Caloptilia     | cf. heringi  | BOLD:ADK1669 |                                                              |                                       |                                                                  | ЛЕЛЕЙ et al. 2016                                                                                            |
| COI    | Insecta | Lepidoptera | Gracillariidae | Gracillariinae | Caloptilia     | hidakensis   | BOLD:AAK1674 |                                                              |                                       |                                                                  | ЛЕЛЕЙ et al. 2016                                                                                            |
| COI    | Insecta | Lepidoptera | Gracillariidae | Gracillariinae | Caloptilia     |              | BOLD:ACL6329 |                                                              |                                       | ЛЕЛЕЙ et al. 2016                                                |                                                                                                              |
| COI    | Insecta | Lepidoptera | Gracillariidae | Gracillariinae |                |              | BOLD:ADK2510 |                                                              | ЛЕЛЕЙ et al. 2016                     |                                                                  |                                                                                                              |
| COI    | Insecta | Lepidoptera | Hepialidae     | Hepialinae     |                |              | BOLD:AAO2948 |                                                              | Niwaka & Jimbo 2018; 14               |                                                                  |                                                                                                              |
| COI    | Insecta | Lepidoptera | Hepialidae     | Hepialinae     |                |              | BOLD:ACN8703 |                                                              | Niwaka & Jimbo 2018; 15               |                                                                  |                                                                                                              |
| COI    | Insecta | Lepidoptera | Hesperiidae    | Coeliadinae    | Burara/Bibasis | aquilina     | BOLD:ACD6545 |                                                              |                                       |                                                                  | Tsukiji 2020; 16                                                                                             |
| COI    | Insecta | Lepidoptera | Hesperiidae    | Hesperiinae    |                |              | LIMBC545-11  | ЛЕЛЕЙ et al. 2016                                            | ЛЕЛЕЙ et al. 2016                     |                                                                  |                                                                                                              |
| COI    | Insecta | Lepidoptera | Hesperiidae    | Hesperiinae    | Thoressa       | varia        | BOLD:ADK0840 |                                                              |                                       |                                                                  | Tsukiji 2020; 17<br>Sayama et al. 2012; Niwaka & Jimbo 2018; 18                                              |
| COI    | Insecta | Lepidoptera | Lasiocampidae  | Lasiocampinae  | Euthrix        | potatoria    | BOLD:AAC1584 |                                                              |                                       |                                                                  |                                                                                                              |
| COI    | Insecta | Lepidoptera | Lecithoceridae |                |                |              | BOLD:AAD6680 | Park et al. 2020; ЛЕЛЕЙ et al. 2016; Niwaka & Jimbo 2018; 19 |                                       |                                                                  |                                                                                                              |
| COI    | Insecta | Lepidoptera | Limacodidae    | Limacodinae    |                |              | BOLD:ACE6221 |                                                              | Sayama et al. 2012                    |                                                                  |                                                                                                              |
| COI    | Insecta | Lepidoptera | Limacodidae    | Limacodinae    |                |              | BOLD:AAA9203 |                                                              | Sayama et al. 2012                    |                                                                  |                                                                                                              |
| COI    | Insecta | Lepidoptera | Limacodidae    |                |                |              | BOLD:ACC2517 | ЛЕЛЕЙ et al. 2016                                            |                                       |                                                                  |                                                                                                              |
| COI    | Insecta | Lepidoptera | Limacodidae    | Limacodinae    | Parasa         |              | BOLD:AAM0823 |                                                              |                                       | Sayama et al. 2012<br>ЛЕЛЕЙ et al. 2016; Niwaka & Jimbo 2018; 20 |                                                                                                              |
| COI    | Insecta | Lepidoptera | Limacodidae    | Limacodinae    | Phrixolepia    |              | BOLD:AAV5028 |                                                              |                                       |                                                                  |                                                                                                              |
| COI    | Insecta | Lepidoptera | Lycaenidae     | Theclinae      | Rapala         |              | BOLD:AAL1375 |                                                              | ЛЕЛЕЙ et al. 2016                     |                                                                  | Korshunov & Gorbunov, 1995<br>Sayama et al. 2012; ЛЕЛЕЙ et al. 2016<br>ЛЕЛЕЙ et al. 2016; Sayama et al. 2012 |
| COI    | Insecta | Lepidoptera | Noctuidae      | Acronictinae   | Acronicta      |              | BOLD:ADK0044 |                                                              |                                       |                                                                  |                                                                                                              |
| COI    | Insecta | Lepidoptera | Noctuidae      | Pantheinae     | Anacronicta    |              | BOLD:AAK1458 |                                                              |                                       |                                                                  |                                                                                                              |
| COI    | Insecta | Lepidoptera | Noctuidae      | Noctuinae      | Apamea         | helva        | BOLD:AAC5412 |                                                              |                                       |                                                                  | ЛЕЛЕЙ et al. 2016                                                                                            |
| COI    | Insecta | Lepidoptera | Noctuidae      | Noctuinae      | Athetis        |              | BOLD:AAV0425 |                                                              |                                       | ЛЕЛЕЙ et al. 2016                                                |                                                                                                              |
| COI    | Insecta | Lepidoptera | Noctuidae      | Acronictinae   | Belciades      | niveola      | BOLD:ACU0724 |                                                              |                                       |                                                                  | Sayama et al. 2012; ЛЕЛЕЙ et al. 2016                                                                        |
| COI    | Insecta | Lepidoptera | Noctuidae      | Amphipyriinae  | Brachionycha   | nubeculosa   | BOLD:AAE0860 |                                                              |                                       |                                                                  | ЛЕЛЕЙ et al. 2016                                                                                            |
| COI    | Insecta | Lepidoptera |                |                |                |              | BOLD:ADF8757 |                                                              |                                       |                                                                  |                                                                                                              |
| COI    | Insecta | Lepidoptera | Noctuidae      |                |                |              | BOLD:ACT9151 | Sayama et al. 2012; Niwaka & Jimbo 2018; 21                  |                                       |                                                                  |                                                                                                              |
| COI    | Insecta | Lepidoptera | Noctuidae      | Noctuinae      |                |              | BOLD:ACJ1078 |                                                              | Sayama et al. 2012; ЛЕЛЕЙ et al. 2016 |                                                                  |                                                                                                              |
| COI    | Insecta | Lepidoptera | Noctuidae      | Oncocnemidinae |                |              | BOLD:AAE4319 |                                                              | ЛЕЛЕЙ et al. 2016                     |                                                                  |                                                                                                              |
| COI    | Insecta | Lepidoptera | Noctuidae      | Plusiinae      |                |              | BOLD:AAE7504 |                                                              | ЛЕЛЕЙ et al. 2016                     |                                                                  |                                                                                                              |
| COI    | Insecta | Lepidoptera | Noctuidae      | Amphipyriinae  |                |              | BOLD:AAW4866 |                                                              | ЛЕЛЕЙ et al. 2016                     |                                                                  |                                                                                                              |
| COI    | Insecta | Lepidoptera | Noctuidae      | Noctuinae      | Leucania       |              | BOLD:AAJ2503 |                                                              |                                       | ЛЕЛЕЙ et al. 2016                                                |                                                                                                              |
| COI    | Insecta | Lepidoptera | Noctuidae      | Noctuinae      | Lithophane     | socia        | BOLD:AAE6607 |                                                              |                                       |                                                                  | ЛЕЛЕЙ et al. 2016                                                                                            |

| Primer | Class   | Order       | Family         | Subfamily      | Genus       | Species     | BIN          | Family                                | Subfamily                                  | Genus                                      | Species                                    |
|--------|---------|-------------|----------------|----------------|-------------|-------------|--------------|---------------------------------------|--------------------------------------------|--------------------------------------------|--------------------------------------------|
| COI    | Insecta | Lepidoptera | Noctuidae      | Noctuinae      | Spodoptera  | exigua      | BOLD:AAA6644 |                                       |                                            |                                            | ЛЕЛЕЙ et al. 2016                          |
| COI    | Insecta | Lepidoptera | Noctuidae      | Noctuinae      | Spodoptera  | cilium      | BOLD:AAC8279 |                                       |                                            | ЛЕЛЕЙ et al. 2016                          | Ratnasingham & Hebert 2007                 |
| COI    | Insecta | Lepidoptera | Noctuidae      | Amphipyriinae  |             |             | BOLD:AAH5319 |                                       |                                            | ЛЕЛЕЙ et al. 2016                          |                                            |
| COI    | Insecta | Lepidoptera |                |                |             |             | BOLD:ADG3545 |                                       |                                            |                                            |                                            |
| COI    | Insecta | Lepidoptera |                |                |             |             | BOLD:AAB6211 |                                       |                                            |                                            |                                            |
| COI    | Insecta | Lepidoptera | Noctuidae      | Noctuinae      |             |             | BOLD:AAB6980 |                                       | Sayama et al. 2012; ЛЕЛЕЙ et al. 2016      |                                            |                                            |
| COI    | Insecta | Lepidoptera | Noctuidae      | Noctuinae      | Xylena      |             | BOLD:AAE4735 |                                       |                                            | ЛЕЛЕЙ et al. 2016                          |                                            |
| COI    | Insecta | Lepidoptera | Nolidae        | Chloephorinae  | Nycteola    |             | BOLD:AAE2641 |                                       |                                            | ЛЕЛЕЙ et al. 2016                          |                                            |
| COI    | Insecta | Lepidoptera | Nolidae        | Nolinae        | Nola        | confusalis  | BOLD:AAB5563 |                                       |                                            |                                            | Sayama et al. 2012                         |
| COI    | Insecta | Lepidoptera | Nolidae        | Nolinae        |             |             | BOLD:AAL7275 |                                       | Sayama et al. 2012                         |                                            |                                            |
| COI    | Insecta | Lepidoptera | Nolidae        | Chloephorinae  | Pseudoips   | prasinana   | BOLD:AAB8807 |                                       |                                            |                                            | ЛЕЛЕЙ et al. 2016                          |
| COI    | Insecta | Lepidoptera | Notodontidae   |                |             |             | BOLD:AAM3801 | ЛЕЛЕЙ et al. 2016                     |                                            |                                            |                                            |
| COI    | Insecta | Lepidoptera | Notodontidae   | Notodontinae   |             |             | BOLD:AAL6465 |                                       | Sayama et al. 2012, ЛЕЛЕЙ et al. 2016      |                                            |                                            |
| COI    | Insecta | Lepidoptera | Notodontidae   | Heterocampinae |             |             | BOLD:AAM4825 | ЛЕЛЕЙ et al. 2016                     |                                            |                                            | Ratnasingham & Hebert 2007                 |
| COI    | Insecta | Lepidoptera | Notodontidae   | Notodontinae   | Notodonta   |             | BOLD:AAC1146 |                                       |                                            | ЛЕЛЕЙ et al. 2016                          |                                            |
| COI    | Insecta | Lepidoptera | Notodontidae   | Notodontinae   | Shaka       |             | BOLD:ACJ1076 |                                       |                                            | Tsukiji 2020; 22                           |                                            |
| COI    | Insecta | Lepidoptera | Notodontidae   | Heterocampinae | Stauropus   | fagi        | BOLD:AAD0646 |                                       |                                            |                                            | Sayama et al. 2012                         |
| COI    | Insecta | Lepidoptera | Nymphalidae    | Heliconiinae   | Boloria     |             | BOLD:AAB9155 |                                       |                                            | ЛЕЛЕЙ et al. 2016, Simonsen 2005           |                                            |
| COI    | Insecta | Lepidoptera | Oecophoridae   | Oecophorinae   |             |             | BOLD:AAF9734 |                                       | ЛЕЛЕЙ et al. 2016                          |                                            |                                            |
| COI    | Insecta | Lepidoptera | Papilionidae   | Papilioninae   | Papilio     |             | BOLD:AAI5285 |                                       |                                            | ЛЕЛЕЙ et al. 2016                          |                                            |
| COI    | Insecta | Lepidoptera | Pyralidae      | Pyralinae      | Endotricha  | olivacealis | BOLD:ACI9403 |                                       |                                            |                                            | ЛЕЛЕЙ et al. 2016; Niwaka & Jimbo 2018; 23 |
| COI    | Insecta | Lepidoptera | Saturniidae    |                |             |             | BOLD:AAA5428 | Sayama et al. 2012; ЛЕЛЕЙ et al. 2016 |                                            |                                            |                                            |
| COI    | Insecta | Lepidoptera | Saturniidae    | Saturniinae    | Saturnia    |             | BOLD:AAB9581 |                                       | Sayama et al. 2012                         | Sayama et al. 2012                         |                                            |
| COI    | Insecta | Lepidoptera | Saturniidae    | Saturniinae    | Saturnia    | jonasii     | BOLD:AAD1452 |                                       |                                            |                                            | Sayama et al. 2012                         |
| COI    | Insecta | Lepidoptera | Sphingidae     | Smerinthinae   | Callambulyx |             | BOLD:ABY4871 |                                       |                                            | Sayama et al. 2012                         |                                            |
| COI    | Insecta | Lepidoptera | Sphingidae     | Macroglossinae |             |             | BOLD:AAB0931 |                                       | ЛЕЛЕЙ et al. 2016; Niwaka & Jimbo 2018; 24 |                                            |                                            |
| COI    | Insecta | Lepidoptera | Sphingidae     | Sphinginae     | Sphinx      | ligustri    | BOLD:AAB6107 |                                       |                                            | ЛЕЛЕЙ et al. 2016; Niwaka & Jimbo 2018; 25 | ЛЕЛЕЙ et al. 2016                          |
| COI    | Insecta | Lepidoptera | Sphingidae     | Sphinginae     | Sphinx      |             | BOLD:ACF5246 |                                       |                                            |                                            |                                            |
| COI    | Insecta | Lepidoptera | Stathmopodidae | NA             | Stathmopoda | pedella     | BOLD:AAD4282 |                                       |                                            |                                            | ЛЕЛЕЙ et al. 2016; Niwaka & Jimbo 2018; 26 |
| COI    | Insecta | Lepidoptera | Tineidae       | Scardiinae     | Morophaga   | bucephala   | BOLD:AAG8510 |                                       |                                            |                                            | Sayama et al. 2012                         |
| COI    | Insecta | Lepidoptera | Tortricidae    | Tortricinae    |             |             | BOLD:AAC3136 |                                       | Sayama et al. 2012, ЛЕЛЕЙ et al. 2016      |                                            |                                            |
| COI    | Insecta | Lepidoptera | Tortricidae    | Tortricinae    | Archips     | betulana    | BOLD:ACM3437 |                                       |                                            |                                            | ЛЕЛЕЙ et al. 2016                          |
| COI    | Insecta | Lepidoptera | Tortricidae    | Tortricinae    | Archips     |             | BOLD:AAB5839 |                                       |                                            | Sayama et al. 2012, ЛЕЛЕЙ et al. 2016      |                                            |

| Primer | Class   | Order       | Family        | Subfamily         | Genus         | Species      | BIN          | Family | Subfamily                             | Genus                                 | Species                                          |
|--------|---------|-------------|---------------|-------------------|---------------|--------------|--------------|--------|---------------------------------------|---------------------------------------|--------------------------------------------------|
| COI    | Insecta | Lepidoptera | Tortricidae   | Tortricinae       | Choristoneura | diversana    | BOLD:AAD8048 |        |                                       | ЛЕЛЕЙ et al. 2016                     | ЛЕЛЕЙ et al. 2016;<br>北海道森林害虫図鑑<br>(affrc.go.jp) |
| COI    | Insecta | Lepidoptera | Tortricidae   | Tortricinae       |               |              | BOLD:ACT2120 |        | Sayama et al. 2012, ЛЕЛЕЙ et al. 2016 |                                       |                                                  |
| COI    | Insecta | Lepidoptera | Tortricidae   | Tortricinae       | Dichelia      |              | ANICU1645-11 |        |                                       | ЛЕЛЕЙ et al. 2016                     |                                                  |
| COI    | Insecta | Lepidoptera | Tortricidae   | Tortricinae       | Eana          | incanana     | BOLD:AAD7476 |        |                                       |                                       | Niwaka & Jimbo 2018; 27                          |
| COI    | Insecta | Lepidoptera | Tortricidae   | Olethreutinae     | Epinotia      |              | BOLD:AAE1784 |        |                                       | Sayama et al. 2012                    |                                                  |
| COI    | Insecta | Lepidoptera | Tortricidae   | Olethreutinae     | Epinotia      | nisella      | BOLD:AAA7530 |        |                                       | Sayama et al. 2012                    | ЛЕЛЕЙ et al. 2016                                |
| COI    | Insecta | Lepidoptera | Tortricidae   | Olethreutinae     | Eudemis       | porphyra     | BOLD:AAC6854 |        |                                       |                                       | ЛЕЛЕЙ et al. 2016                                |
| COI    | Insecta | Lepidoptera | Tortricidae   | Olethreutinae     | Gypsonoma     | dealbana     | BOLD:AAB0380 |        |                                       |                                       | Sayama et al. 2012                               |
| COI    | Insecta | Lepidoptera | Tortricidae   | Olethreutinae     | Lobesia       |              | BOLD:ABV8007 |        |                                       | ЛЕЛЕЙ et al. 2016                     |                                                  |
| COI    | Insecta | Lepidoptera | Tortricidae   | Olethreutinae     |               |              | BOLD:ABZ7645 |        | Sayama et al. 2012                    |                                       |                                                  |
| COI    | Insecta | Lepidoptera | Tortricidae   | Olethreutinae     | Olethreutes   |              | BOLD:ACS0054 |        |                                       | Niwaka & Jimbo 2018; 28               |                                                  |
| COI    | Insecta | Lepidoptera | Tortricidae   | Tortricinae       | Pandemis      | cinnamomeana | BOLD:AAD0575 |        |                                       |                                       | ЛЕЛЕЙ et al. 2016                                |
| COI    | Insecta | Lepidoptera | Tortricidae   | Tortricinae       | Pandemis      | corylana     | BOLD:AAC5400 |        |                                       |                                       | ЛЕЛЕЙ et al. 2016                                |
| COI    | Insecta | Lepidoptera | Tortricidae   | Olethreutinae     | Phiaris       |              | BOLD:AAJ2026 |        |                                       | ЛЕЛЕЙ et al. 2016                     |                                                  |
| COI    | Insecta | Lepidoptera | Tortricidae   | Tortricinae       | Ptycholoma    | lecheanum    | BOLD:AAD3264 |        |                                       |                                       | Tsukiji 2020; 29                                 |
| COI    | Insecta | Lepidoptera | Tortricidae   | Olethreutinae     | Rhopobota     | naevana      | BOLD:AAA9812 |        |                                       |                                       | Sayama et al. 2012                               |
| COI    | Insecta | Lepidoptera | Tortricidae   | Olethreutinae     |               |              | BOLD:AAA0213 |        | Niwaka & Jimbo 2018; 30               |                                       |                                                  |
| COI    | Insecta | Lepidoptera | Tortricidae   | Olethreutinae     | Spilonota     | laricana     | BOLD:AAA7739 |        |                                       |                                       | ЛЕЛЕЙ et al. 2016                                |
| COI    | Insecta | Lepidoptera | Tortricidae   | Tortricinae       | Archips       | crataeganus  | BOLD:AAD6620 |        |                                       | Sayama et al. 2012, ЛЕЛЕЙ et al. 2016 | Bong-kyu et al. 2003                             |
| COI    | Insecta | Lepidoptera |               |                   |               |              | BOLD:AAH4639 |        |                                       |                                       |                                                  |
| COI    | Insecta | Lepidoptera | Tortricidae   | Olethreutinae     | Epinotia      |              | BOLD:AAN7425 |        |                                       | Sayama et al. 2012                    |                                                  |
| COI    | Insecta | Lepidoptera | Tortricidae   | Olethreutinae     |               |              | BOLD:AAV9504 |        | Sayama et al. 2012                    |                                       |                                                  |
| COI    | Insecta | Lepidoptera | Tortricidae   |                   |               |              | BOLD:ADE9961 |        | Sayama et al. 2012, ЛЕЛЕЙ et al. 2016 |                                       |                                                  |
| COI    | Insecta | Lepidoptera | Tortricidae   | Tortricinae       |               |              | BOLD:ACP8754 |        | Sayama et al. 2012, ЛЕЛЕЙ et al. 2016 |                                       |                                                  |
| COI    | Insecta | Lepidoptera | Tortricidae   | Olethreutinae     | Zeiraphera    | rufimitrana  | BOLD:AAM3356 |        |                                       |                                       | ЛЕЛЕЙ et al. 2016                                |
| COI    | Insecta | Lepidoptera | Uraniidae     | Uraniinae         |               |              | BOLD:ACF4699 |        |                                       | ЛЕЛЕЙ et al. 2016                     |                                                  |
| COI    | Insecta | Lepidoptera | Yponomeutidae | Yponomeutinae     |               |              | BOLD:AAE4109 |        |                                       | ЛЕЛЕЙ et al. 2016; Na et al. 2018     |                                                  |
| COI    | Insecta | Lepidoptera | Ypsolophidae  | Ypsolophinae      | Ypsolopha     | vittella     | BOLD:AAD9548 |        |                                       |                                       | ЛЕЛЕЙ et al. 2016                                |
| COI    | Insecta | Lepidoptera |               |                   |               |              | BOLD:AAD3218 |        |                                       |                                       |                                                  |
| COI    | Insecta | Mecoptera   | Panorpidae    | Panorpiniae       | Panorpa       | pryeri       | BOLD:ACA3726 |        |                                       |                                       | 中田 et al. 2006                                   |
| COI    | Insecta | Neuroptera  | Hemerobiidae  | Drepanopteryginae | Drepanopteryx |              | BOLD:ACT2374 |        |                                       | Dobosz et al. 2019                    |                                                  |
| COI    | Insecta | Neuroptera  | Hemerobiidae  | Hemerobiinae      | Hemerobius    |              | BOLD:AAG0897 |        |                                       | Tsukiji 2020; 31                      |                                                  |
| COI    | Insecta | Neuroptera  | Hemerobiidae  | Hemerobiinae      | Hemerobius    |              | BOLD:ABZ0149 |        |                                       | Tsukiji 2020; 32                      |                                                  |
| COI    | Insecta | Neuroptera  | Hemerobiidae  | Hemerobiinae      | Hemerobius    | fenestratus  | BOLD:AAU3559 |        |                                       |                                       | Dobosz et al. 2019                               |

| Primer | Class     | Order       | Family           | Subfamily        | Genus         | Species           | BIN          | Family                     | Subfamily              | Genus                      | Species               |
|--------|-----------|-------------|------------------|------------------|---------------|-------------------|--------------|----------------------------|------------------------|----------------------------|-----------------------|
| COI    | Insecta   | Neuroptera  | Hemerobiidae     | Hemerobiinae     | Hemerobius    | simulans          | BOLD:ACM1832 |                            |                        |                            | Dobosz et al. 2019    |
| COI    | Insecta   | Neuroptera  | Hemerobiidae     | Hemerobiinae     |               |                   | BOLD:ABU9030 |                            |                        |                            |                       |
| COI    | Insecta   | Neuroptera  | Osmiidae         |                  |               |                   | INRMA502-12  | Dobosz et al. 2019         |                        |                            |                       |
| COI    | Insecta   | Plecoptera  | Nemouridae       | Amphinemurinae   |               |                   | BOLD:AAL6222 |                            |                        | DeWalt et al. 2020; 33     |                       |
| COI    | Insecta   | Psocodea    | Psocidae         | Psocinae         | Psococerastis |                   | BOLD:ACC5474 |                            |                        | Tsukiji 2020; 34           |                       |
| COI    | Insecta   | Trichoptera | Lepidostomatidae | Lepidostomatinae | Lepidostoma   | elongatum         | RUSST089-12  |                            |                        | Yang & Weaver 2002         | Yang & Weaver 2002    |
| COI    | Insecta   | Trichoptera | Psychomyiidae    | Psychomyiinae    | Tinodes       | higashiyamanus    | BOLD:ACD6706 |                            |                        |                            | Ito 2000, 2017        |
| COI    | Insecta   | Trichoptera | Thremmatidae     | Thremmatinae     | Neophylax     | ussuriensis       | BOLD:AAG9568 |                            |                        |                            | Nozaki 2020           |
| 16S    | Arachnida | Opiliones   | Sclerosomatidae  | Leiobuninae      | Leiobunum     | tohokuense        | NA           |                            |                        |                            | Burns et al. 2018     |
| 16S    | Insecta   | Coleoptera  | Elateridae       | Elaterinae       | Agriotes      |                   | NA           |                            | Oba et al. 2015        | Oba et al. 2015            |                       |
| 16S    | Insecta   | Coleoptera  | Scarabaeidae     | Rutelinae        | Anomala       |                   | NA           |                            |                        | Kobayashi & Matsumoto 2011 |                       |
| 16S    | Insecta   | Coleoptera  | Curculionidae    | Curculioninae    | Curculio      |                   | NA           |                            |                        | Notsu 1994                 |                       |
| 16S    | Insecta   | Coleoptera  | Cerambycidae     | Lamiinae         | Eutetrappa    |                   | NA           |                            |                        | Lin et al. 2017            |                       |
| 16S    | Insecta   | Coleoptera  | Tenebrionidae    | Alleculinae      | Hymenalia     |                   | NA           |                            | Akita & Matsumoto 2012 | Isono et al. 1986          |                       |
| 16S    | Insecta   | Coleoptera  | Scarabaeidae     |                  |               |                   | NA           | Kobayashi & Matsumoto 2011 |                        |                            |                       |
| 16S    | Insecta   | Coleoptera  | Scarabaeidae     |                  |               |                   | NA           | Kobayashi & Matsumoto 2011 |                        |                            |                       |
| 16S    | Insecta   | Coleoptera  | Melandryidae     | Malandryinae     | Phloiotrya    | planiuscula       | NA           |                            |                        | Ishihama & Hara 2006       | Löbl & Smetana 2008   |
| 16S    | Insecta   | Coleoptera  | Scarabaeidae     |                  |               |                   | NA           | Kobayashi & Matsumoto 2011 |                        |                            |                       |
| 16S    | Insecta   | Coleoptera  | Cantharidae      | Cantharinae      | Podabrus      |                   | NA           |                            |                        | Kazantsev 2001             |                       |
| 16S    | Insecta   | Coleoptera  | Chrysomelidae    |                  |               |                   | NA           | Cho & Świętojańska 2017    |                        |                            |                       |
| 16S    | Insecta   | Dermoptera  | Forficulidae     | Anechurinae      | Anechura      | harmandi          | NA           |                            |                        |                            | Nishikawa 2009        |
| 16S    | Insecta   | Dermoptera  | Forficulidae     | Forficulinae     | Forficula     | mikado            | NA           |                            |                        |                            | Nishikawa 2009        |
| 16S    | Insecta   | Diptera     | Mycetophilidae   | Gnoristinae      | Boletina      |                   | NA           |                            |                        | Ratnasingham & Hebert 2007 |                       |
| 16S    | Insecta   | Diptera     | Tachinidae       | Exoristinae      | Botria        | japonica          | NA           |                            |                        |                            | O'Hara et al. 2019    |
| 16S    | Insecta   | Diptera     | Sciaridae        | NA               | Chaetosciara  |                   | NA           | Menzel & Mohrig 2000       | NA                     | Menzel 1999                |                       |
| 16S    | Insecta   | Diptera     | Calliphoridae    | Chrysomyinae     | Chrysomya     |                   | NA           |                            | Iwasa & Hori 1990      | Erzincliglu 1990           |                       |
| 16S    | Insecta   | Diptera     | Empidoidea       |                  |               |                   | NA           | Maeda 2011                 |                        |                            |                       |
| 16S    | Insecta   | Diptera     | Culicidae        | Culicinae        | Culex         |                   | NA           |                            |                        | Fonseca et al. 2009        |                       |
| 16S    | Insecta   | Diptera     | Culicidae        | Culicinae        | Culex         | tritaeniorhynchus | NA           |                            |                        |                            | Takashima et al. 1989 |
| 16S    | Insecta   | Diptera     | Limoniidae       | Limoniinae       | Dicranomyia   |                   | NA           |                            |                        | Savchenko et al. 1992      |                       |
| 16S    | Insecta   | Diptera     | Limoniidae       | Limoniinae       | Dicranomyia   |                   | NA           |                            |                        | Savchenko et al. 1992      |                       |
| 16S    | Insecta   | Diptera     | Limoniidae       | Limoniinae       | Dicranomyia   |                   | NA           |                            |                        | Savchenko et al. 1992      |                       |
| 16S    | Insecta   | Diptera     | Limoniidae       | Limoniinae       | Dicranomyia   |                   | NA           |                            |                        | Savchenko et al. 1992      |                       |
| 16S    | Insecta   | Diptera     | Tachinidae       | Exoristinae      | Eumea         | linearicornis     | NA           |                            |                        |                            | O'Hara et al. 2019    |
| 16S    | Insecta   | Diptera     | Mycetophilidae   | Mycetophilinae   | Exechia       |                   | NA           |                            |                        | Ratnasingham & Hebert 2007 |                       |
| 16S    | Insecta   | Diptera     | Mycetophilidae   | Mycetophilinae   | Exechia       |                   | NA           |                            |                        | Ratnasingham & Hebert 2007 |                       |

| Primer | Class   | Order         | Family           | Subfamily        | Genus            | Species   | BIN | Family                     | Subfamily                  | Genus                      | Species            |
|--------|---------|---------------|------------------|------------------|------------------|-----------|-----|----------------------------|----------------------------|----------------------------|--------------------|
| 16S    | Insecta | Diptera       | Tachinidae       | Exoristinae      | Gonia            | chinensis | NA  |                            |                            |                            | O'Hara et al. 2019 |
| 16S    | Insecta | Diptera       | Limoniidae       |                  |                  |           | NA  | Savchenko et al. 1992      |                            |                            |                    |
| 16S    | Insecta | Diptera       | Chironomidae     | Chironominae     | Micropsectra     |           | NA  |                            |                            | Ratnasingham & Hebert 2007 |                    |
| 16S    | Insecta | Diptera       | Chironomidae     | Chironominae     | Micropsectra     |           | NA  |                            |                            | Ratnasingham & Hebert 2007 |                    |
| 16S    | Insecta | Diptera       | Mycetophilidae   | Mycetophilinae   | Mycetophila      |           | NA  |                            | Ratnasingham & Hebert 2007 | Matsumoto 2006             |                    |
| 16S    | Insecta | Diptera       | Mycetophilidae   | Mycetophilinae   | Mycetophila      | fungorum  | NA  |                            |                            |                            | Okada 1939         |
| 16S    | Insecta | Diptera       | Mycetophilidae   | Mycomyinae       | Mycomya          |           | NA  | Ratnasingham & Hebert 2007 | 笹川 2003                    | 笹川 2003                    |                    |
| 16S    | Insecta | Diptera       |                  |                  |                  |           | NA  |                            |                            |                            |                    |
| 16S    | Insecta | Diptera       | Empidoidea       |                  |                  |           | NA  | Maeda 2011                 |                            |                            |                    |
| 16S    | Insecta | Diptera       | Limoniidae       |                  |                  |           | NA  | Savchenko et al. 1992      |                            |                            |                    |
| 16S    | Insecta | Diptera       | Psychodidae      |                  |                  |           | NA  | Sanjoba et al. 2011        |                            |                            |                    |
| 16S    | Insecta | Diptera       | Rhagionidae      |                  |                  |           | NA  | Imada & Kato 2016          |                            |                            |                    |
| 16S    | Insecta | Diptera       | Tipulidae        |                  |                  |           | NA  | Men et al. 2019            |                            |                            |                    |
| 16S    | Insecta | Diptera       | Culicidae        | Culicinae        | Ochlerotatus     |           | NA  |                            |                            | Ratnasingham & Hebert 2007 |                    |
| 16S    | Insecta | Diptera       | Pediciidae       | Pediciinae       | Pedicia          |           | NA  |                            |                            | Savchenko et al. 1992      |                    |
| 16S    | Insecta | Diptera       | Rhinophoridae    |                  |                  |           | NA  | Kato & Tachi 2016          |                            |                            |                    |
| 16S    | Insecta | Diptera       | Mycetophilidae   | Mycetophilinae   | Pseudobrachypeza |           | NA  |                            |                            | Ratnasingham & Hebert 2007 |                    |
| 16S    | Insecta | Diptera       | Phoridae         | Phorinae         | Stichillus       |           | NA  |                            |                            | Nakayama & Shima 2004      |                    |
| 16S    | Insecta | Diptera       | Tachinidae       | Exoristinae      | Suenomyia        | nudinerva | NA  |                            |                            |                            | O'Hara et al. 2019 |
| 16S    | Insecta | Diptera       | Mycetophilidae   |                  |                  |           | NA  | Ratnasingham & Hebert 2007 |                            |                            |                    |
| 16S    | Insecta | Diptera       | Muscidae         | Azeliinae        | Thricops         |           | NA  |                            |                            | Beppu 2004                 |                    |
| 16S    | Insecta | Diptera       | Tipulidae        | Tipulinae        | Tipula           |           | NA  |                            |                            | Men et al. 2019            |                    |
| 16S    | Insecta | Diptera       | Tipulidae        | Tipulinae        | Tipula           |           | NA  |                            |                            | Men et al. 2019            |                    |
| 16S    | Insecta | Diptera       | Mycetophilidae   | Mycetophilinae   |                  |           | NA  |                            | Ratnasingham & Hebert 2007 |                            |                    |
| 16S    | Insecta | Ephemeroptera | Heptageniidae    | Rhithrogeniinae  | Rhithrogena      |           | NA  |                            |                            | Ishiwata 2001              |                    |
| 16S    | Insecta | Ephemeroptera | Heptageniidae    | Rhithrogeniinae  | Rhithrogena      |           | NA  |                            |                            | Ishiwata 2001              |                    |
| 16S    | Insecta | Hemiptera     | Miridae          | Mirinae          | Adelphocoris     |           | NA  |                            |                            | Zhang et al. 2015          |                    |
| 16S    | Insecta | Hemiptera     | Miridae          | Deraeocorinae    | Alloeotomus      | simplus   | NA  | Zhang et al. 2015          | Poorani et al. 2019        | Seong & Lee 2007           | Seong & Lee 2007   |
| 16S    | Insecta | Hemiptera     | Miridae          | Mirinae          | Arbolygus        | rubripes  | NA  |                            |                            |                            | Tsukiji 2020; 35   |
| 16S    | Insecta | Hemiptera     | Acanthosomatidae | Acanthosomatinae | Elasmucha        | signoreti | NA  |                            |                            |                            | Tsukiji 2020; 36   |
| 16S    | Insecta | Hemiptera     | Miridae          | Mirinae          | Phytocoris       |           | NA  |                            |                            | Yasunaga & Schwartz 2015   |                    |
| 16S    | Insecta | Hemiptera     | Psyllidae        | Psyllinae        | Psylla           |           | NA  |                            |                            | Cho et al. 2019            |                    |
| 16S    | Insecta | Hemiptera     | Psyllidae        | Psyllinae        | Psylla           |           | NA  |                            |                            | Cho et al. 2019            |                    |
| 16S    | Insecta | Hemiptera     | Aphididae        | Calaphidinae     | Symydobius       | kabae     | NA  |                            | Simbaqueba et al. 2016     | Tsukiji 2020; 37           | Qiao & Zhang 2002  |
| 16S    | Insecta | Hymenoptera   | Braconidae       | Rogadinae        | Aleiodes         |           | NA  | Ratnasingham & Hebert 2007 | Butcher et al. 2016        | Samin et al. 2016          |                    |
| 16S    | Insecta | Hymenoptera   | Ichneumonidae    | Campopleginae    | Hyposoter        |           | NA  |                            | Watanabe 2019              | Watanabe 2015              |                    |
| 16S    | Insecta | Hymenoptera   | Braconidae       | Microgastrinae   | Micropplitis     |           | NA  |                            |                            | Kaneko 1993                |                    |
| 16S    | Insecta | Hymenoptera   |                  |                  |                  |           | NA  |                            |                            |                            |                    |

| Primer | Class   | Order       | Family           | Subfamily       | Genus         | Species        | BIN | Family                                | Subfamily                             | Genus                               | Species                 |
|--------|---------|-------------|------------------|-----------------|---------------|----------------|-----|---------------------------------------|---------------------------------------|-------------------------------------|-------------------------|
| 16S    | Insecta | Hymenoptera | Formicidae       |                 |               |                | NA  | 寺山 et al. 2020                        |                                       |                                     |                         |
| 16S    | Insecta | Hymenoptera | Tenthredinidae   | Nematinae       | Nematinus     | luteus         | NA  |                                       |                                       |                                     | Togashi 2007            |
| 16S    | Insecta | Lepidoptera | Geometridae      | Ennominae       | Arichanna     | melanaria      | NA  |                                       |                                       |                                     | ЛЕЛЕЙ et al. 2016       |
| 16S    | Insecta | Lepidoptera | Noctuidae        |                 |               |                | NA  | ЛЕЛЕЙ et al. 2016, Sayama et al. 2012 |                                       |                                     |                         |
| 16S    | Insecta | Lepidoptera | Tortricidae      | Tortricinae     |               |                | NA  |                                       | Sayama et al. 2012, ЛЕЛЕЙ et al. 2016 |                                     |                         |
| 16S    | Insecta | Trichoptera | Limnephilidae    | Dicosmoecinae   | Dicosmoecus   |                | NA  |                                       |                                       | Ratnasingham & Hebert 2007          |                         |
| 16S    | Insecta | Lepidoptera | Geometridae      | Ennominae       | Ectropis      | obliqua        | NA  |                                       |                                       |                                     | ЛЕЛЕЙ et al. 2016       |
| 16S    | Insecta | Lepidoptera | Tortricidae      | Tortricinae     |               |                | NA  |                                       | Sayama et al. 2012, ЛЕЛЕЙ et al. 2016 |                                     |                         |
| 16S    | Insecta | Lepidoptera | Geometridae      | Ennominae       | Jankowskia    |                | NA  |                                       |                                       | ЛЕЛЕЙ et al. 2016                   |                         |
| 16S    | Insecta | Lepidoptera | Geometridae      | Larentiinae     | Lobogonodes   | erectaria      | NA  |                                       |                                       |                                     | Sayama et al. 2012      |
| 16S    | Insecta | Lepidoptera | Erebidae         | Lymantriinae    | Lymantria     |                | NA  |                                       |                                       | ЛЕЛЕЙ et al. 2016                   |                         |
| 16S    | Insecta | Lepidoptera | Geometridae      | Ennominae       | Myrioblephara | cilicornaria   | NA  |                                       |                                       |                                     | Niwaka & Jimbo 2018; 38 |
| 16S    | Insecta | Lepidoptera | Noctuidae        | Noctuinae       | Panolis       |                | NA  |                                       |                                       | ЛЕЛЕЙ et al. 2016                   |                         |
| 16S    | Insecta | Lepidoptera | Noctuidae        | Hadeninae       | Panolis       |                | NA  |                                       |                                       | ЛЕЛЕЙ et al. 2016                   |                         |
| 16S    | Insecta | Lepidoptera | Noctuidae        | Noctuinae       | Panolis       |                | NA  |                                       |                                       | ЛЕЛЕЙ et al. 2016                   |                         |
| 16S    | Insecta | Lepidoptera | Noctuidae        |                 |               |                | NA  | ЛЕЛЕЙ et al. 2016, Sayama et al. 2012 |                                       |                                     |                         |
| 16S    | Insecta | Lepidoptera | Noctuidae        |                 |               |                | NA  | ЛЕЛЕЙ et al. 2016, Sayama et al. 2012 |                                       |                                     |                         |
| 16S    | Insecta | Lepidoptera | Thyrididae       | Siculodinae     | Pyrinioides   | aurea          | NA  |                                       |                                       |                                     | Niwaka & Jimbo 2018; 39 |
| 16S    | Insecta | Lepidoptera | Saturniidae      | Saturniinae     | Saturnia      |                | NA  |                                       |                                       | Sayama et al. 2012                  |                         |
| 16S    | Insecta | Mecoptera   | Panorpidae       | Panorpiniae     | Panorpa       | takenouchii    | NA  |                                       |                                       | 中田 et al. 2006                      | Penny & Byers 1979      |
| 16S    | Insecta | Neuroptera  | Chrysopidae      | Chrysopinae     | Apertochrysa  |                | NA  |                                       |                                       | Tsukaguchi & Tago 2018              |                         |
| 16S    | Insecta | Neuroptera  | Chrysopidae      | Chrysopinae     | Chrysoperla   |                | NA  |                                       |                                       | Tsukiji 2020; 40                    |                         |
| 16S    | Insecta | Neuroptera  | Chrysopidae      | Chrysopinae     | Chrysoperla   |                | NA  |                                       |                                       | Tsukiji 2020; 41                    |                         |
| 16S    | Insecta | Neuroptera  | Osmylidae        | Osmylinae       | Osmylus       |                | NA  |                                       |                                       | Tsukiji 2020; 42                    |                         |
| 16S    | Insecta | Neuroptera  | Hemerobiidae     | Hemerobiinae    |               |                | NA  |                                       | Dobosz et al. 2019                    |                                     |                         |
| 16S    | Insecta | Odonata     | Libellulidae     | Sympetrinae     | Sympetrum     | frequens       | NA  |                                       |                                       |                                     | Tsukiji 2020; 43        |
| 16S    | Insecta | Odonata     | Libellulidae     | Sympetrinae     | Sympetrum     | infuscatum     | NA  |                                       |                                       |                                     | Tsukiji 2020; 44        |
| 16S    | Insecta | Orthoptera  | Rhaphidophoridae | Aemodogrillinae |               |                | NA  |                                       |                                       | Tsukiji 2020; 45                    |                         |
| 16S    | Insecta | Orthoptera  | Trigonidiidae    | Nemobiinae      | Dianemobius   | nigrofasciatus | NA  |                                       |                                       |                                     | Tsukiji 2020; 46        |
| 16S    | Insecta | Orthoptera  | Rhaphidophoridae | Aemodogrillinae | Diestrammena  |                | NA  |                                       |                                       |                                     | Tsukiji 2020; 47        |
| 16S    | Insecta | Orthoptera  | Rhaphidophoridae |                 |               |                | NA  | Tsukiji 2020; 48                      |                                       |                                     |                         |
| 16S    | Insecta | Orthoptera  | Rhaphidophoridae |                 |               |                | NA  | Tsukiji 2020; 49                      |                                       |                                     |                         |
| 16S    | Insecta | Plecoptera  | Perlidae         | Acroneuriinae   | Calineuria    |                | NA  |                                       |                                       | Uchida 1983; DeWalt et al. 2020; 50 |                         |
| 16S    | Insecta | Plecoptera  | Nemouridae       |                 |               |                | NA  | DeWalt et al. 2020; 51                |                                       |                                     |                         |

| Primer | Class   | Order        | Family        | Subfamily     | Genus            | Species      | BIN | Family | Subfamily | Genus               | Species        |
|--------|---------|--------------|---------------|---------------|------------------|--------------|-----|--------|-----------|---------------------|----------------|
| 16S    | Insecta | Psocodea     | Amphipsocidae | Amphipsocinae | Amphipsocus      | japonicus    | NA  |        |           |                     | Yoshizawa 2001 |
| 16S    | Insecta | Psocodea     |               |               |                  |              | NA  |        |           |                     |                |
| 16S    | Insecta | Psocodea     | Mesopsocidae  | NA            | Mesopsocus       | unipunctatus | NA  |        |           |                     | Yoshizawa 1998 |
| 16S    | Insecta | Psocodea     | Psocidae      | Psocinae      | Psococerastis    |              | NA  |        |           | Tsukiji 2020; 52    |                |
| 16S    | Insecta | Psocodea     | Psocidae      | Psocinae      | Psococerastis    | nubila       | NA  |        |           |                     | Yoshizawa 2002 |
| 16S    | Insecta | Psocodea     | Stenopsocidae | NA            | Stenopsocus      | nigricellus  | NA  |        |           | Tsukiji 2020; 53    | Yoshizawa 2002 |
| 16S    | Insecta | Psocodea     | Psocidae      | Psocinae      | Trichadenotecnum |              | NA  |        |           | Yoshizawa 2004      |                |
| 16S    | Insecta | Psocodea     | Psocidae      | Psocinae      | Trichadenotecnum | incognitum   | NA  |        |           | Yoshizawa 2004      | Yoshizawa 2004 |
| 16S    | Insecta | Psocodea     | Psocidae      | Psocinae      | Trichadenotecnum |              | NA  |        |           | Yoshizawa 2004      |                |
| 16S    | Insecta | Thysanoptera | Thripidae     | Thripinae     | Thrips           |              | NA  |        |           | Iwasaki et al. 2005 |                |

#### Homepage links

|                                                                                                                                                                                               | Accessed |
|-----------------------------------------------------------------------------------------------------------------------------------------------------------------------------------------------|----------|
| 1 <a href="http://cockroach.speciesfile.org/Common/basic/Taxa.aspx?TaxonNameID=1175933">http://cockroach.speciesfile.org/Common/basic/Taxa.aspx?TaxonNameID=1175933</a>                       | 23-06-20 |
| 2 <a href="http://www.catalogueoflife.org/col/details/species/id/4fa0e6dd77a4885e51e61d52aeecedac">http://www.catalogueoflife.org/col/details/species/id/4fa0e6dd77a4885e51e61d52aeecedac</a> |          |
| 3 <a href="http://www.jpmoth.org/Coleophoridae/Coleophora_albicans.html">http://www.jpmoth.org/Coleophoridae/Coleophora_albicans.html</a>                                                     | 27-04-20 |
| 4 <a href="http://www.jpmoth.org/Crambidae/Scopariinae/Eudonia_persimilis.html">http://www.jpmoth.org/Crambidae/Scopariinae/Eudonia_persimilis.html</a>                                       | 27-04-20 |
| 5 <a href="http://www.jpmoth.org/Crambidae/Pyraustinae/Pleuroptya_expictalis.html">http://www.jpmoth.org/Crambidae/Pyraustinae/Pleuroptya_expictalis.html</a>                                 | 27-04-20 |
| 6 <a href="http://www.jpmoth.org/Elachistidae/Perittia_andoi.html">http://www.jpmoth.org/Elachistidae/Perittia_andoi.html</a>                                                                 | 27-04-20 |
| 7 <a href="http://www.jpmoth.org/Lasiocampidae/Poecilocampinae/Poecilocampa_tamanukii.html">http://www.jpmoth.org/Lasiocampidae/Poecilocampinae/Poecilocampa_tamanukii.html</a>               | 27-04-20 |
| 8 <a href="http://www.jpmoth.org/Stathmopodidae/Stathmopoda_pedella.html">http://www.jpmoth.org/Stathmopodidae/Stathmopoda_pedella.html</a>                                                   | 27-04-20 |
| 9 <a href="http://www.jpmoth.org/Blastobasidae/Hypatopa_montivaga.html">http://www.jpmoth.org/Blastobasidae/Hypatopa_montivaga.html</a>                                                       | 27-04-20 |
| 10 <a href="http://www.jpmoth.org/Coleophoridae/Coleophora_albicans.html">http://www.jpmoth.org/Coleophoridae/Coleophora_albicans.html</a>                                                    | 27-04-20 |
| 11 <a href="http://www.jpmoth.org/Crambidae/Pyraustinae/Pyrausta_aurata.html">http://www.jpmoth.org/Crambidae/Pyraustinae/Pyrausta_aurata.html</a>                                            | 27-04-20 |
| 12 <a href="http://www.jpmoth.org/Crambidae/Pyraustinae/Pleuroptya_ruralis.html">http://www.jpmoth.org/Crambidae/Pyraustinae/Pleuroptya_ruralis.html</a>                                      | 27-04-20 |
| 13 <a href="http://www.jpmoth.org/Noctuidae/Catocalinae/Ercheia_umbrosa.html">http://www.jpmoth.org/Noctuidae/Catocalinae/Ercheia_umbrosa.html</a>                                            | 27-04-20 |
| 14 & 15 <a href="http://www.jpmoth.org/Hepialidae/index.html">http://www.jpmoth.org/Hepialidae/index.html</a>                                                                                 | 27-04-20 |
| 16 & 17 <a href="https://mushinavi.com/">https://mushinavi.com/</a>                                                                                                                           | 12-05-20 |
| 18 <a href="http://www.jpmoth.org/Lasiocampidae/Lasiocampinae/Euthrix.html">Euthrix potatoria bergmanihttp://www.jpmoth.org/Lasiocampidae/Lasiocampinae/Euthrix.html</a>                      | 27-04-20 |
| 19 <a href="http://www.jpmoth.org/Lecithoceridae/Oditinae/Scythropiodes_issikii.html">http://www.jpmoth.org/Lecithoceridae/Oditinae/Scythropiodes_issikii.html</a>                            | 27-04-20 |
| 20 <a href="http://www.jpmoth.org/Limacodidae/Limacodinae/Phrixolepia_sericea.html">http://www.jpmoth.org/Limacodidae/Limacodinae/Phrixolepia_sericea.html</a>                                | 27-04-20 |
| 21 <a href="http://www.jpmoth.org/Noctuidae/Noctuinae/Diarsia_canescens.html">http://www.jpmoth.org/Noctuidae/Noctuinae/Diarsia_canescens.html</a>                                            | 27-04-20 |
| 22 <a href="https://mushinavi.com/">https://mushinavi.com/</a>                                                                                                                                | 15-05-20 |
| 23 <a href="http://www.jpmoth.org/Pyralidae/Pyralinae/Endotricha_olivacealis.html">http://www.jpmoth.org/Pyralidae/Pyralinae/Endotricha_olivacealis.html</a>                                  | 27-04-20 |
| 24 <a href="http://www.jpmoth.org/Sphingidae/Macroglossinae/Hemaris_affinis.html">http://www.jpmoth.org/Sphingidae/Macroglossinae/Hemaris_affinis.html</a>                                    | 27-04-20 |
| 25 <a href="http://www.jpmoth.org/Sphingidae/Sphinginae/Sphinx_morio_inouei.html">Sphinx morio inoueihttp://www.jpmoth.org/Sphingidae/Sphinginae/Sphinx_morio_inouei.html</a>                 | 27-04-20 |
| 26 <a href="http://www.jpmoth.org/Stathmopodidae/Stathmopoda_pedella.html">http://www.jpmoth.org/Stathmopodidae/Stathmopoda_pedella.html</a>                                                  | 27-04-20 |
| 27 <a href="http://www.jpmoth.org/Tortricidae/Tortricinae/Eana_incanana.html">http://www.jpmoth.org/Tortricidae/Tortricinae/Eana_incanana.html</a>                                            | 27-04-20 |
| 28 <a href="http://www.jpmoth.org/Tortricidae/Olethreutinae/Olethreutes_bipunctanus_yama.html">http://www.jpmoth.org/Tortricidae/Olethreutinae/Olethreutes_bipunctanus_yama.html</a>          | 15-05-20 |

| <b>Homepage links</b>                                                                                                                                                                                                                | <b>Accessed</b>       |
|--------------------------------------------------------------------------------------------------------------------------------------------------------------------------------------------------------------------------------------|-----------------------|
| 29 <a href="https://mushinavi.com/">https://mushinavi.com/</a>                                                                                                                                                                       | 12-05-20              |
| 30 <a href="http://www.jpmoth.org/Tortricidae/Olethreutinae/Bactra_furfurana.html">http://www.jpmoth.org/Tortricidae/Olethreutinae/Bactra_furfurana.html</a>                                                                         | 27-04-20              |
| 31 & 32 <a href="https://mushinavi.com/">https://mushinavi.com/</a>                                                                                                                                                                  | 08-05-20              |
| 33 <a href="http://plecoptera.speciesfile.org">http://plecoptera.speciesfile.org</a>                                                                                                                                                 | 08-05-20              |
| 34 <a href="https://mushinavi.com/">https://mushinavi.com/</a>                                                                                                                                                                       | 08-05-20              |
| 35-37 <a href="https://mushinavi.com/">https://mushinavi.com/</a>                                                                                                                                                                    | 07-05-20              |
| 38 <a href="http://www.jpmoth.org/Geometridae/Ennominae/Myrioblephara_cilicornaria.html">http://www.jpmoth.org/Geometridae/Ennominae/Myrioblephara_cilicornaria.html</a>                                                             | 27-04-20              |
| 39 <a href="http://www.jpmoth.org/Thyrididae/Siculodinae/Pyriinioides_aurea.html">http://www.jpmoth.org/Thyrididae/Siculodinae/Pyriinioides_aurea.html</a>                                                                           | 27-04-20              |
| 40-49 <a href="https://mushinavi.com/">https://mushinavi.com/</a>                                                                                                                                                                    | 08-05-20              |
| 50 <a href="http://plecoptera.speciesfile.org/Common/editTaxon/Distribution/ShowDistribution.aspx?TaxonNameID=1157210">http://plecoptera.speciesfile.org/Common/editTaxon/Distribution/ShowDistribution.aspx?TaxonNameID=1157210</a> | 08-05-20              |
| 51 <a href="http://plecoptera.speciesfile.org">http://plecoptera.speciesfile.org</a>                                                                                                                                                 | 08-05-20              |
| 52 & 53 <a href="https://mushinavi.com/">https://mushinavi.com/</a>                                                                                                                                                                  | 08-05-20              |
| <a href="https://www.boldsystems.org/">https://www.boldsystems.org/</a> (cited above as Ratnasingham & Hebert 2007)                                                                                                                  | 27-04-20 - 07-05-2020 |
