# Supplementary material for: Dietary analysis reveals differences in the prey use of two sympatric bat species
Source: PubMed Central journal article supplement (PMC8717349; doi:10.1002/ece3.8472), 2021-12-16
Supplement: ECE3-11-18651-s005.pdf [file ECE3-11-18651-s005.pdf]

## Supplementary information S2 for *Dietary analysis reveals differences in the prey use of two sympatric bat species*

Olga Heim<sup>1</sup>, Anna I.E. Puisto<sup>2</sup>, Ilari Sääksjärvi<sup>3</sup>, Dai Fukui<sup>4</sup> and Eero J. Vesterinen<sup>5\*</sup>

<sup>1</sup> Faculty of Life and Medical Sciences, Doshisha University, 610-0321 Kyotanabe, Japan

<sup>2</sup> Centre for Population Health Research, University of Turku, 20014 Turku, Finland

<sup>3</sup> Biodiversity Unit, University of Turku, 20014 Turku, Finland

<sup>4</sup> The University of Tokyo Hokkaido Forest, The University of Tokyo, 079-1563 Furano, Japan

<sup>5</sup> Department of Biology, University of Turku, 20014 Turku, Finland

### Percentage of occurrence data

| 16S                |                   |             |  |
|--------------------|-------------------|-------------|--|
| Murina ussuriensis | Myotis ikonnikovi |             |  |
|                    |                   | Count of    |  |
| 54                 | 76                | occurrences |  |
|                    |                   | Sum of      |  |
| 88                 | 140               | occurrences |  |
|                    |                   | number of   |  |
| 43                 | 39                | samples     |  |

| COI                |                   |                      |
|--------------------|-------------------|----------------------|
| Murina ussuriensis | Myotis ikonnikovi |                      |
|                    |                   | Count of occurrences |
| 180                | 264               |                      |
|                    |                   | Sum of occurrences   |
| 234                | 474               |                      |
|                    |                   | Number of samples    |
| 49                 | 45                |                      |

| Fusion             |                   |             |
|--------------------|-------------------|-------------|
| Murina ussuriensis | Myotis ikonnikovi |             |
|                    |                   | Count of    |
| 234                | 340               | occurrences |
|                    |                   | Sum of      |
| 322                | 614               | occurrences |
|                    |                   | number of   |
| 53                 | 45                | samples     |

| Primer | Class      | Order       | Family          | Subfamily     | Genus             | Species          | BIN          | Percentage of occurrence |               | Number of samples where prey item occurred |               |
|--------|------------|-------------|-----------------|---------------|-------------------|------------------|--------------|--------------------------|---------------|--------------------------------------------|---------------|
|        |            |             |                 |               |                   |                  |              | M. ussuriensis           | M. ikonnikovi | M. ussuriensis                             | M. ikonnikovi |
| COI    | Arachnida  | Araneae     | Lycosidae       | NA            | Pardosa           |                  | BOLD:ABA5238 | 0.009                    | 0             | 3                                          | 0             |
| COI    | Arachnida  | Araneae     | Salticidae      |               |                   |                  | BOLD:AAV1597 | 0.003                    | 0             | 1                                          | 0             |
| COI    | Arachnida  | Araneae     | Salticidae      |               |                   |                  | GBCH10991-13 | 0.003                    | 0             | 1                                          | 0             |
| COI    | Arachnida  | Araneae     | Salticidae      |               |                   |                  | BOLD:ACH5240 | 0.003                    | 0             | 1                                          | 0             |
| COI    | Collembola | Symphyleona | Bourletiellidae | NA            | Deuterosminthurus |                  | BOLD:AAB7915 | 0.003                    | 0             | 1                                          | 0             |
| COI    | Insecta    | Blattodea   | Ectobiidae      | Ectobiinae    |                   |                  | BOLD:ACI8100 | 0.003                    | 0             | 1                                          | 0             |
| COI    | Insecta    | Coleoptera  | Carabidae       |               |                   |                  | BOLD:AAZ4621 | 0.006                    | 0             | 2                                          | 0             |
| COI    | Insecta    | Coleoptera  | Coccinellidae   |               |                   |                  | BOLD:ACP4109 | 0                        | 0.0016        | 0                                          | 1             |
| COI    | Insecta    | Coleoptera  | Cantharidae     | Cantharinae   | Podabrus          |                  | BOLD:ACD6222 | 0                        | 0.0049        | 0                                          | 3             |
| COI    | Insecta    | Coleoptera  | Cantharidae     | Cantharinae   | Podabrus          |                  | BOLD:ACD6257 | 0                        | 0.0016        | 0                                          | 1             |
| COI    | Insecta    | Coleoptera  | Carabidae       | Harpalinae    |                   |                  | BOLD:ABX4019 | 0.003                    | 0.0016        | 1                                          | 1             |
| COI    | Insecta    | Coleoptera  | Carabidae       | Carabinae     | Carabus           |                  | BOLD:ABY6003 | 0                        | 0.0016        | 0                                          | 1             |
| COI    | Insecta    | Coleoptera  | Carabidae       | Harpalinae    | Pterostichus      | oblongopunctatus | BOLD:ABY4764 | 0.003                    | 0             | 1                                          | 0             |
| COI    | Insecta    | Coleoptera  | Cerambycidae    | Lamiinae      | Monochamus        |                  | BOLD:AAC3388 | 0.003                    | 0             | 1                                          | 0             |
| COI    | Insecta    | Coleoptera  | Chrysomelidae   | Chrysomelinae |                   |                  | BOLD:AAC0432 | 0.006                    | 0.0016        | 2                                          | 1             |
| COI    | Insecta    | Coleoptera  | Cryptophagidae  | Atomariinae   | Atomaria          | turgida          | BOLD:AAJ9463 | 0                        | 0.0016        | 0                                          | 1             |
| COI    | Insecta    | Coleoptera  | Curculionidae   | Entiminae     | Polydrusus        |                  | BOLD:ACO8630 | 0                        | 0.0016        | 0                                          | 1             |
| COI    | Insecta    | Coleoptera  | Hydrophilidae   | Hydrophilinae | Enochrus          |                  | BOLD:AAF0204 | 0.003                    | 0             | 1                                          | 0             |

| Primer | Class   | Order      | Family         | Subfamily     | Genus          | Species    | BIN          | M. ussuriensis | M. ikonnikovi | M. ussuriensis | M. ikonnikovi |
|--------|---------|------------|----------------|---------------|----------------|------------|--------------|----------------|---------------|----------------|---------------|
| COI    | Insecta | Coleoptera | Nitidulidae    | Nitidulinae   | Cychramus      | variegatus | BOLD:ABW4745 | 0              | 0.0033        | 0              | 2             |
| COI    | Insecta | Coleoptera | Staphylinidae  | Euaesthetinae | Euaesthetus    |            | BOLD:ACG9244 | 0              | 0.0016        | 0              | 1             |
| COI    | Insecta | Diptera    | Anthomyiidae   |               |                |            | BOLD:AAG2490 | 0              | 0.0016        | 0              | 1             |
| COI    | Insecta | Diptera    | Tachinidae     | Exoristinae   |                |            | BOLD:AAI6325 | 0.003          | 0             | 1              | 0             |
| COI    | Insecta | Diptera    | Tipulidae      | Tipulinae     | Tipula         |            | BOLD:AAN5045 | 0              | 0.0016        | 0              | 1             |
| COI    | Insecta | Diptera    | Tipulidae      | Tipulinae     | Tipula         |            | BOLD:AAN9029 | 0.003          | 0.0033        | 1              | 2             |
| COI    | Insecta | Diptera    | Limoniidae     | Chioneinae    | Teucholabis    |            | BOLD:AAV2508 | 0              | 0.0016        | 0              | 1             |
| COI    | Insecta | Diptera    | Limoniidae     | Chioneinae    |                |            | BOLD:ABA4102 | 0              | 0.0016        | 0              | 1             |
| COI    | Insecta | Diptera    | Cecidomyiidae  |               |                |            | BOLD:ABV2094 | 0.003          | 0             | 1              | 0             |
| COI    | Insecta | Diptera    | Limoniidae     |               |                |            | BOLD:ABX4369 | 0              | 0.0016        | 0              | 1             |
| COI    | Insecta | Diptera    | Limoniidae     | Limoniinae    | Libnotes       |            | BOLD:ABY2385 | 0              | 0.0033        | 0              | 2             |
| COI    | Insecta | Diptera    | Syrphidae      | Eristalinae   |                |            | BOLD:ABY2389 | 0              | 0.0016        | 0              | 1             |
| COI    | Insecta | Diptera    | Tipulidae      | Tipulinae     | Tipula         |            | BOLD:ABY5691 | 0.003          | 0             | 1              | 0             |
| COI    | Insecta | Diptera    | Phoridae       |               |                |            | BOLD:ACA3150 | 0.003          | 0             | 1              | 0             |
| COI    | Insecta | Diptera    | Tachinidae     | Tachininae    | Nemoraea       | takanoi    | BOLD:ACA7375 | 0.003          | 0             | 1              | 0             |
| COI    | Insecta | Diptera    | Chironomidae   | Chironominae  | Glyptotendipes |            | BOLD:ACE3296 | 0              | 0.0016        | 0              | 1             |
| COI    | Insecta | Diptera    | Tachinidae     |               |                |            | BOLD:ACF0578 | 0.003          | 0             | 1              | 0             |
| COI    | Insecta | Diptera    | Tipulidae      | Tipulinae     | Tipula         |            | BOLD:ACF0878 | 0              | 0.0016        | 0              | 1             |
| COI    | Insecta | Diptera    | Phoridae       |               |                |            | BOLD:ACF6080 | 0.012          | 0.0049        | 4              | 3             |
| COI    | Insecta | Diptera    | Sphaeroceridae | Limosininae   | Rachispoda     |            | BOLD:ACK2192 | 0              | 0.0016        | 0              | 1             |
| COI    | Insecta | Diptera    | Chironomidae   |               |                |            | BOLD:ACK8680 | 0              | 0.0016        | 0              | 1             |
| COI    | Insecta | Diptera    | Sciaridae      |               |                |            | BOLD:ACM6077 | 0              | 0.0016        | 0              | 1             |
| COI    | Insecta | Diptera    | Simuliidae     |               |                |            | BOLD:ACM8222 | 0              | 0.0016        | 0              | 1             |
| COI    | Insecta | Diptera    | Limoniidae     |               |                |            | BOLD:ACN0178 | 0              | 0.0016        | 0              | 1             |
| COI    | Insecta | Diptera    | Limoniidae     |               |                |            | BOLD:ACN0238 | 0              | 0.0016        | 0              | 1             |
| COI    | Insecta | Diptera    | Mycetophilidae |               |                |            | BOLD:ACN0859 | 0              | 0.0049        | 0              | 3             |
| COI    | Insecta | Diptera    | Calliphoridae  |               |                |            | BOLD:ACN1515 | 0.003          | 0             | 1              | 0             |
| COI    | Insecta | Diptera    | Psychodidae    |               |                |            | BOLD:ACN3276 | 0              | 0.0016        | 0              | 1             |
| COI    | Insecta | Diptera    | Drosophilidae  |               |                |            | BOLD:ACN4805 | 0              | 0.0016        | 0              | 1             |
| COI    | Insecta | Diptera    |                |               |                |            | BOLD:ACN5240 | 0              | 0.0016        | 0              | 1             |
| COI    | Insecta | Diptera    | Limoniidae     |               |                |            | BOLD:ACN5325 | 0              | 0.0033        | 0              | 2             |
| COI    | Insecta | Diptera    | Phoridae       |               |                |            | BOLD:ACO0272 | 0.006          | 0             | 2              | 0             |
| COI    | Insecta | Diptera    | Chironomidae   |               |                |            | BOLD:ACO4488 | 0              | 0.0016        | 0              | 1             |
| COI    | Insecta | Diptera    |                |               |                |            | BOLD:ACP6542 | 0              | 0.0033        | 0              | 2             |
| COI    | Insecta | Diptera    | Chloropidae    |               |                |            | BOLD:ACR0489 | 0              | 0.0016        | 0              | 1             |
| COI    | Insecta | Diptera    | Muscidae       |               |                |            | BOLD:ACT7328 | 0              | 0.0016        | 0              | 1             |
| COI    | Insecta | Diptera    | Sciaridae      |               |                |            | BOLD:ACU8386 | 0              | 0.0016        | 0              | 1             |
| COI    | Insecta | Diptera    | Muscidae       | Phaoniinae    | Helina         |            | BOLD:ACV2533 | 0              | 0.0016        | 0              | 1             |

| Primer | Class   | Order   | Family          | Subfamily       | Genus               | Species    | BIN          | M. ussuriensis | M. ikonnikovi | M. ussuriensis | M. ikonnikovi |
|--------|---------|---------|-----------------|-----------------|---------------------|------------|--------------|----------------|---------------|----------------|---------------|
| COI    | Insecta | Diptera | Psychodidae     |                 |                     |            | BOLD:ACW2931 | 0              | 0.0016        | 0              | 1             |
| COI    | Insecta | Diptera | Agromyzidae     |                 |                     |            | BOLD:AAV4874 | 0              | 0.0016        | 0              | 1             |
| COI    | Insecta | Diptera | Anthomyiidae    | Anthomyiinae    | Botanophila         |            | BOLD:AAG2502 | 0              | 0.0016        | 0              | 1             |
| COI    | Insecta | Diptera | Anthomyiidae    | Anthomyiinae    | Lasiomma            |            | BOLD:ACK1581 | 0.003          | 0             | 1              | 0             |
| COI    | Insecta | Diptera | Anthomyiidae    | Anthomyiinae    | Delia               | platura    | BOLD:AAG2511 | 0.003          | 0             | 1              | 0             |
| COI    | Insecta | Diptera | Anthomyiidae    | Anthomyiinae    | Botanophila         | profuga    | BOLD:ACP6334 | 0.003          | 0.0033        | 1              | 2             |
| COI    | Insecta | Diptera | Bolitophilidae  | NA              | Bolitophila         |            | BOLD:AAM9007 | 0              | 0.0016        | 0              | 1             |
| COI    | Insecta | Diptera | Cecidomyiidae   |                 |                     |            | BOLD:ACP9491 | 0.006          | 0             | 2              | 0             |
| COI    | Insecta | Diptera | Cecidomyiidae   |                 |                     |            | BOLD:ACU9836 | 0              | 0.0033        | 0              | 2             |
| COI    | Insecta | Diptera | Cecidomyiidae   | Cecidomyiinae   | Feltiella           | acarisuga  | BOLD:ACD4136 | 0.003          | 0             | 1              | 0             |
| COI    | Insecta | Diptera | Chamaemyiidae   |                 |                     |            | BOLD:ACC5885 | 0              | 0.0016        | 0              | 1             |
| COI    | Insecta | Diptera | Chironomidae    | Diamesinae      | Diamesa             |            | BOLD:AAB5106 | 0              | 0.0016        | 0              | 1             |
| COI    | Insecta | Diptera | Chironomidae    | Orthoclaadiinae | Heterotrissocladius | marcidus   | BOLD:AAF2163 | 0              | 0.0016        | 0              | 1             |
| COI    | Insecta | Diptera | Chironomidae    | Orthoclaadiinae | Eukiefferiella      |            | BOLD:AAI5126 | 0.003          | 0             | 1              | 0             |
| COI    | Insecta | Diptera |                 |                 |                     |            | BOLD:ACQ9269 | 0              | 0.0016        | 0              | 1             |
| COI    | Insecta | Diptera | Chironomidae    | Orthoclaadiinae | Cricotopus          | bicinctus  | BOLD:AAT9677 | 0.003          | 0             | 1              | 0             |
| COI    | Insecta | Diptera | Chironomidae    |                 |                     |            | BOLD:ACB8882 | 0              | 0.0016        | 0              | 1             |
| COI    | Insecta | Diptera | Chironomidae    |                 |                     |            | BOLD:ACF6427 | 0.003          | 0             | 1              | 0             |
| COI    | Insecta | Diptera | Chironomidae    | Diamesinae      |                     |            | BOLD:ACK5496 | 0              | 0.0033        | 0              | 2             |
| COI    | Insecta | Diptera | Chloropidae     | Oscinellinae    |                     |            | BOLD:AAN5657 | 0              | 0.0016        | 0              | 1             |
| COI    | Insecta | Diptera | Chloropidae     |                 |                     |            | BOLD:ADC9928 | 0.003          | 0             | 1              | 0             |
| COI    | Insecta | Diptera | Culicidae       | Culicinae       |                     |            | BOLD:AAF2904 | 0.003          | 0.0016        | 1              | 1             |
| COI    | Insecta | Diptera | Culicidae       | Culicinae       | Culex               | orientalis | BOLD:ACB9306 | 0.009          | 0.0212        | 3              | 13            |
| COI    | Insecta | Diptera | Culicidae       | Culicinae       | Culex               |            | BOLD:AAA4751 | 0.003          | 0             | 1              | 0             |
| COI    | Insecta | Diptera | Cylindrotomidae | Cylindrotominae | Cylindrotoma        |            | BOLD:AAD0770 | 0              | 0.0016        | 0              | 1             |
| COI    | Insecta | Diptera | Drosophilidae   | Drosophilinae   | Drosophila          |            | BOLD:AAY0127 | 0              | 0.0016        | 0              | 1             |
| COI    | Insecta | Diptera | Drosophilidae   | Drosophilinae   | Drosophila          |            | BOLD:ADH1432 | 0              | 0.0016        | 0              | 1             |
| COI    | Insecta | Diptera | Drosophilidae   | Steganinae      | Leucophenga         |            | BOLD:ACA1411 | 0              | 0.0016        | 0              | 1             |
| COI    | Insecta | Diptera | Ephydriidae     |                 |                     |            | BOLD:ACS0447 | 0              | 0.0016        | 0              | 1             |
| COI    | Insecta | Diptera | Hybotidae       | Tachydromiinae  | Chersodromia        |            | BOLD:ACJ9160 | 0.003          | 0             | 1              | 0             |
| COI    | Insecta | Diptera | Keroplastidae   |                 |                     |            | BOLD:AAG4943 | 0              | 0.0016        | 0              | 1             |
| COI    | Insecta | Diptera | Limoniidae      | Limoniinae      | Antocha             | bifida     | BOLD:AAW5955 | 0.003          | 0.0114        | 1              | 7             |
| COI    | Insecta | Diptera | Limoniidae      | Limoniinae      | Dicranomyia         | frontalis  | BOLD:ABA5203 | 0              | 0.0033        | 0              | 2             |
| COI    | Insecta | Diptera | Limoniidae      | Limoniinae      | Dicranomyia         |            | BOLD:ABW0212 | 0              | 0.0016        | 0              | 1             |
| COI    | Insecta | Diptera | Limoniidae      |                 |                     |            | BOLD:ABV4791 | 0              | 0.0016        | 0              | 1             |
| COI    | Insecta | Diptera | Limoniidae      |                 |                     |            | BOLD:ACS9407 | 0.006          | 0.0049        | 2              | 3             |
| COI    | Insecta | Diptera | Limoniidae      | Limoniinae      | Discobola           |            | BOLD:ABW4922 | 0              | 0.0016        | 0              | 1             |
| COI    | Insecta | Diptera | Limoniidae      | Limoniinae      | Libnotes            |            | BOLD:ABW9478 | 0              | 0.0016        | 0              | 1             |

| Primer | Class   | Order   | Family          | Subfamily       | Genus        | Species     | BIN          | M. ussuriensis | M. ikonnikovi | M. ussuriensis | M. ikonnikovi |
|--------|---------|---------|-----------------|-----------------|--------------|-------------|--------------|----------------|---------------|----------------|---------------|
| COI    | Insecta | Diptera | Limoniidae      | Limoniinae      | Dicranomyia  |             | BOLD:AAO3939 | 0              | 0.0033        | 0              | 2             |
| COI    | Insecta | Diptera | Limoniidae      | Limoniinae      | Dicranomyia  |             | FINTI487-12  | 0              | 0.0049        | 0              | 3             |
| COI    | Insecta | Diptera | Limoniidae      | Limoniinae      | Metalimnobia |             | BOLD:ABU9381 | 0              | 0.0016        | 0              | 1             |
| COI    | Insecta | Diptera | Limoniidae      | Limoniinae      | Metalimnobia |             | BOLD:AAX5093 | 0              | 0.0016        | 0              | 1             |
| COI    | Insecta | Diptera | Limoniidae      | Limoniinae      | Rhipidia     | maculata    | BOLD:ACB7799 | 0              | 0.0049        | 0              | 3             |
| COI    | Insecta | Diptera | Lonchopteriidae | NA              | Lonchoptera  |             | BOLD:ACB6694 | 0.003          | 0.0016        | 1              | 1             |
| COI    | Insecta | Diptera | Muscidae        |                 |              |             | BOLD:AAG1765 | 0              | 0.0033        | 0              | 2             |
| COI    | Insecta | Diptera | Muscidae        |                 |              |             | BOLD:ACD2056 | 0              | 0.0033        | 0              | 2             |
| COI    | Insecta | Diptera | Muscidae        | Phaoniinae      | Helina       | obscurata   | BOLD:AAE6931 | 0.003          | 0.0016        | 1              | 1             |
| COI    | Insecta | Diptera | Muscidae        | Azeliinae       | Muscina      | pascuorum   | BOLD:AAG1714 | 0              | 0.0016        | 0              | 1             |
| COI    | Insecta | Diptera | Muscidae        |                 |              |             | BOLD:ACR5608 | 0.003          | 0             | 1              | 0             |
| COI    | Insecta | Diptera | Muscidae        |                 |              |             | BOLD:AAX1493 | 0.003          | 0.0016        | 1              | 1             |
| COI    | Insecta | Diptera | Muscidae        | Azeliinae       | Hydrotaea    | armipes     | BOLD:AAG6908 | 0              | 0.0016        | 0              | 1             |
| COI    | Insecta | Diptera | Muscidae        | Phaoniinae      | Phaonia      |             | BOLD:AAG1772 | 0.003          | 0.0033        | 1              | 2             |
| COI    | Insecta | Diptera | Muscidae        | Phaoniinae      | Phaonia      |             | BOLD:AAP8142 | 0.003          | 0             | 1              | 0             |
| COI    | Insecta | Diptera | Muscidae        | Azeliinae       | Hydrotaea    | glabricula  | BOLD:ADK1195 | 0              | 0.0033        | 0              | 2             |
| COI    | Insecta | Diptera | Muscidae        | Azeliinae       | Potamia      | littoralis  | BOLD:ACQ0523 | 0.003          | 0             | 1              | 0             |
| COI    | Insecta | Diptera | Muscidae        | Azeliinae       | Thricops     | diaphanus   | BOLD:AAG1710 | 0              | 0.0016        | 0              | 1             |
| COI    | Insecta | Diptera | Mycetophiliidae | Mycetophiliinae | Platurocypta |             | BOLD:ACC5656 | 0              | 0.0016        | 0              | 1             |
| COI    | Insecta | Diptera | Pediciidae      | Uliinae         | Ula          |             | BOLD:AAV1814 | 0.003          | 0.0033        | 1              | 2             |
| COI    | Insecta | Diptera | Pediciidae      | Pediciinae      | Dicranota    |             | BOLD:ABW5265 | 0              | 0.0016        | 0              | 1             |
| COI    | Insecta | Diptera | Pediciidae      | Uliinae         | Ula          | bolitophila | BOLD:ABU5946 | 0.003          | 0             | 1              | 0             |
| COI    | Insecta | Diptera | Pediciidae      | Uliinae         | Ula          |             | BOLD:ABA7462 | 0.003          | 0             | 1              | 0             |
| COI    | Insecta | Diptera | Periscleridae   |                 |              |             | BOLD:ADE5755 | 0              | 0.0049        | 0              | 3             |
| COI    | Insecta | Diptera | Phoridae        |                 |              |             | BOLD:AAP6413 | 0.003          | 0             | 1              | 0             |
| COI    | Insecta | Diptera | Psychodidae     |                 |              |             | BOLD:ACO7340 | 0              | 0.0016        | 0              | 1             |
| COI    | Insecta | Diptera | Psychodidae     |                 |              |             | BOLD:ADE7332 | 0              | 0.0016        | 0              | 1             |
| COI    | Insecta | Diptera | Psychodidae     |                 |              |             | BOLD:ADE8063 | 0              | 0.0016        | 0              | 1             |
| COI    | Insecta | Diptera | Psychodidae     | Psychodinae     | Psychoda     |             | BOLD:AAL7819 | 0.003          | 0             | 1              | 0             |
| COI    | Insecta | Diptera | Psychodidae     | Psychodinae     | Psychoda     |             | BOLD:ACD9559 | 0              | 0.0016        | 0              | 1             |
| COI    | Insecta | Diptera | Sarcophagidae   |                 |              |             | BOLD:ACU3079 | 0.009          | 0.0033        | 3              | 2             |
| COI    | Insecta | Diptera | Sciaridae       |                 |              |             | BOLD:ACC1760 | 0.003          | 0             | 1              | 0             |
| COI    | Insecta | Diptera | Sciaridae       |                 |              |             | BOLD:ACI7364 | 0              | 0.0049        | 0              | 3             |
| COI    | Insecta | Diptera | Simuliidae      | Simuliinae      | Simulium     |             | BOLD:ABA1846 | 0              | 0.0016        | 0              | 1             |
| COI    | Insecta | Diptera | Sphaeroceridae  | Limosiniinae    | Opalimosina  | mirabilis   | BOLD:AAN6406 | 0              | 0.0049        | 0              | 3             |
| COI    | Insecta | Diptera | Syrphidae       | Eristalinae     | Ferdinandea  | cuprea      | BOLD:AAJ0402 | 0              | 0.0065        | 0              | 4             |
| COI    | Insecta | Diptera | Tachinidae      | Exoristinae     | Cyzenis      |             | BOLD:AAP4829 | 0              | 0.0016        | 0              | 1             |
| COI    | Insecta | Diptera | Tachinidae      | Exoristinae     | Drino        |             | BOLD:AAB6198 | 0.003          | 0             | 1              | 0             |

| Primer | Class   | Order       | Family         | Subfamily       | Genus              | Species     | BIN          | M. ussuriensis | M. ikonnikovi | M. ussuriensis | M. ikonnikovi |
|--------|---------|-------------|----------------|-----------------|--------------------|-------------|--------------|----------------|---------------|----------------|---------------|
| COI    | Insecta | Diptera     | Tachinidae     | Exoristinae     |                    |             | BOLD:AAN9266 | 0.003          | 0             | 1              | 0             |
| COI    | Insecta | Diptera     | Tachinidae     | Exoristinae     | Cadurciella        | tritaeniata | BOLD:AAN9651 | 0.003          | 0             | 1              | 0             |
| COI    | Insecta | Diptera     | Tachinidae     | Exoristinae     | Phebellia          | villica     | BOLD:ACB0760 | 0.003          | 0             | 1              | 0             |
| COI    | Insecta | Diptera     | Tachinidae     |                 |                    |             | BOLD:AAZ8670 | 0.003          | 0             | 1              | 0             |
| COI    | Insecta | Diptera     | Tachinidae     | Exoristinae     |                    |             | BOLD:AAC1692 | 0.003          | 0             | 1              | 0             |
| COI    | Insecta | Diptera     | Tipulidae      | Tipulinae       | Tipula             | kuzuensis   | BOLD:AAN9034 | 0              | 0.0065        | 0              | 4             |
| COI    | Insecta | Diptera     | Tipulidae      | Tipulinae       | Tipula             |             | BOLD:ABV3695 | 0              | 0.0016        | 0              | 1             |
| COI    | Insecta | Diptera     | Tipulidae      | Tipulinae       | Tipula             |             | BOLD:ABV4667 | 0              | 0.0016        | 0              | 1             |
| COI    | Insecta | Diptera     | Tipulidae      | Tipulinae       | Tipula             |             | TIPTW088-10  | 0.003          | 0.0049        | 1              | 3             |
| COI    | Insecta | Diptera     | Tipulidae      |                 |                    |             | TIPTW093-10  | 0.003          | 0.0098        | 1              | 6             |
| COI    | Insecta | Diptera     | Trichoceridae  | Trichocerinae   | Trichocera         |             | BOLD:ACF7745 | 0              | 0.0016        | 0              | 1             |
| COI    | Insecta | Hemiptera   | Pentatomidae   |                 |                    |             | BOLD:AAP3528 | 0.003          | 0             | 1              | 0             |
| COI    | Insecta | Hemiptera   | Cicadellidae   | Deltocephalinae |                    |             | BOLD:AAG8956 | 0              | 0.0016        | 0              | 1             |
| COI    | Insecta | Hemiptera   | Cicadidae      | Cicadinae       | Yezoterpnosia      | nigricosta  | BOLD:ACP9813 | 0.003          | 0             | 1              | 0             |
| COI    | Insecta | Hemiptera   | Psyllidae      |                 |                    |             | BOLD:ACM6872 | 0              | 0.0016        | 0              | 1             |
| COI    | Insecta | Hymenoptera | Cimbicidae     | Cimbicinae      | Trichiosoma        |             | BOLD:ACJ7002 | 0.003          | 0             | 1              | 0             |
| COI    | Insecta | Hymenoptera | Cimbicidae     | Cimbicinae      | Trichiosoma        |             | BOLD:ABZ2163 | 0.003          | 0             | 1              | 0             |
| COI    | Insecta | Hymenoptera | Ichneumonidae  |                 |                    |             | BOLD:ADI1279 | 0              | 0.0016        | 0              | 1             |
| COI    | Insecta | Hymenoptera | Pamphiliidae   | Pamphiliinae    | Neurotoma          | nemoralis   | BOLD:AAV6346 | 0.003          | 0             | 1              | 0             |
| COI    | Insecta | Hymenoptera | Pamphiliidae   | Pamphiliinae    | Pamphilius         |             | BOLD:AAK4614 | 0.003          | 0             | 1              | 0             |
| COI    | Insecta | Hymenoptera |                |                 |                    |             | EII067-15    | 0.003          | 0             | 1              | 0             |
| COI    | Insecta | Hymenoptera |                |                 |                    |             | EII104-15    | 0              | 0.0033        | 0              | 2             |
| COI    | Insecta | Hymenoptera | Tenthredinidae | Nematinae       | Pristiphora        |             | BOLD:AAK9450 | 0.003          | 0             | 1              | 0             |
| COI    | Insecta | Lepidoptera | Coleophoridae  | Coleophorinae   | Coleophora         |             | BOLD:AAC8694 | 0              | 0.0016        | 0              | 1             |
| COI    | Insecta | Lepidoptera | Crambidae      | Scopariinae     | Eudonia            | persimilis  | BOLD:AAF1478 | 0              | 0.0016        | 0              | 1             |
| COI    | Insecta | Lepidoptera |                |                 |                    |             | BOLD:AAF8577 | 0              | 0.0033        | 0              | 2             |
| COI    | Insecta | Lepidoptera |                |                 |                    |             | BOLD:AAG6034 | 0              | 0.0016        | 0              | 1             |
| COI    | Insecta | Lepidoptera | Erebidae       | Arctiinae       |                    |             | BOLD:AAH2626 | 0              | 0.0081        | 0              | 5             |
| COI    | Insecta | Lepidoptera | Gelechiidae    | Gelechiinae     |                    |             | BOLD:AAH5654 | 0.003          | 0             | 1              | 0             |
| COI    | Insecta | Lepidoptera | Noctuidae      | Noctuinae       |                    |             | BOLD:AAI3519 | 0.009          | 0             | 3              | 0             |
| COI    | Insecta | Lepidoptera | Erebidae       |                 |                    |             | BOLD:AAL4384 | 0              | 0.0016        | 0              | 1             |
| COI    | Insecta | Lepidoptera | Crambidae      | Spilomelinae    | Pleuroptya/Patania | expictalis  | BOLD:AAL4502 | 0.003          | 0             | 1              | 0             |
| COI    | Insecta | Lepidoptera | Erebidae       | Boletobiinae    | Enispa             |             | BOLD:AAL7095 | 0.003          | 0.0033        | 1              | 2             |
| COI    | Insecta | Lepidoptera | Noctuidae      | Noctuinae       |                    |             | BOLD:AAM0480 | 0              | 0.0016        | 0              | 1             |
| COI    | Insecta | Lepidoptera | Notodontidae   | Notodontinae    | Cerura             |             | BOLD:AAM4552 | 0              | 0.0016        | 0              | 1             |
| COI    | Insecta | Lepidoptera | Noctuidae      |                 |                    |             | BOLD:AAM9055 | 0.003          | 0             | 1              | 0             |
| COI    | Insecta | Lepidoptera | Noctuidae      | Noctuinae       |                    |             | BOLD:AAM9761 | 0.003          | 0.0033        | 1              | 2             |
| COI    | Insecta | Lepidoptera | Crambidae      | Pyraustinae     | Goniorhynchus      |             | BOLD:AAN3555 | 0              | 0.0033        | 0              | 2             |

| Primer | Class   | Order       | Family          | Subfamily       | Genus         | Species         | BIN          | M. ussuriensis | M. ikonnikovi | M. ussuriensis | M. ikonnikovi |
|--------|---------|-------------|-----------------|-----------------|---------------|-----------------|--------------|----------------|---------------|----------------|---------------|
| COI    | Insecta | Lepidoptera | Hesperiidae     |                 |               |                 | BOLD:AAN7248 | 0              | 0.0016        | 0              | 1             |
| COI    | Insecta | Lepidoptera | Noctuidae       |                 |               |                 | BOLD:AAP1728 | 0              | 0.0016        | 0              | 1             |
| COI    | Insecta | Lepidoptera | Geometridae     | Ennominae       |               |                 | BOLD:AAP2372 | 0.003          | 0             | 1              | 0             |
| COI    | Insecta | Lepidoptera | Gelechiidae     |                 |               |                 | BOLD:AAQ1460 | 0              | 0.0016        | 0              | 1             |
| COI    | Insecta | Lepidoptera | Crambidae       | Spilomelinae    |               |                 | BOLD:AAQ2087 | 0              | 0.0049        | 0              | 3             |
| COI    | Insecta | Lepidoptera | Geometridae     | Sterrhinae      | Scopula       |                 | BOLD:AAV8961 | 0              | 0.0016        | 0              | 1             |
| COI    | Insecta | Lepidoptera | Erebidae        | Arctiinae       |               |                 | BOLD:AAY5858 | 0              | 0.0016        | 0              | 1             |
| COI    | Insecta | Lepidoptera | Limacodidae     |                 |               |                 | BOLD:AAZ8422 | 0              | 0.0016        | 0              | 1             |
| COI    | Insecta | Lepidoptera | Tortricidae     | Olethreutinae   | Rhopobota     |                 | BOLD:ABA8634 | 0.003          | 0.0016        | 1              | 1             |
| COI    | Insecta | Lepidoptera | Geometridae     | Larentiinae     | Leptostegna   |                 | BOLD:ABU5788 | 0.003          | 0             | 1              | 0             |
| COI    | Insecta | Lepidoptera | Sphingidae      | Smerinthinae    | Marumba       | gaschkewitschii | BOLD:ABU7231 | 0.003          | 0             | 1              | 0             |
| COI    | Insecta | Lepidoptera |                 |                 |               |                 | BOLD:ABU9226 | 0.006          | 0             | 2              | 0             |
| COI    | Insecta | Lepidoptera | Tortricidae     |                 |               |                 | BOLD:ABW0658 | 0              | 0.0016        | 0              | 1             |
| COI    | Insecta | Lepidoptera | Erebidae        | Arctiinae       | Cyana         |                 | BOLD:ABX3752 | 0.003          | 0.0114        | 1              | 7             |
| COI    | Insecta | Lepidoptera | Erebidae        | Erebinae        | Catocala      |                 | BOLD:ABZ3190 | 0.003          | 0             | 1              | 0             |
| COI    | Insecta | Lepidoptera | Erebidae        | Arctiinae       |               |                 | BOLD:ACB1726 | 0              | 0.0016        | 0              | 1             |
| COI    | Insecta | Lepidoptera | Geometridae     | Geometrinae     |               |                 | BOLD:ACE9755 | 0              | 0.0016        | 0              | 1             |
| COI    | Insecta | Lepidoptera | Autostichidae   |                 |               |                 | BOLD:ACF7812 | 0              | 0.0016        | 0              | 1             |
| COI    | Insecta | Lepidoptera | Cosmopterigidae |                 |               |                 | BOLD:ACJ1842 | 0.003          | 0.0016        | 1              | 1             |
| COI    | Insecta | Lepidoptera | Gelechiidae     | Gelechiinae     | Sophronia     |                 | BOLD:ACL1953 | 0              | 0.0016        | 0              | 1             |
| COI    | Insecta | Lepidoptera | Geometridae     | Ennominae       |               |                 | BOLD:ACL6993 | 0              | 0.0033        | 0              | 2             |
| COI    | Insecta | Lepidoptera |                 |                 |               |                 | BOLD:ACM3459 | 0              | 0.0049        | 0              | 3             |
| COI    | Insecta | Lepidoptera | Elachistidae    |                 |               |                 | BOLD:ACM9615 | 0              | 0.0033        | 0              | 2             |
| COI    | Insecta | Lepidoptera | Tortricidae     |                 |               |                 | BOLD:ACN0142 | 0.003          | 0.0033        | 1              | 2             |
| COI    | Insecta | Lepidoptera | Gelechiidae     |                 |               |                 | BOLD:ACN0185 | 0              | 0.0098        | 0              | 6             |
| COI    | Insecta | Lepidoptera | Tortricidae     | Tortricinae     | Choristoneura |                 | BOLD:ACN0625 | 0.003          | 0.0065        | 1              | 4             |
| COI    | Insecta | Lepidoptera | Erebidae        | Hermiinae       |               |                 | BOLD:ACO1434 | 0.003          | 0             | 1              | 0             |
| COI    | Insecta | Lepidoptera | Lasiocampidae   | Poecilocampinae |               |                 | BOLD:ACP2255 | 0              | 0.0033        | 0              | 2             |
| COI    | Insecta | Lepidoptera | Gelechiidae     |                 |               |                 | BOLD:ACR6168 | 0.003          | 0.0016        | 1              | 1             |
| COI    | Insecta | Lepidoptera | Stathmopodidae  | NA              | Stathmopoda   |                 | BOLD:ACV9615 | 0.003          | 0             | 1              | 0             |
| COI    | Insecta | Lepidoptera |                 |                 |               |                 | BOLD:ACW1375 | 0.000          | 0.0081        | 0              | 5             |
| COI    | Insecta | Lepidoptera |                 |                 |               |                 | BOLD:ACX5590 | 0.003          | 0             | 1              | 0             |
| COI    | Insecta | Lepidoptera | Crambidae       |                 |               |                 | BOLD:ACX6648 | 0.003          | 0.0016        | 1              | 1             |
| COI    | Insecta | Lepidoptera |                 |                 |               |                 | BOLD:ADF8756 | 0              | 0.0049        | 0              | 3             |
| COI    | Insecta | Lepidoptera |                 |                 |               |                 | BOLD:ADG3051 | 0              | 0.0016        | 0              | 1             |
| COI    | Insecta | Lepidoptera |                 |                 |               |                 | BOLD:ADI1550 | 0              | 0.0016        | 0              | 1             |
| COI    | Insecta | Lepidoptera | Tortricidae     | Tortricinae     | Acleris       | paradiseana     | BOLD:ADI2826 | 0              | 0.0016        | 0              | 1             |
| COI    | Insecta | Lepidoptera |                 |                 |               |                 | BOLD:ADI2961 | 0              | 0.0098        | 0              | 6             |

| Primer | Class   | Order       | Family         | Subfamily      | Genus                   | Species    | BIN          | M. ussuriensis | M. ikonnikovi | M. ussuriensis | M. ikonnikovi |
|--------|---------|-------------|----------------|----------------|-------------------------|------------|--------------|----------------|---------------|----------------|---------------|
| COI    | Insecta | Lepidoptera |                |                |                         |            | BOLD:ADI4331 | 0              | 0.0016        | 0              | 1             |
| COI    | Insecta | Lepidoptera | Geometridae    | Sterrhinae     | Scopula                 |            | BOLD:ADI7455 | 0              | 0.0033        | 0              | 2             |
| COI    | Insecta | Lepidoptera | Geometridae    | Sterrhinae     | Scopula                 |            | BOLD:ADJ2221 | 0.003          | 0.0098        | 1              | 6             |
| COI    | Insecta | Lepidoptera |                |                |                         |            | GWOSS664-11  | 0.006          | 0             | 2              | 0             |
| COI    | Insecta | Lepidoptera | Geometridae    | Geometrinae    |                         |            | NAGE0164-09  | 0              | 0.0016        | 0              | 1             |
| COI    | Insecta | Lepidoptera | Autostichidae  | Autostichinae  |                         |            | BOLD:AAC7842 | 0              | 0.0016        | 0              | 1             |
| COI    | Insecta | Lepidoptera | Blastobasidae  | Blastobasinae  | Hypatopa                |            | BOLD:AAB9632 | 0              | 0.0033        | 0              | 2             |
| COI    | Insecta | Lepidoptera | Blastobasidae  | Blastobasinae  |                         |            | BOLD:AAX6193 | 0              | 0.0016        | 0              | 1             |
| COI    | Insecta | Lepidoptera | Coleophoridae  | Coleophorinae  | Coleophora              |            | BOLD:AAB8487 | 0              | 0.0033        | 0              | 2             |
| COI    | Insecta | Lepidoptera | Crambidae      | Pyraustinae    | Pyrausta/ Goniorhynchus |            | BOLD:AAD0032 | 0              | 0.0016        | 0              | 1             |
| COI    | Insecta | Lepidoptera |                |                |                         |            | BOLD:ACM1938 | 0.003          | 0.0033        | 1              | 2             |
| COI    | Insecta | Lepidoptera | Crambidae      | Acentropinae   | Nymphula/Elophila       |            | BOLD:AAF2874 | 0.003          | 0             | 1              | 0             |
| COI    | Insecta | Lepidoptera | Crambidae      | Spilomelinae   | Palpita                 |            | BOLD:AAD6468 | 0.025          | 0.0098        | 8              | 6             |
| COI    | Insecta | Lepidoptera | Crambidae      | Spilomelinae   |                         |            | BOLD:AAB6255 | 0              | 0.0016        | 0              | 1             |
| COI    | Insecta | Lepidoptera | Crambidae      | Spilomelinae   | Pleuroptya/ Patania     |            | BOLD:AAB6257 | 0              | 0.0016        | 0              | 1             |
| COI    | Insecta | Lepidoptera | Depressariidae |                |                         |            | BOLD:AAY5033 | 0              | 0.0016        | 0              | 1             |
| COI    | Insecta | Lepidoptera | Depressariidae | Depressariinae | Agonopterix             |            | BOLD:AAF7176 | 0              | 0.0033        | 0              | 2             |
| COI    | Insecta | Lepidoptera | Depressariidae | Depressariinae | Depressaria             |            | BOLD:ACN1500 | 0              | 0.0033        | 0              | 2             |
| COI    | Insecta | Lepidoptera | Depressariidae |                |                         |            | BOLD:ACE7937 | 0.003          | 0             | 1              | 0             |
| COI    | Insecta | Lepidoptera | Drepanidae     | Thyatirinae    | Tetheella               | fluctuosa  | BOLD:AAD3647 | 0              | 0.0033        | 0              | 2             |
| COI    | Insecta | Lepidoptera | Erebidae       |                |                         |            | BOLD:AAB7538 | 0.009          | 0             | 3              | 0             |
| COI    | Insecta | Lepidoptera | Erebidae       | Erebinae       | Catocala                |            | BOLD:AAE9541 | 0.003          | 0.0016        | 1              | 1             |
| COI    | Insecta | Lepidoptera | Erebidae       | Arctiinae      |                         |            | BOLD:AAC3572 | 0              | 0.0049        | 0              | 3             |
| COI    | Insecta | Lepidoptera | Erebidae       | Hypeninae      |                         |            | BOLD:AAC7130 | 0              | 0.0016        | 0              | 1             |
| COI    | Insecta | Lepidoptera | Erebidae       | Erebinae       | Ercheia                 |            | BOLD:AAD8285 | 0.003          | 0             | 1              | 0             |
| COI    | Insecta | Lepidoptera | Erebidae       | Erebinae       | Thyas                   | juno       | BOLD:AAF1405 | 0.003          | 0             | 1              | 0             |
| COI    | Insecta | Lepidoptera | Erebidae       | Erebinae       |                         |            | BOLD:ABX5513 | 0.003          | 0             | 1              | 0             |
| COI    | Insecta | Lepidoptera | Erebidae       | Arctiinae      |                         |            | BOLD:ACE8889 | 0              | 0.0081        | 0              | 5             |
| COI    | Insecta | Lepidoptera | Erebidae       |                |                         |            | BOLD:ACT9815 | 0.003          | 0             | 1              | 0             |
| COI    | Insecta | Lepidoptera | Erebidae       |                |                         |            | BOLD:ADF0678 | 0.003          | 0.0016        | 1              | 1             |
| COI    | Insecta | Lepidoptera | Erebidae       | Herminiinae    | Hydrillodes             |            | BOLD:ACU0270 | 0.003          | 0.0049        | 1              | 3             |
| COI    | Insecta | Lepidoptera |                |                |                         |            | BOLD:AAV8834 | 0.003          | 0.0033        | 1              | 2             |
| COI    | Insecta | Lepidoptera | Erebidae       | Lymantriinae   | Lymantria               | dispar     | BOLD:AAA2052 | 0.003          | 0             | 1              | 0             |
| COI    | Insecta | Lepidoptera | Erebidae       | Lymantriinae   | Lymantria               | monacha    | BOLD:AAA5537 | 0.006          | 0.0033        | 2              | 2             |
| COI    | Insecta | Lepidoptera | Erebidae       | Pangrapinae    | Pangrapta               |            | BOLD:ADF1765 | 0.003          | 0             | 1              | 0             |
| COI    | Insecta | Lepidoptera | Gelechiidae    | Gelechiinae    | Gelechia                | cuneatella | BOLD:AAF5086 | 0              | 0.0033        | 0              | 2             |
| COI    | Insecta | Lepidoptera | Gelechiidae    | Gelechiinae    | Psoricoptera            | gibbosella | BOLD:AAD0608 | 0.009          | 0.0081        | 3              | 5             |
| COI    | Insecta | Lepidoptera | Gelechiidae    |                |                         |            | BOLD:ABA1140 | 0.003          | 0.0033        | 1              | 2             |

| Primer | Class   | Order       | Family         | Subfamily      | Genus          | Species        | BIN          | M. ussuriensis | M. ikonnikovi | M. ussuriensis | M. ikonnikovi |
|--------|---------|-------------|----------------|----------------|----------------|----------------|--------------|----------------|---------------|----------------|---------------|
| COI    | Insecta | Lepidoptera | Geometridae    | Ennominae      |                |                | BOLD:ACG8719 | 0.003          | 0             | 1              | 0             |
| COI    | Insecta | Lepidoptera | Geometridae    | Ennominae      | Cleora         | insolita       | BOLD:ACJ3813 | 0.006          | 0             | 2              | 0             |
| COI    | Insecta | Lepidoptera | Geometridae    | Ennominae      |                |                | BOLD:AAC6655 | 0.003          | 0             | 1              | 0             |
| COI    | Insecta | Lepidoptera | Geometridae    | Ennominae      | Deileptenia    | ribeata        | BOLD:AAC3800 | 0              | 0.0016        | 0              | 1             |
| COI    | Insecta | Lepidoptera | Geometridae    | Ennominae      | Ectropis       |                | BOLD:AAB5227 | 0.003          | 0.0016        | 1              | 1             |
| COI    | Insecta | Lepidoptera | Geometridae    | Ennominae      | Ectropis       | crepuscularia  | BOLD:AAA2076 | 0.003          | 0             | 1              | 0             |
| COI    | Insecta | Lepidoptera | Geometridae    | Ennominae      | Endropiodes    |                | BOLD:AAF7479 | 0.003          | 0             | 1              | 0             |
| COI    | Insecta | Lepidoptera | Geometridae    | Larentiinae    | Gandaritis     | fixseni        | BOLD:AAY1335 | 0.003          | 0             | 1              | 0             |
| COI    | Insecta | Lepidoptera | Geometridae    | Larentiinae    | Gandaritis     |                | BOLD:AAB5983 | 0              | 0.0016        | 0              | 1             |
| COI    | Insecta | Lepidoptera | Geometridae    | Geometrinae    | Geometra       |                | BOLD:AAB2011 | 0              | 0.0016        | 0              | 1             |
| COI    | Insecta | Lepidoptera | Geometridae    | Ennominae      | Protoboarmia   |                | BOLD:AAA2077 | 0              | 0.0016        | 0              | 1             |
| COI    | Insecta | Lepidoptera | Geometridae    | Larentiinae    | Eupithecia     |                | BOLD:AAA2083 | 0.003          | 0             | 1              | 0             |
| COI    | Insecta | Lepidoptera | Geometridae    | Sterrhinae     | Cyclophora     |                | BOLD:AAD6021 | 0.003          | 0.0033        | 1              | 2             |
| COI    | Insecta | Lepidoptera | Geometridae    | Geometrinae    |                |                | BOLD:AAE5087 | 0.003          | 0.0081        | 1              | 5             |
| COI    | Insecta | Lepidoptera | Geometridae    | Ennominae      |                |                | BOLD:AAE6522 | 0              | 0.0033        | 0              | 2             |
| COI    | Insecta | Lepidoptera | Geometridae    | Ennominae      | Menophra       | senilis        | BOLD:AAF3823 | 0.003          | 0             | 1              | 0             |
| COI    | Insecta | Lepidoptera | Geometridae    | Ennominae      |                |                | BOLD:AAL8521 | 0.003          | 0             | 1              | 0             |
| COI    | Insecta | Lepidoptera | Geometridae    | Ennominae      |                |                | BOLD:AAP9222 | 0              | 0.0016        | 0              | 1             |
| COI    | Insecta | Lepidoptera | Geometridae    |                |                |                | BOLD:AAZ1901 | 0              | 0.0033        | 0              | 2             |
| COI    | Insecta | Lepidoptera | Geometridae    | Ennominae      |                |                | BOLD:ABU6285 | 0              | 0.0016        | 0              | 1             |
| COI    | Insecta | Lepidoptera | Geometridae    | Geometrinae    | Jodis          | putata         | BOLD:ABZ4040 | 0.003          | 0.0016        | 1              | 1             |
| COI    | Insecta | Lepidoptera | Geometridae    | Larentiinae    |                |                | BOLD:ACB9627 | 0.003          | 0.0016        | 1              | 1             |
| COI    | Insecta | Lepidoptera | Geometridae    |                |                |                | BOLD:ADF1852 | 0.009          | 0             | 3              | 0             |
| COI    | Insecta | Lepidoptera | Geometridae    | Sterrhinae     | Scopula        |                | LNAUS1341-13 | 0              | 0.0065        | 0              | 4             |
| COI    | Insecta | Lepidoptera | Geometridae    | Ennominae      | Hypomecis      | punctinalis    | BOLD:ACA2461 | 0.012          | 0             | 4              | 0             |
| COI    | Insecta | Lepidoptera | Geometridae    | Ennominae      |                |                | BOLD:ACS9064 | 0.003          | 0             | 1              | 0             |
| COI    | Insecta | Lepidoptera | Geometridae    | Ennominae      |                |                | BOLD:AAB6560 | 0.003          | 0             | 1              | 0             |
| COI    | Insecta | Lepidoptera | Geometridae    | Ennominae      | Ourapteryx     | maculicaudaria | BOLD:AAW9443 | 0.003          | 0             | 1              | 0             |
| COI    | Insecta | Lepidoptera | Geometridae    | Ennominae      |                |                | BOLD:AAA2521 | 0              | 0.0016        | 0              | 1             |
| COI    | Insecta | Lepidoptera | Geometridae    | Ennominae      | Phthonosema    | tendinosaria   | BOLD:AAF6489 | 0.006          | 0             | 2              | 0             |
| COI    | Insecta | Lepidoptera | Gracillariidae | Gracillariinae | Caloptilia     | cf. heringi    | BOLD:ADK1669 | 0              | 0.0033        | 0              | 2             |
| COI    | Insecta | Lepidoptera | Gracillariidae | Gracillariinae | Caloptilia     | hidakensis     | BOLD:AAK1674 | 0              | 0.0016        | 0              | 1             |
| COI    | Insecta | Lepidoptera | Gracillariidae | Gracillariinae | Caloptilia     |                | BOLD:ACL6329 | 0              | 0.0016        | 0              | 1             |
| COI    | Insecta | Lepidoptera | Gracillariidae | Gracillariinae |                |                | BOLD:ADK2510 | 0              | 0.0016        | 0              | 1             |
| COI    | Insecta | Lepidoptera | Hepialidae     | Hepialinae     |                |                | BOLD:AAO2948 | 0.003          | 0             | 1              | 0             |
| COI    | Insecta | Lepidoptera | Hepialidae     | Hepialinae     |                |                | BOLD:ACN8703 | 0              | 0.0016        | 0              | 1             |
| COI    | Insecta | Lepidoptera | Hesperiidae    | Coeliadinae    | Burara/Bibasis | aquilina       | BOLD:ACD6545 | 0.009          | 0             | 3              | 0             |
| COI    | Insecta | Lepidoptera | Hesperiidae    | Hesperinae     |                |                | LIMBC545-11  | 0.006          | 0.0065        | 2              | 4             |



| Primer | Class   | Order       | Family         | Subfamily      | Genus        | Species    | BIN          | M. ussuriensis | M. ikonnikovi | M. ussuriensis | M. ikonnikovi |
|--------|---------|-------------|----------------|----------------|--------------|------------|--------------|----------------|---------------|----------------|---------------|
| COI    | Insecta | Lepidoptera | Hesperiidae    | Hesperiinae    | Thoressa     | varia      | BOLD:ADK0840 | 0.003          | 0             | 1              | 0             |
| COI    | Insecta | Lepidoptera | Lasiocampidae  | Lasiocampinae  | Euthrix      | potatoria  | BOLD:AAC1584 | 0.003          | 0.0049        | 1              | 3             |
| COI    | Insecta | Lepidoptera | Lecithoceridae |                |              |            | BOLD:AAD6680 | 0              | 0.0016        | 0              | 1             |
| COI    | Insecta | Lepidoptera | Limacodidae    | Limacodinae    |              |            | BOLD:ACE6221 | 0              | 0.0049        | 0              | 3             |
| COI    | Insecta | Lepidoptera | Limacodidae    | Limacodinae    |              |            | BOLD:AAA9203 | 0.003          | 0.0033        | 1              | 2             |
| COI    | Insecta | Lepidoptera | Limacodidae    |                |              |            | BOLD:ACC2517 | 0.003          | 0.0016        | 1              | 1             |
| COI    | Insecta | Lepidoptera | Limacodidae    | Limacodinae    | Parasa       |            | BOLD:AAM0823 | 0.003          | 0.0065        | 1              | 4             |
| COI    | Insecta | Lepidoptera | Limacodidae    | Limacodinae    | Phrixolepia  |            | BOLD:AAV5028 | 0              | 0.0016        | 0              | 1             |
| COI    | Insecta | Lepidoptera | Lycaenidae     | Theclinae      | Rapala       |            | BOLD:AAL1375 | 0.003          | 0.0016        | 1              | 1             |
| COI    | Insecta | Lepidoptera | Noctuidae      | Acronictinae   | Acronicta    |            | BOLD:ADK0044 | 0.003          | 0             | 1              | 0             |
| COI    | Insecta | Lepidoptera | Noctuidae      | Pantheinae     | Anacronicta  |            | BOLD:AAK1458 | 0.003          | 0             | 1              | 0             |
| COI    | Insecta | Lepidoptera | Noctuidae      | Noctuinae      | Apamea       | helva      | BOLD:AAC5412 | 0.003          | 0             | 1              | 0             |
| COI    | Insecta | Lepidoptera | Noctuidae      | Noctuinae      | Athetis      |            | BOLD:AAV0425 | 0.003          | 0             | 1              | 0             |
| COI    | Insecta | Lepidoptera | Noctuidae      | Acronictinae   | Belciades    | niveola    | BOLD:ACU0724 | 0.003          | 0             | 1              | 0             |
| COI    | Insecta | Lepidoptera | Noctuidae      | Amphipyriinae  | Brachionycha | nubeculosa | BOLD:AAE0860 | 0.003          | 0             | 1              | 0             |
| COI    | Insecta | Lepidoptera |                |                |              |            | BOLD:ADF8757 | 0.009          | 0             | 3              | 0             |
| COI    | Insecta | Lepidoptera | Noctuidae      |                |              |            | BOLD:ACT9151 | 0.003          | 0             | 1              | 0             |
| COI    | Insecta | Lepidoptera | Noctuidae      | Noctuinae      |              |            | BOLD:ACJ1078 | 0.006          | 0             | 2              | 0             |
| COI    | Insecta | Lepidoptera | Noctuidae      | Oncocnemidinae |              |            | BOLD:AAE4319 | 0.003          | 0             | 1              | 0             |
| COI    | Insecta | Lepidoptera | Noctuidae      | Plusiinae      |              |            | BOLD:AAE7504 | 0.003          | 0             | 1              | 0             |
| COI    | Insecta | Lepidoptera | Noctuidae      | Amphipyriinae  |              |            | BOLD:AAW4866 | 0.003          | 0.0016        | 1              | 1             |
| COI    | Insecta | Lepidoptera | Noctuidae      | Noctuinae      | Leucania     |            | BOLD:AAJ2503 | 0.003          | 0             | 1              | 0             |
| COI    | Insecta | Lepidoptera | Noctuidae      | Noctuinae      | Lithophane   | socialis   | BOLD:AAE6607 | 0.003          | 0             | 1              | 0             |
| COI    | Insecta | Lepidoptera | Noctuidae      | Noctuinae      | Spodoptera   | exigua     | BOLD:AAA6644 | 0              | 0.0049        | 0              | 3             |
| COI    | Insecta | Lepidoptera | Noctuidae      | Noctuinae      | Spodoptera   | cilium     | BOLD:AAC8279 | 0              | 0.0049        | 0              | 3             |
| COI    | Insecta | Lepidoptera | Noctuidae      | Amphipyriinae  |              |            | BOLD:AAH5319 | 0              | 0.0016        | 0              | 1             |
| COI    | Insecta | Lepidoptera |                |                |              |            | BOLD:ADG3545 | 0.003          | 0             | 1              | 0             |
| COI    | Insecta | Lepidoptera |                |                |              |            | BOLD:AAB6211 | 0.003          | 0             | 1              | 0             |
| COI    | Insecta | Lepidoptera | Noctuidae      | Noctuinae      |              |            | BOLD:AAB6980 | 0.006          | 0             | 2              | 0             |
| COI    | Insecta | Lepidoptera | Noctuidae      | Noctuinae      | Xylena       |            | BOLD:AAE4735 | 0.003          | 0.0065        | 1              | 4             |
| COI    | Insecta | Lepidoptera | Nolidae        | Chloephorinae  | Nycteola     |            | BOLD:AAE2641 | 0              | 0.0016        | 0              | 1             |
| COI    | Insecta | Lepidoptera | Nolidae        | Nolinae        | Nola         | confusalis | BOLD:AAB5563 | 0              | 0.0016        | 0              | 1             |
| COI    | Insecta | Lepidoptera | Nolidae        | Nolinae        |              |            | BOLD:AAL7275 | 0              | 0.0049        | 0              | 3             |
| COI    | Insecta | Lepidoptera | Nolidae        | Chloephorinae  | Pseudoips    | prasinana  | BOLD:AAB8807 | 0              | 0.0033        | 0              | 2             |
| COI    | Insecta | Lepidoptera | Notodontidae   |                |              |            | BOLD:AAM3801 | 0              | 0.0016        | 0              | 1             |
| COI    | Insecta | Lepidoptera | Notodontidae   | Notodontinae   |              |            | BOLD:AAL6465 | 0.003          | 0             | 1              | 0             |
| COI    | Insecta | Lepidoptera | Notodontidae   | Heterocampinae |              |            | BOLD:AAM4825 | 0              | 0.0016        | 0              | 1             |
| COI    | Insecta | Lepidoptera | Notodontidae   | Notodontinae   | Notodonta    |            | BOLD:AAC1146 | 0.003          | 0             | 1              | 0             |

| Primer | Class   | Order       | Family         | Subfamily      | Genus         | Species      | BIN          | M. ussuriensis | M. ikonnikovi | M. ussuriensis | M. ikonnikovi |
|--------|---------|-------------|----------------|----------------|---------------|--------------|--------------|----------------|---------------|----------------|---------------|
| COI    | Insecta | Lepidoptera | Notodontidae   | Notodontinae   | Shaka         |              | BOLD:ACJ1076 | 0              | 0.0016        | 0              | 1             |
| COI    | Insecta | Lepidoptera | Notodontidae   | Heterocampinae | Stauropus     | fagi         | BOLD:AAD0646 | 0.003          | 0             | 1              | 0             |
| COI    | Insecta | Lepidoptera | Nymphalidae    | Heliconiinae   | Boloria       |              | BOLD:AAB9155 | 0              | 0.0033        | 0              | 2             |
| COI    | Insecta | Lepidoptera | Oecophoridae   | Oecophorinae   |               |              | BOLD:AAF9734 | 0              | 0.0033        | 0              | 2             |
| COI    | Insecta | Lepidoptera | Papilionidae   | Papilioninae   | Papilio       |              | BOLD:AAI5285 | 0.003          | 0             | 1              | 0             |
| COI    | Insecta | Lepidoptera | Pyralidae      | Pyralinae      | Endotracha    | olivacealis  | BOLD:ACI9403 | 0              | 0.0016        | 0              | 1             |
| COI    | Insecta | Lepidoptera | Saturniidae    |                |               |              | BOLD:AAA5428 | 0              | 0.0016        | 0              | 1             |
| COI    | Insecta | Lepidoptera | Saturniidae    | Saturniinae    | Saturnia      |              | BOLD:AAB9581 | 0.025          | 0.0033        | 8              | 2             |
| COI    | Insecta | Lepidoptera | Saturniidae    | Saturniinae    | Saturnia      | jonasii      | BOLD:AAD1452 | 0.003          | 0             | 1              | 0             |
| COI    | Insecta | Lepidoptera | Sphingidae     | Smerinthinae   | Callambulyx   |              | BOLD:ABY4871 | 0.003          | 0             | 1              | 0             |
| COI    | Insecta | Lepidoptera | Sphingidae     | Macroglossinae |               |              | BOLD:AAB0931 | 0              | 0.0016        | 0              | 1             |
| COI    | Insecta | Lepidoptera | Sphingidae     | Sphinginae     | Sphinx        | ligustri     | BOLD:AAB6107 | 0.003          | 0             | 1              | 0             |
| COI    | Insecta | Lepidoptera | Sphingidae     | Sphinginae     | Sphinx        |              | BOLD:ACF5246 | 0.003          | 0             | 1              | 0             |
| COI    | Insecta | Lepidoptera | Stathmopodidae | NA             | Stathmopoda   | pedella      | BOLD:AAD4282 | 0              | 0.0016        | 0              | 1             |
| COI    | Insecta | Lepidoptera | Tineidae       | Scardiinae     | Morophaga     | bucephala    | BOLD:AAG8510 | 0              | 0.0016        | 0              | 1             |
| COI    | Insecta | Lepidoptera | Tortricidae    | Tortricinae    |               |              | BOLD:AAC3136 | 0              | 0.0016        | 0              | 1             |
| COI    | Insecta | Lepidoptera | Tortricidae    | Tortricinae    | Archips       | betulana     | BOLD:ACM3437 | 0.003          | 0.0081        | 1              | 5             |
| COI    | Insecta | Lepidoptera | Tortricidae    | Tortricinae    | Archips       |              | BOLD:AAB5839 | 0              | 0.0033        | 0              | 2             |
| COI    | Insecta | Lepidoptera | Tortricidae    | Tortricinae    | Choristoneura | diversana    | BOLD:AAD8048 | 0.006          | 0.0130        | 2              | 8             |
| COI    | Insecta | Lepidoptera | Tortricidae    | Tortricinae    |               |              | BOLD:ACT2120 | 0.003          | 0.0016        | 1              | 1             |
| COI    | Insecta | Lepidoptera | Tortricidae    | Tortricinae    | Dichelia      |              | ANICU1645-11 | 0.003          | 0             | 1              | 0             |
| COI    | Insecta | Lepidoptera | Tortricidae    | Tortricinae    | Eana          | incanana     | BOLD:AAD7476 | 0              | 0.0016        | 0              | 1             |
| COI    | Insecta | Lepidoptera | Tortricidae    | Olethreutinae  | Epinotia      |              | BOLD:AAE1784 | 0              | 0.0033        | 0              | 2             |
| COI    | Insecta | Lepidoptera | Tortricidae    | Olethreutinae  | Epinotia      | nisella      | BOLD:AAA7530 | 0              | 0.0016        | 0              | 1             |
| COI    | Insecta | Lepidoptera | Tortricidae    | Olethreutinae  | Eudemis       | porphyra     | BOLD:AAC6854 | 0              | 0.0033        | 0              | 2             |
| COI    | Insecta | Lepidoptera | Tortricidae    | Olethreutinae  | Gypsonoma     | dealbana     | BOLD:AAB0380 | 0              | 0.0016        | 0              | 1             |
| COI    | Insecta | Lepidoptera | Tortricidae    | Olethreutinae  | Lobesia       |              | BOLD:ABV8007 | 0.003          | 0.0016        | 1              | 1             |
| COI    | Insecta | Lepidoptera | Tortricidae    | Olethreutinae  |               |              | BOLD:ABZ7645 | 0              | 0.0016        | 0              | 1             |
| COI    | Insecta | Lepidoptera | Tortricidae    | Olethreutinae  | Olethreutes   |              | BOLD:ACS0054 | 0              | 0.0065        | 0              | 4             |
| COI    | Insecta | Lepidoptera | Tortricidae    | Tortricinae    | Pandemis      | cinnamomeana | BOLD:AAD0575 | 0.003          | 0.0016        | 1              | 1             |
| COI    | Insecta | Lepidoptera | Tortricidae    | Tortricinae    | Pandemis      | corylana     | BOLD:AAC5400 | 0.003          | 0             | 1              | 0             |
| COI    | Insecta | Lepidoptera | Tortricidae    | Olethreutinae  | Phiaris       |              | BOLD:AAJ2026 | 0              | 0.0016        | 0              | 1             |
| COI    | Insecta | Lepidoptera | Tortricidae    | Tortricinae    | Ptycholoma    | lecheanum    | BOLD:AAD3264 | 0              | 0.0033        | 0              | 2             |
| COI    | Insecta | Lepidoptera | Tortricidae    | Olethreutinae  | Rhopobota     | naevana      | BOLD:AAA9812 | 0              | 0.0065        | 0              | 4             |
| COI    | Insecta | Lepidoptera | Tortricidae    | Olethreutinae  |               |              | BOLD:AAA0213 | 0.003          | 0             | 1              | 0             |
| COI    | Insecta | Lepidoptera | Tortricidae    | Olethreutinae  | Spilonota     | laricana     | BOLD:AAA7739 | 0              | 0.0016        | 0              | 1             |
| COI    | Insecta | Lepidoptera | Tortricidae    | Tortricinae    | Archips       | crataeganus  | BOLD:AAD6620 | 0              | 0.0049        | 0              | 3             |
| COI    | Insecta | Lepidoptera |                |                |               |              | BOLD:AAH4639 | 0              | 0.0016        | 0              | 1             |

| Primer | Class     | Order       | Family           | Subfamily         | Genus          | Species        | BIN          | M. ussuriensis | M. ikonnikovi | M. ussuriensis | M. ikonnikovi |
|--------|-----------|-------------|------------------|-------------------|----------------|----------------|--------------|----------------|---------------|----------------|---------------|
| COI    | Insecta   | Lepidoptera | Tortricidae      | Olethreutinae     | Epinotia       |                | BOLD:AAN7425 | 0              | 0.0016        | 0              | 1             |
| COI    | Insecta   | Lepidoptera | Tortricidae      | Olethreutinae     |                |                | BOLD:AAV9504 | 0              | 0.0016        | 0              | 1             |
| COI    | Insecta   | Lepidoptera | Tortricidae      |                   |                |                | BOLD:ADE9961 | 0              | 0.0016        | 0              | 1             |
| COI    | Insecta   | Lepidoptera | Tortricidae      | Tortricinae       |                |                | BOLD:ACP8754 | 0.003          | 0.0033        | 1              | 2             |
| COI    | Insecta   | Lepidoptera | Tortricidae      | Olethreutinae     | Zeiraphera     | rufimitrana    | BOLD:AAM3356 | 0              | 0.0033        | 0              | 2             |
| COI    | Insecta   | Lepidoptera | Uraniidae        | Uraniinae         |                |                | BOLD:ACF4699 | 0              | 0.0049        | 0              | 3             |
| COI    | Insecta   | Lepidoptera | Yponomeutidae    | Yponomeutinae     |                |                | BOLD:AAE4109 | 0.003          | 0.0016        | 1              | 1             |
| COI    | Insecta   | Lepidoptera | Ypsolophidae     | Ypsolophinae      | Ypsolopha      | vittella       | BOLD:AAD9548 | 0              | 0.0016        | 0              | 1             |
| COI    | Insecta   | Lepidoptera |                  |                   |                |                | BOLD:AAD3218 | 0.003          | 0.0016        | 1              | 1             |
| COI    | Insecta   | Mecoptera   | Panorpidae       | Panorpiinae       | Panorpa        | pryeri         | BOLD:ACA3726 | 0              | 0.0016        | 0              | 1             |
| COI    | Insecta   | Neuroptera  | Hemerobiidae     | Drepanopteryginae | Drepanopteryx  |                | BOLD:ACT2374 | 0.003          | 0             | 1              | 0             |
| COI    | Insecta   | Neuroptera  | Hemerobiidae     | Hemerobiinae      | Hemerobius     |                | BOLD:AAG0897 | 0.006          | 0.0016        | 2              | 1             |
| COI    | Insecta   | Neuroptera  | Hemerobiidae     | Hemerobiinae      | Hemerobius     |                | BOLD:ABZ0149 | 0              | 0.0016        | 0              | 1             |
| COI    | Insecta   | Neuroptera  | Hemerobiidae     | Hemerobiinae      | Hemerobius     | fenestratus    | BOLD:AAU3559 | 0.006          | 0.0081        | 2              | 5             |
| COI    | Insecta   | Neuroptera  | Hemerobiidae     | Hemerobiinae      | Hemerobius     | simulans       | BOLD:ACM1832 | 0.003          | 0.0049        | 1              | 3             |
| COI    | Insecta   | Neuroptera  | Hemerobiidae     | Hemerobiinae      |                |                | BOLD:ABU9030 | 0.003          | 0.0016        | 1              | 1             |
| COI    | Insecta   | Neuroptera  | Osmylidae        |                   |                |                | INRMA502-12  | 0              | 0.0016        | 0              | 1             |
| COI    | Insecta   | Plecoptera  | Nemouridae       | Amphinemurinae    |                |                | BOLD:AAL6222 | 0              | 0.0016        | 0              | 1             |
| COI    | Insecta   | Psocodea    | Psocidae         | Psocinae          | Psococercastis |                | BOLD:ACC5474 | 0              | 0.0016        | 0              | 1             |
| COI    | Insecta   | Trichoptera | Lepidostomatidae | Lepidostomatinae  | Lepidostoma    | elongatum      | RUSST089-12  | 0              | 0.0016        | 0              | 1             |
| COI    | Insecta   | Trichoptera | Psychomyiidae    | Psychomyiinae     | Tinodes        | higashiyamanus | BOLD:ACD6706 | 0              | 0.0016        | 0              | 1             |
| COI    | Insecta   | Trichoptera | Thremmatidae     | Thremmatinae      | Neophylax      | ussuriensis    | BOLD:AAG9568 | 0              | 0.0049        | 0              | 3             |
| 16S    | Arachnida | Opiliones   | Sclerosomatidae  | Leiobuninae       | Leiobunum      | tohokuense     | NA           | 0              | 0.0016        | 0              | 1             |
| 16S    | Insecta   | Coleoptera  | Elateridae       | Elaterinae        | Agriotes       |                | NA           | 0.003          | 0             | 1              | 0             |
| 16S    | Insecta   | Coleoptera  | Scarabaeidae     | Rutelinae         | Anomala        |                | NA           | 0.003          | 0             | 1              | 0             |
| 16S    | Insecta   | Coleoptera  | Curculionidae    | Curculioninae     | Curculio       |                | NA           | 0.003          | 0             | 1              | 0             |
| 16S    | Insecta   | Coleoptera  | Cerambycidae     | Lamiinae          | Eutetrappa     |                | NA           | 0.003          | 0             | 1              | 0             |
| 16S    | Insecta   | Coleoptera  | Tenebrionidae    | Alleculinae       | Hymenalia      |                | NA           | 0.003          | 0.0033        | 1              | 2             |
| 16S    | Insecta   | Coleoptera  | Scarabaeidae     |                   |                |                | NA           | 0.006          | 0.0016        | 2              | 1             |
| 16S    | Insecta   | Coleoptera  | Scarabaeidae     |                   |                |                | NA           | 0              | 0.0016        | 0              | 1             |
| 16S    | Insecta   | Coleoptera  | Melandryidae     | Malandryinae      | Phloiotrya     | planuscula     | NA           | 0              | 0.0033        | 0              | 2             |
| 16S    | Insecta   | Coleoptera  | Scarabaeidae     |                   |                |                | NA           | 0.012          | 0.0016        | 4              | 1             |
| 16S    | Insecta   | Coleoptera  | Cantharidae      | Cantharinae       | Podabrus       |                | NA           | 0              | 0.0033        | 0              | 2             |
| 16S    | Insecta   | Coleoptera  | Chrysomelidae    |                   |                |                | NA           | 0.003          | 0             | 1              | 0             |
| 16S    | Insecta   | Dermaptera  | Forficulidae     | Anechurinae       | Anechura       | harmandi       | NA           | 0.022          | 0             | 7              | 0             |
| 16S    | Insecta   | Dermaptera  | Forficulidae     | Forficulinae      | Forficula      | mikado         | NA           | 0.009          | 0             | 3              | 0             |
| 16S    | Insecta   | Diptera     | Mycetophilidae   | Gnoristinae       | Boletina       |                | NA           | 0              | 0.0016        | 0              | 1             |
| 16S    | Insecta   | Diptera     | Tachinidae       | Exoristinae       | Botria         | japonica       | NA           | 0              | 0.0016        | 0              | 1             |

| Primer | Class   | Order         | Family                   | Subfamily       | Genus            | Species           | BIN | M. ussuriensis | M. ikonnikovi | M. ussuriensis | M. ikonnikovi |
|--------|---------|---------------|--------------------------|-----------------|------------------|-------------------|-----|----------------|---------------|----------------|---------------|
| 16S    | Insecta | Diptera       | Sciaridae                | NA              | Chaetosciara     |                   | NA  | 0              | 0.0016        | 0              | 1             |
| 16S    | Insecta | Diptera       | Calliphoridae            | Chrysomyinae    | Chrysomya        |                   | NA  | 0              | 0.0016        | 0              | 1             |
| 16S    | Insecta | Diptera       | Empidoidea (Superfamily) |                 |                  |                   | NA  | 0              | 0.0016        | 0              | 1             |
| 16S    | Insecta | Diptera       | Culicidae                | Culicinae       | Culex            |                   | NA  | 0.003          | 0             | 1              | 0             |
| 16S    | Insecta | Diptera       | Culicidae                | Culicinae       | Culex            | tritaeniorhynchus | NA  | 0              | 0.0065        | 0              | 4             |
| 16S    | Insecta | Diptera       | Limoniidae               | Limoniinae      | Dicranomyia      |                   | NA  | 0              | 0.0016        | 0              | 1             |
| 16S    | Insecta | Diptera       | Limoniidae               | Limoniinae      | Dicranomyia      |                   | NA  | 0              | 0.0081        | 0              | 5             |
| 16S    | Insecta | Diptera       | Limoniidae               | Limoniinae      | Dicranomyia      |                   | NA  | 0              | 0.0016        | 0              | 1             |
| 16S    | Insecta | Diptera       | Limoniidae               | Limoniinae      | Dicranomyia      |                   | NA  | 0              | 0.0065        | 0              | 4             |
| 16S    | Insecta | Diptera       | Tachinidae               | Exoristinae     | Eumea            | linearicornis     | NA  | 0.003          | 0             | 1              | 0             |
| 16S    | Insecta | Diptera       | Mycetophilidae           | Mycetophilinae  | Exechia          |                   | NA  | 0              | 0.0033        | 0              | 2             |
| 16S    | Insecta | Diptera       | Mycetophilidae           | Mycetophilinae  | Exechia          |                   | NA  | 0              | 0.0033        | 0              | 2             |
| 16S    | Insecta | Diptera       | Tachinidae               | Exoristinae     | Gonia            | chinensis         | NA  | 0.003          | 0             | 1              | 0             |
| 16S    | Insecta | Diptera       | Limoniidae               |                 |                  |                   | NA  | 0              | 0.0016        | 0              | 1             |
| 16S    | Insecta | Diptera       | Chironomidae             | Chironominae    | Micropsectra     |                   | NA  | 0              | 0.0016        | 0              | 1             |
| 16S    | Insecta | Diptera       | Chironomidae             | Chironominae    | Micropsectra     |                   | NA  | 0              | 0.0016        | 0              | 1             |
| 16S    | Insecta | Diptera       | Mycetophilidae           | Mycetophilinae  | Mycetophila      |                   | NA  | 0              | 0.0016        | 0              | 1             |
| 16S    | Insecta | Diptera       | Mycetophilidae           | Mycetophilinae  | Mycetophila      | fungorum          | NA  | 0              | 0.0049        | 0              | 3             |
| 16S    | Insecta | Diptera       | Mycetophilidae           | Mycomyinae      | Mycomya          |                   | NA  | 0              | 0.0016        | 0              | 1             |
| 16S    | Insecta | Diptera       |                          |                 |                  |                   | NA  | 0.003          | 0             | 1              | 0             |
| 16S    | Insecta | Diptera       | Empidoidea (Superfamily) |                 |                  |                   | NA  | 0              | 0.0016        | 0              | 1             |
| 16S    | Insecta | Diptera       | Limoniidae               |                 |                  |                   | NA  | 0.003          | 0.0212        | 1              | 13            |
| 16S    | Insecta | Diptera       | Psychodidae              |                 |                  |                   | NA  | 0.003          | 0.0114        | 1              | 7             |
| 16S    | Insecta | Diptera       | Rhagionidae              |                 |                  |                   | NA  | 0              | 0.0016        | 0              | 1             |
| 16S    | Insecta | Diptera       | Tipulidae                |                 |                  |                   | NA  | 0              | 0.0049        | 0              | 3             |
| 16S    | Insecta | Diptera       | Culicidae                | Culicinae       | Ochlerotatus     |                   | NA  | 0.003          | 0.0016        | 1              | 1             |
| 16S    | Insecta | Diptera       | Pediciidae               | Pediciinae      | Pedicia          |                   | NA  | 0              | 0.0081        | 0              | 5             |
| 16S    | Insecta | Diptera       | Rhinophoridae            |                 |                  |                   | NA  | 0.003          | 0             | 1              | 0             |
| 16S    | Insecta | Diptera       | Mycetophilidae           | Mycetophilinae  | Pseudobrachypeza |                   | NA  | 0              | 0.0016        | 0              | 1             |
| 16S    | Insecta | Diptera       | Phoridae                 | Phorinae        | Stichillus       |                   | NA  | 0.003          | 0.0016        | 1              | 1             |
| 16S    | Insecta | Diptera       | Tachinidae               | Exoristinae     | Suensonomyia     | nudinerva         | NA  | 0.003          | 0             | 1              | 0             |
| 16S    | Insecta | Diptera       | Mycetophilidae           |                 |                  |                   | NA  | 0              | 0.0016        | 0              | 1             |
| 16S    | Insecta | Diptera       | Muscidae                 | Azeliinae       | Thricops         |                   | NA  | 0              | 0.0016        | 0              | 1             |
| 16S    | Insecta | Diptera       | Tipulidae                | Tipulinae       | Tipula           |                   | NA  | 0.006          | 0.0098        | 2              | 6             |
| 16S    | Insecta | Diptera       | Tipulidae                | Tipulinae       | Tipula           |                   | NA  | 0.003          | 0.0065        | 1              | 4             |
| 16S    | Insecta | Diptera       | Mycetophilidae           | Mycetophilinae  |                  |                   | NA  | 0              | 0.0016        | 0              | 1             |
| 16S    | Insecta | Ephemeroptera | Heptageniidae            | Rhithrogeniinae | Rhithrogena      |                   | NA  | 0              | 0.0016        | 0              | 1             |
| 16S    | Insecta | Ephemeroptera | Heptageniidae            | Rhithrogeniinae | Rhithrogena      |                   | NA  | 0              | 0.0016        | 0              | 1             |

| Primer | Class   | Order       | Family           | Subfamily        | Genus         | Species      | BIN | M. ussuriensis | M. ikonnikovi | M. ussuriensis | M. ikonnikovi |
|--------|---------|-------------|------------------|------------------|---------------|--------------|-----|----------------|---------------|----------------|---------------|
| 16S    | Insecta | Hemiptera   | Miridae          | Mirinae          | Adelphocoris  |              | NA  | 0              | 0.0016        | 0              | 1             |
| 16S    | Insecta | Hemiptera   | Miridae          | Deraeocorinae    | Alloeotomus   | simplus      | NA  | 0              | 0.0016        | 0              | 1             |
| 16S    | Insecta | Hemiptera   | Miridae          | Mirinae          | Arbolygus     | rubripes     | NA  | 0.006          | 0.0000        | 2              | 0             |
| 16S    | Insecta | Hemiptera   | Acanthosomatidae | Acanthosomatinae | Elasmucha     | signoreti    | NA  | 0.003          | 0             | 1              | 0             |
| 16S    | Insecta | Hemiptera   | Miridae          | Mirinae          | Phytocoris    |              | NA  | 0              | 0.0016        | 0              | 1             |
| 16S    | Insecta | Hemiptera   | Psyllidae        | Psyllinae        | Psylla        |              | NA  | 0.003          | 0.0016        | 1              | 1             |
| 16S    | Insecta | Hemiptera   | Psyllidae        | Psyllinae        | Psylla        |              | NA  | 0.006          | 0.0016        | 2              | 1             |
| 16S    | Insecta | Hemiptera   | Aphididae        | Calaphidinae     | Symydobius    | kabae        | NA  | 0              | 0.0016        | 0              | 1             |
| 16S    | Insecta | Hymenoptera | Braconidae       | Rogadinae        | Aleiodes      |              | NA  | 0.003          | 0             | 1              | 0             |
| 16S    | Insecta | Hymenoptera | Ichneumonidae    | Campopleginae    | Hyposoter     |              | NA  | 0.003          | 0             | 1              | 0             |
| 16S    | Insecta | Hymenoptera | Braconidae       | Microgastrinae   | Microplitis   |              | NA  | 0.003          | 0             | 1              | 0             |
| 16S    | Insecta | Hymenoptera |                  |                  |               |              | NA  | 0.003          | 0             | 1              | 0             |
| 16S    | Insecta | Hymenoptera | Formicidae       |                  |               |              | NA  | 0              | 0.0016        | 0              | 1             |
| 16S    | Insecta | Hymenoptera | Tenthredinidae   | Nematinae        | Nematinus     | luteus       | NA  | 0.003          | 0             | 1              | 0             |
| 16S    | Insecta | Lepidoptera | Geometridae      | Ennominae        | Arichanna     | melanaria    | NA  | 0.003          | 0             | 1              | 0             |
| 16S    | Insecta | Lepidoptera | Noctuidae        |                  |               |              | NA  | 0.006          | 0             | 2              | 0             |
| 16S    | Insecta | Lepidoptera | Tortricidae      | Tortricinae      |               |              | NA  | 0              | 0.0033        | 0              | 2             |
| 16S    | Insecta | Trichoptera | Limnephilidae    | Dicosmoecinae    | Dicosmoecus   |              | NA  | 0              | 0.0065        | 0              | 4             |
| 16S    | Insecta | Lepidoptera | Geometridae      | Ennominae        | Ectropis      | obliqua      | NA  | 0.009          | 0             | 3              | 0             |
| 16S    | Insecta | Lepidoptera | Tortricidae      | Tortricinae      |               |              | NA  | 0.003          | 0.0033        | 1              | 2             |
| 16S    | Insecta | Lepidoptera | Geometridae      | Ennominae        | Jankowskia    |              | NA  | 0.006          | 0             | 2              | 0             |
| 16S    | Insecta | Lepidoptera | Geometridae      | Larentiinae      | Lobogonodes   | erectaria    | NA  | 0.003          | 0.0016        | 1              | 1             |
| 16S    | Insecta | Lepidoptera | Erebidae         | Lymantriinae     | Lymantria     |              | NA  | 0.006          | 0.0016        | 2              | 1             |
| 16S    | Insecta | Lepidoptera | Geometridae      | Ennominae        | Myrioblephara | cilicornaria | NA  | 0.003          | 0             | 1              | 0             |
| 16S    | Insecta | Lepidoptera |                  |                  |               |              | NA  | 0.003          | 0.0033        | 1              | 2             |
| 16S    | Insecta | Lepidoptera | Noctuidae        | Noctuinae        | Panolis       |              | NA  | 0.003          | 0             | 1              | 0             |
| 16S    | Insecta | Lepidoptera | Noctuidae        | Hadeninae        | Panolis       |              | NA  | 0.006          | 0             | 2              | 0             |
| 16S    | Insecta | Lepidoptera | Noctuidae        | Noctuinae        | Panolis       |              | NA  | 0.003          | 0.0016        | 1              | 1             |
| 16S    | Insecta | Lepidoptera | Noctuidae        |                  |               |              | NA  | 0.003          | 0             | 1              | 0             |
| 16S    | Insecta | Lepidoptera | Noctuidae        |                  |               |              | NA  | 0.003          | 0.0016        | 1              | 1             |
| 16S    | Insecta | Lepidoptera | Thyrididae       | Siculodinae      | Pyrinioides   | aurea        | NA  | 0              | 0.0016        | 0              | 1             |
| 16S    | Insecta | Lepidoptera | Saturniidae      | Saturniinae      | Saturnia      |              | NA  | 0.016          | 0             | 5              | 0             |
| 16S    | Insecta | Mecoptera   | Panorpidae       | Panorpinae       | Panorpa       | takenouchii  | NA  | 0              | 0.0016        | 0              | 1             |
| 16S    | Insecta | Neuroptera  | Chrysopidae      | Chrysopinae      | Apertochrysa  |              | NA  | 0              | 0.0016        | 0              | 1             |
| 16S    | Insecta | Neuroptera  | Chrysopidae      | Chrysopinae      | Chrysoperla   |              | NA  | 0              | 0.0016        | 0              | 1             |
| 16S    | Insecta | Neuroptera  | Chrysopidae      | Chrysopinae      | Chrysoperla   |              | NA  | 0              | 0.0016        | 0              | 1             |
| 16S    | Insecta | Neuroptera  | Osmyidae         | Osmyinae         | Osmylus       |              | NA  | 0              | 0.0033        | 0              | 2             |
| 16S    | Insecta | Neuroptera  | Hemerobiidae     | Hemerobiinae     |               |              | NA  | 0              | 0.0049        | 0              | 3             |

| Primer | Class   | Order        | Family           | Subfamily       | Genus            | Species        | BIN | M. ussuriensis | M. ikonnikovi | M. ussuriensis | M. ikonnikovi |
|--------|---------|--------------|------------------|-----------------|------------------|----------------|-----|----------------|---------------|----------------|---------------|
| 16S    | Insecta | Odonata      | Libellulidae     | Sympetrinae     | Sympetrum        | frequens       | NA  | 0.016          | 0.0016        | 5              | 1             |
| 16S    | Insecta | Odonata      | Libellulidae     | Sympetrinae     | Sympetrum        | infuscatum     | NA  | 0.006          | 0             | 2              | 0             |
| 16S    | Insecta | Orthoptera   | Rhaphidophoridae | Aemodogryllinae |                  |                | NA  | 0.003          | 0             | 1              | 0             |
| 16S    | Insecta | Orthoptera   | Trigonidiidae    | Nemobiinae      | Dianemobius      | nigrofasciatus | NA  | 0.003          | 0             | 1              | 0             |
| 16S    | Insecta | Orthoptera   | Rhaphidophoridae | Aemodogryllinae | Diestrammena     |                | NA  | 0.003          | 0             | 1              | 0             |
| 16S    | Insecta | Orthoptera   | Rhaphidophoridae |                 |                  |                | NA  | 0              | 0.0000        | 1              | 0             |
| 16S    | Insecta | Orthoptera   | Rhaphidophoridae |                 |                  |                | NA  | 0              | 0.0016        | 0              | 1             |
| 16S    | Insecta | Plecoptera   | Perlidae         | Acroneuriinae   | Calineuria       |                | NA  | 0              | 0.0033        | 0              | 2             |
| 16S    | Insecta | Plecoptera   | Nemouridae       |                 |                  |                | NA  | 0              | 0.0016        | 0              | 1             |
| 16S    | Insecta | Psocodea     | Amphipsocidae    | Amphipsocinae   | Amphipsocus      | japonicus      | NA  | 0              | 0.0016        | 0              | 1             |
| 16S    | Insecta | Psocodea     |                  |                 |                  |                | NA  | 0              | 0.0016        | 0              | 1             |
| 16S    | Insecta | Psocodea     | Mesopsocidae     | NA              | Mesopsocus       | unipunctatus   | NA  | 0              | 0.0016        | 0              | 1             |
| 16S    | Insecta | Psocodea     | Psocidae         | Psocinae        | Psococerastis    |                | NA  | 0.003          | 0.0049        | 1              | 3             |
| 16S    | Insecta | Psocodea     | Psocidae         | Psocinae        | Psococerastis    | nubila         | NA  | 0.016          | 0             | 5              | 0             |
| 16S    | Insecta | Psocodea     | Stenopsocidae    | NA              | Stenopsocus      | nigricellus    | NA  | 0              | 0.0033        | 0              | 2             |
| 16S    | Insecta | Psocodea     | Psocidae         | Psocinae        | Trichadenotecnum |                | NA  | 0              | 0.0016        | 0              | 1             |
| 16S    | Insecta | Psocodea     | Psocidae         | Psocinae        | Trichadenotecnum | incognitum     | NA  | 0              | 0.0016        | 0              | 1             |
| 16S    | Insecta | Psocodea     | Psocidae         | Psocinae        | Trichadenotecnum |                | NA  | 0              | 0.0033        | 0              | 2             |
| 16S    | Insecta | Thysanoptera | Thripidae        | Thripinae       | Thrips           |                | NA  | 0              | 0.0033        | 0              | 2             |
